# Supplementary material for: Targeting ATP2B1 impairs PI3K/Akt/FOXO signaling and reduces SARS-COV-2 infection and replication
Source: PubMed Central journal article supplement (PMC11239940; doi:10.1038/s44319-024-00164-z), 2024-05-30
Supplement: 44319_2024_164_MOESM1_ESM.pdf [file 44319_2024_164_MOESM1_ESM.pdf]

## Appendix table section

|                   |                                                                                                                                |            |
|-------------------|--------------------------------------------------------------------------------------------------------------------------------|------------|
| Appendix table S1 | Differentially expressed genes upon SARS-CoV-2 early infection in HEK-293T-ACE2 cells that take part in “Calcium Signaling”.   | Pag. 2-4   |
| Appendix table S2 | Rare coding pathogenic variants in the <i>ATP2B1</i> locus.                                                                    | Pag. 5     |
| Appendix table S3 | Noncoding variants in the genomic region of the <i>ATP2B1</i> locus that act as “expression quantitative traits loci” (eQTLs). | Pag. 6-13  |
| Appendix table S4 | eQTLs SNPs for the <i>ATP2B1</i> gene from the “Genotype-Tissue Expression” (GTEx) database ( $P < 1 \times 10^{-6}$ ).        | Pag. 14-15 |
| Appendix table S5 | Differentially expressed genes in HEK-293T edited cells                                                                        | Pag. 16-25 |
| Appendix table S6 | Differentially expressed proteins in HEK293T-ACE2 cells upon treatment with 1 $\mu$ M compound #7 for 24 h.                    | Pag. 26-27 |
| Appendix table S7 | Proteins that take part in the interaction network, according to those downregulated by compound #7 in HEK293T-ACE2 cells.     | Pag. 28    |
| Appendix table S8 | Proteins that take part in the interaction-network, according to those upregulated by compound #7 in HEK293T-ACE2 cells.       | Pag. 29-31 |
| Appendix table S9 | Primers sequences for qPCR analyses                                                                                            | Pag. 32    |

**Appendix table S1. Differentially expressed genes upon SARS-CoV-2 early infection in HEK-293T-ACE2 cells that take part in “Calcium Signaling”.**

The “Ca<sup>2+</sup> signaling by reactome pathway” through RNAseq analyses from the differentially expressed genes in HEK293T-ACE2 cells infected with SARS-CoV-2 (VOC Delta, 24 h) *versus* Mock infected cells. Here, 157 genes involved in Calcium Signaling were significantly deregulated by SARS-CoV-2 after 24 h. Data given include gene name, BaseMean (average of the normalized count values), log2FoldChange, lfcSE (standard error), pValue and adjusted p value (padj) are listed. Red, membrane and endoplasmic reticulum Ca<sup>2+</sup> pumps (i.e., ATP2Bs and ATP2As, respectively).

| Gene name | BaseMean            | Log2FoldChange       | lfcSE               | pValue                   | pAdj                 |
|-----------|---------------------|----------------------|---------------------|--------------------------|----------------------|
| EGF       | 470.066.492.265.217 | -40.619.336.960.114  | 0.664028018529976   | 7,08E+03                 | 1,05E+05             |
| CAMK1G    | 364.858.544.902.485 | -340.754.771.922.581 | 0.913198249232395   | 8,34E+08                 | 5,08E+09             |
| TNNC2     | 201.384.809.825.337 | -316.776.580.773.799 | 125.621.979.502.456 | 0.00042607547668988<br>6 | 0.00177089604329882  |
| KDR       | 447.921.773.022.525 | -291.789.785.352.181 | 0.690679824706131   | 1,20E+08                 | 8,54E+08             |
| PTGER3    | 2.631.393.772.017   | -259.177.710.593.284 | 0.807666047432124   | 6,24E+09                 | 0.000316375821514552 |
| CACNA1I   | 869.350.624.213.802 | -245.646.245.246.643 | 0.413068357989845   | 1,64E+04                 | 2,27E+05             |
| FGF19     | 595.183.107.293.085 | -24.348.301.365.875  | 0.498409657835589   | 6,06E+06                 | 5,46E+07             |
| ATP2B2    | 270.270.787.313.473 | -22.332.018.924.914  | 0.766386590862842   | 0.00016831085550505<br>8 | 0.000771084907017115 |
| MYLK4     | 359.196.817.041.812 | -218.249.512.123.712 | 0.653358723896032   | 4,44E+09                 | 0.000231472468385037 |
| CACNA1G   | 945.542.009.013.953 | -193.464.303.503.756 | 0.183028207937104   | 2,77E-13                 | 3,38E-12             |
| NTRK3     | 280.665.734.128.966 | -191.862.731.213.666 | 0.798849668970072   | 0.00074265514144629<br>1 | 0.00289573206235725  |
| AVPR1A    | 486.965.123.732.544 | -18.995.518.921.901  | 0.577352080972861   | 5,66E+09                 | 0.00028951664775388  |
| RYR2      | 163.422.835.354.659 | -189.620.200.301.431 | 0.315137422842955   | 1,23E+04                 | 1,74E+05             |
| PRKCG     | 549.075.446.715.279 | -177.755.730.324.405 | 0.188372347832613   | 3,09E-09                 | 2,15E-06             |
| RYR1      | 809.194.404.057.114 | -169.311.919.230.691 | 0.486468803564657   | 3,24E+08                 | 0.000174489336118528 |
| PDGFRB    | 324.832.730.647.174 | -166.275.196.192.471 | 0.771626078491638   | 0.00147511758120898      | 0.00532287697789966  |
| NGF       | 301.570.589.660.459 | -15.325.074.691.358  | 0.745790834556926   | 0.0020175651560619       | 0.00702354442142255  |
| FGF18     | 298.564.044.685.259 | -148.439.847.088.366 | 0.828292832261265   | 0.00337210418608626      | 0.0110347633464023   |
| CALML6    | 490.099.528.433.961 | -131.370.510.943.569 | 0.825860210839343   | 0.00533449786994513      | 0.0164946648727855   |
| GRIN1     | 157.108.717.534.577 | -128.763.563.304.787 | 0.323378819942514   | 6,46E+08                 | 4,02E+09             |
| NTRK2     | 262.623.726.884.291 | -128.054.971.330.727 | 0.243831076403219   | 1,58E+06                 | 1,58E+07             |
| NTRK1     | 578.235.945.050.576 | -12.596.871.921.419  | 0.551982314520049   | 0.00162927852165569      | 0.00581799505388285  |
| GDNF      | 558.396.367.605.257 | -125.541.837.244.765 | 0.531587287153423   | 0.00137309343890679      | 0.00500164697395093  |
| PHKG1     | 399.138.091.587.535 | -122.304.443.526.309 | 0.632694503323343   | 0.00358227204856374      | 0.0116168708830677   |
| PTGFR     | 276.774.110.594.092 | -116.245.612.041.348 | 0.826887731548613   | 0.00858417601832968      | 0.0248084910809525   |
| ADRB2     | 103.466.364.639.335 | -115.829.451.291.408 | 0.424783537150509   | 0.00059891519425065      | 0.0023882746914971   |
| ATP2A1    | 203.108.013.385.034 | -107.280.686.165.945 | 0.262329863906071   | 5,49E+08                 | 3,46E+09             |
| ERBB4     | 170.776.039.723.201 | -104.381.160.003.265 | 0.300596363974115   | 6,48E+09                 | 0.00032742177194106  |
| CACNA1C   | 393.319.540.235.024 | -102.106.063.979.435 | 0.192751646909679   | 1,72E+06                 | 1,71E+07             |
| ADRA1B    | 591.447.672.206.431 | -101.281.999.512.882 | 0.511038582291448   | 0.00457889299727663      | 0.0144293335681128   |
| SLC8A3    | 95.692.745.140.642  | -0.998473384007727   | 0.410221783240345   | 0.00169667248287767      | 0.00602970050421849  |
| PLCB4     | 853.137.293.137.909 | -0.980318301180731   | 0.140257942056366   | 4,46E+01                 | 9,22E+02             |
| HRH1      | 274.954.013.122.704 | -0.960466468918194   | 0.835252217871031   | 0.0151214999321587       | 0.0400493571921168   |
| P2RX2     | 210.012.518.949.649 | -0.906096933837229   | 0.255316025097521   | 6,31E+09                 | 0.000319747150885531 |
| CACNA1B   | 420.417.802.824.201 | -0.887883543343921   | 0.188611910026867   | 4,54E+07                 | 3,47E+07             |
| GRIN2C    | 134.980.629.604.766 | -0.861218744558696   | 0.31162870962008    | 0.00093207236502574<br>7 | 0.00354992600479506  |
| SLC8A2    | 273.654.190.588.128 | -0.858567119679333   | 0.237358375185696   | 5,37E+08                 | 0.000275901884465897 |
| MST1      | 588.954.201.846.589 | -0.829615004504173   | 0.243875246591338   | 0.00012560827259748<br>5 | 0.000592232918411347 |
| MCOLN3    | 165.355.435.122.002 | -0.827337601316473   | 0.128096033644867   | 2,26E+03                 | 3,64E+04             |
| PDGFB     | 116.038.571.818.564 | -0.802905099711672   | 0.413428970321733   | 0.00785763338500944      | 0.0230062180714721   |
| PLCD1     | 606.706.213.146.116 | -0.73419217381745    | 0.211338432292575   | 0.00012848035124916<br>1 | 0.000604624576401611 |
| PTAFR     | 148.429.292.120.027 | -0.718467868052912   | 0.305326705403937   | 0.00398084691805461      | 0.0127481951469379   |

|             |                     |                      |                        |                          |                      |
|-------------|---------------------|----------------------|------------------------|--------------------------|----------------------|
| SPHK1       | 425.399.369.213.307 | -0.707202397121825   | 0.201780650419755      | 0.00011606115231730<br>1 | 0.000552590774509452 |
| ADRB1       | 655.653.614.469.463 | -0.679205605810754   | 0.472803117372689      | 0.025791562973466        | 0.0629923986317459   |
| FLT1        | 700.355.766.267.359 | -0.669898202668207   | 0.185104262705454      | 8,28E+09                 | 0.000409305590749802 |
| AGTR1       | 114.530.552.323.422 | -0.656048536313823   | 0.390155781513432      | 0.0194109134979577       | 0.049664781084052    |
| TPCN1       | 252.604.797.979.172 | -0.600289817556319   | 0.132545750778705      | 2,04E+07                 | 1,39E+09             |
| PHKA2       | 175.224.737.675.515 | -0.561183955695007   | 0.120614441069424      | 1,27E+08                 | 8,99E+08             |
| FGF2        | 107.171.213.660.927 | -0.52864644155335    | 0.131546499596881      | 2,52E+09                 | 0.000138420306528569 |
| ERBB3       | 120.866.178.420.076 | -0.526562320203576   | 0.13331201305227       | 3,35E+09                 | 0.000179921804431245 |
| CACNA1<br>D | 336.171.601.170.013 | -0.513843498616443   | 0.231116856688361      | 0.0101629928909175       | 0.0285960922734542   |
| FGF9        | 481.838.217.511.183 | -0.440316618339933   | 0.201003686986393      | 0.0138044691557052       | 0.0370226603357302   |
| ITPR3       | 544.035.684.154.367 | -0.436844916967323   | 0.085893627458068<br>5 | 2,85E+07                 | 2,25E+07             |
| BDKRB2      | 432.395.097.685.611 | -0.433653663001909   | 0.497631594097063      | 0.0986511036863904       | 0.187638940694549    |
| SLC8A1      | 522.452.995.997.531 | -0.425640845179831   | 0.209128356637808      | 0.0207771460712456       | 0.0526173559586334   |
| PDE1B       | 289.070.207.499.701 | -0.410559888941243   | 0.206926593742145      | 0.0245441014890181       | 0.0604941914017028   |
| VEGFA       | 297.506.769.867.281 | -0.405780412554488   | 0.142594980006681      | 0.00247420124223248      | 0.00837757964418323  |
| FGF5        | 79.709.394.383.223  | -0.399984899482115   | 0.356896301574514      | 0.108219512397703        | 0.201880061965315    |
| ATP2B4      | 283.800.562.649.639 | -0.394169016228452   | 0.126855884293042      | 0.00112236419580121      | 0.00418746949373256  |
| RET         | 577.232.271.862.126 | -0.353170332880125   | 0.170689077431222      | 0.0239340673097788       | 0.0592338298112563   |
| PDGFA       | 579.364.106.716.877 | -0.322941855478592   | 0.173196187829469      | 0.0411391142990746       | 0.0926751594433211   |
| CCKBR       | 126.784.008.566.849 | -0.320952603632085   | 0.304055604871576      | 0.161838087141715        | 0.276984470866739    |
| LTBR2       | 189.584.854.807.253 | -0.313758791468503   | 0.26937952269752       | 0.146164169708267        | 0.255529602755143    |
| MCOLN2      | 113.978.857.145.436 | -0.301788122475556   | 0.137806208277608      | 0.0203855557780396       | 0.0517490197933601   |
| PRKCB       | 25.235.847.386.427  | -0.29501851474154    | 0.109946339948008      | 0.00539312477447984      | 0.0166518138449238   |
| CAMK2B      | 772.906.926.209.551 | -0.283029002203993   | 0.145730810888778      | 0.0383029245794291       | 0.0874986769446822   |
| PDGFR3      | 109.866.805.847.052 | -0.282309320967817   | 0.292729826783         | 0.211044616859362        | 0.340490350351324    |
| CHRM3       | 560.839.356.409.002 | -0.251888870437173   | 0.160119800958921      | 0.088376618755959        | 0.1719817480213      |
| FGF17       | 16.496.815.745.705  | -0.248096374729555   | 0.249482103006665      | 0.227384140460309        | 0.359420066595756    |
| ADCY7       | 599.531.283.129.749 | -0.242677303099414   | 0.155103300744442      | 0.0923579071335468       | 0.178067513485704    |
| HTR6        | 354.992.109.224.363 | -0.236382187781594   | 0.198583734709514      | 0.179234191122456        | 0.300143455269253    |
| NOS2        | 382.743.199.985.029 | -0.216942472653685   | 0.216414799478264      | 0.246028914267307        | 0.382173021389535    |
| CAMK1D      | 115.738.679.551.248 | -0.20243741585522    | 0.144915532772324      | 0.1364996988295          | 0.242143975557365    |
| PTK2B       | 3.347.654.773.982   | -0.198541912471893   | 0.198825455813247      | 0.259322322212717        | 0.397481473680127    |
| PLCG2       | 128.718.181.153.958 | -0.14600446908614    | 0.133411235660135      | 0.248733561997342        | 0.385274541913544    |
| CALML4      | 720.412.591.192.242 | -0.142650941830901   | 0.163982197735486      | 0.344385374689041        | 0.489805705022451    |
| OXR         | 148.277.035.788.061 | -0.141149910723466   | 0.274436307642278      | 0.508031589930453        | 0.648622564287605    |
| CHRNA7      | 489.354.903.796.243 | -0.137351331277486   | 0.16799105529875       | 0.373336159701828        | 0.519360460101477    |
| ITPR1       | 194.448.959.208.382 | -0.130765692109194   | 0.135837801130851      | 0.309257090522638        | 0.45335357342098     |
| PHKA1       | 179.591.123.826.724 | -0.125547564416148   | 0.103400902226699      | 0.210340488576319        | 0.339696463309899    |
| ADORA2<br>A | 223.762.626.919.609 | -0.106559430507992   | 0.419538375673638      | 0.476481309897874        | 0.620376663464722    |
| PLCG1       | 699.101.491.751.449 | -0.104642450208333   | 0.086500426193055<br>6 | 0.215520564598944        | 0.345427330349358    |
| FGFR4       | 208.232.993.177.581 | -0.101715568146048   | 0.102865746174184      | 0.308028355572787        | 0.452073453570876    |
| FGFR1       | 499.106.216.692.943 | -0.0923093100011115  | 0.094948198058186<br>3 | 0.304396825481386        | 0.448217896866103    |
| PHKG2       | 314.206.921.479.836 | -0.0911508288462413  | 0.124077121364634      | 0.44208383855371         | 0.587814337568264    |
| ADCY9       | 235.254.942.195.309 | -0.0837295765189726  | 0.097410651394322<br>1 | 0.376355915316127        | 0.522388753677872    |
| FGF8        | 464.562.300.432.542 | -0.0761848939011496  | 0.353716413037013      | 0.713462371093803        | 0.813931531496335    |
| ATP2B3      | 587.586.125.763.348 | -0.0626210328757565  | 0.439048123471953      | 0.0738189363850452       | 0.14885884758557     |
| CXCR4       | 122.446.292.826.757 | -0.0603388356624955  | 0.143329518789903      | 0.655120311029227        | 0.76759630744944     |
| PLCB1       | 994.674.848.651.785 | -0.0589275381309039  | 0.14056687275296       | 0.656669719144886        | 0.768689888118064    |
| MST1R       | 165.032.670.287.062 | -0.0494471966447024  | 0.245291459692777      | 0.802995262899111        | 0.878339556478466    |
| CAMK4       | 891.013.810.454.115 | -0.0452814478563072  | 0.177434779926719      | 0.778334345320621        | 0.861379840200812    |
| STIM2       | 95.701.248.136.539  | -0.0390808211180951  | 0.140900346772734      | 0.76820715039287         | 0.854282496755984    |
| PLCE1       | 107.195.402.497.356 | -0.0341801457720718  | 0.145079723037892      | 0.801377847150615        | 0.87713678071911     |
| ITPKC       | 70.396.087.492.243  | -0.0284050996316445  | 0.143515642077651      | 0.835382348472484        | 0.901049822420575    |
| ADCY1       | 190.640.441.243.435 | -0.0234347315901111  | 0.129135611085778      | 0.848319232392113        | 0.909983793161546    |
| PPP3CC      | 594.164.875.490.275 | -0.0217191364607527  | 0.151752406462586      | 0.877965754946522        | 0.929456415592496    |
| ATP2A3      | 57.861.264.377.674  | -0.0129319930116038  | 0.154240920271403      | 0.926149963731589        | 0.958988807760499    |
| CACNA1<br>H | 345.963.329.850.669 | -0.0119216426741543  | 0.105863576682641      | 0.924981441177746        | 0.958205598411089    |
| GRIN2D      | 787.806.074.900.388 | -0.00313600612645953 | 0.165848797099175      | 0.982047635092185        | 0.988873258407805    |
| ORAI3       | 669.964.822.841.849 | -0.0029585841913774  | 0.154784193674808      | 0.980434132269063        | 0.987886621158221    |
| PRKACA      | 511.052.546.711.711 | 8,08E+09             | 0.094452502184215<br>6 | 0.992207464272           | 0.995423498362367    |
| MYLK        | 499.839.296.301.556 | 0.00232286697512634  | 0.18351714058263       | 0.990738415795618        | 0.99448260200729     |
| FLT4        | 409.216.446.721.523 | 0.0279541004301016   | 0.095364013425897<br>6 | 0.785110815522244        | 0.865849292306412    |
| ITPR2       | 185.378.863.744.044 | 0.02851082365659     | 0.141313453931377      | 0.830830585455922        | 0.898094050005188    |

|             |                     |                    |                        |                          |                      |
|-------------|---------------------|--------------------|------------------------|--------------------------|----------------------|
| MYLK3       | 403.912.378.245.326 | 0.037299870072606  | 0.345347448460966      | 0.861313219529031        | 0.918180856193811    |
| PRKCA       | 370.983.476.105.691 | 0.0516584120737146 | 0.124335893152742      | 0.665347986001177        | 0.776105971436831    |
| ASPH        | 570.280.921.671.974 | 0.0628042195081283 | 0.083649571947982<br>1 | 0.418065723667828        | 0.564821627755414    |
| MCOLN1      | 854.203.446.687.649 | 0.0870758272799398 | 0.128577790062911      | 0.478726811743744        | 0.622464822939255    |
| STIM1       | 279.598.609.555.574 | 0.0889388752105342 | 0.088091687910722<br>6 | 0.302797288672749        | 0.446274957562273    |
| F2R         | 166.748.356.309.198 | 0.110639447436645  | 0.110393117808017      | 0.300908480333341        | 0.444224780302863    |
| EDNRA       | 206.182.690.976.498 | 0.11977237588773   | 0.239855306412242      | 0.583076385014544        | 0.710293050835899    |
| ATP2B1      | 461.626.628.987.639 | 0.138005263348501  | 0.104312447327456      | 0.173826346731307        | 0.29304324553352     |
| PLCB2       | 489.493.216.881.739 | 0.148460461120645  | 0.357200444519728      | 0.498085877010279        | 0.64013790333965     |
| EGFR        | 183.157.545.910.826 | 0.15414471676835   | 0.147426537239317      | 0.262530900964082        | 0.401076892043935    |
| CAMK2G      | 308.856.140.894.947 | 0.161321439499772  | 0.086196176705373<br>8 | 0.0560495627231519       | 0.119042800166328    |
| TPCN2       | 962.925.542.934.949 | 0.163688229634313  | 0.127735585791043      | 0.180017322232568        | 0.301137783686921    |
| MCU         | 232.326.143.842.897 | 0.221045523640019  | 0.094849679364502<br>1 | 0.0166832275403525       | 0.0435548197581096   |
| TBXA2R      | 2.791.255.953.813   | 0.221920495895446  | 0.210650643728027      | 0.22896567920061         | 0.361286110716458    |
| GNAQ        | 335.459.683.975.552 | 0.224240766827919  | 0.119403166128341      | 0.0505041469254608       | 0.109429738958333    |
| VEGFC       | 262.865.606.384.951 | 0.252700671951347  | 0.227767993537088      | 0.195701724209886        | 0.321311440786427    |
| MET         | 320.453.265.120.091 | 0.266669221254998  | 0.140882757374689      | 0.0439163404621055       | 0.0976594709508658   |
| GNAL        | 167.298.061.304.345 | 0.276532654299546  | 0.114951656898321      | 0.012100979045169        | 0.0331554640153218   |
| PDGFC       | 851.803.632.271.765 | 0.277270899831492  | 0.134986267423683      | 0.0305866358113616       | 0.0727059910065298   |
| PLCD3       | 169.699.382.882.478 | 0.281311858492587  | 0.120781708407388      | 0.0150483628998168       | 0.0398840609001914   |
| ITPKA       | 31.922.290.961.536  | 0.299758123828119  | 0.236373895471205      | 0.133703915861153        | 0.238283254794966    |
| ORAI2       | 198.370.882.017.582 | 0.307664239516031  | 0.120832479310531      | 0.00778793820930639      | 0.0228296793309466   |
| ATP2A2      | 153.064.511.889.483 | 0.315242341768931  | 0.091062086540377<br>9 | 0.00035780327113038<br>2 | 0.00151709402930254  |
| P2RX4       | 670.723.664.696.776 | 0.319126310522452  | 0.166028279387448      | 0.03684946883754         | 0.0846902290966677   |
| CAMK2D      | 277.091.778.625.274 | 0.349630625956543  | 0.110798494640924      | 0.00106991166438658      | 0.00401189901582001  |
| PLCB3       | 30.578.336.330.819  | 0.369227730401235  | 0.088576125299330<br>3 | 1,91E+09                 | 0.000108029201407511 |
| PPP3CA      | 256.585.595.024.188 | 0.373235392209162  | 0.12771848546183       | 0.00217807704361912      | 0.00749461396054691  |
| PRKACB      | 155.479.632.445.332 | 0.382557095457931  | 0.152796328493714      | 0.0077530204829596       | 0.0227452518074045   |
| ADCY3       | 35.157.160.555.465  | 0.384570165506337  | 0.10318861828844       | 0.00011816572969351      | 0.000561384634799467 |
| SLC25A4     | 222.886.070.310.512 | 0.426581089118532  | 0.129454666583038      | 0.00053890564175270<br>2 | 0.00217817459658416  |
| ORAI1       | 109.532.355.302.949 | 0.430951303438528  | 0.149874442423144      | 0.00215782305621755      | 0.00743753904020853  |
| ERBB2       | 466.302.801.935.591 | 0.453000747759762  | 0.085907033558212<br>5 | 7,17E+06                 | 6,35E+07             |
| PHKB        | 335.349.384.106.186 | 0.459366904885841  | 0.110460336516651      | 1,67E+07                 | 9,52E+09             |
| CALM1       | 120.000.433.254.103 | 0.473988326599753  | 0.082258598332982<br>7 | 4,03E+05                 | 4,40E+06             |
| FGFR3       | 412.173.682.384.824 | 0.478844958517372  | 0.092641626648047<br>2 | 1,18E+07                 | 1,01E+08             |
| GNAS        | 432.993.639.253.567 | 0.505876338060198  | 0.093387247483199<br>3 | 2,81E+06                 | 2,69E+07             |
| ADORA2<br>B | 662.365.757.868.432 | 0.555313439236578  | 0.153468486520173      | 0.00011564534209765<br>5 | 0.000550846120311868 |
| PPP3R1      | 311.618.175.694.851 | 0.55631882811167   | 0.11382605476247       | 4,12E+07                 | 3,18E+08             |
| GNAI1       | 419.075.116.639.903 | 0.557660312687605  | 0.114087597573777      | 4,22E+07                 | 3,24E+08             |
| SLC25A5     | 31.554.050.213.949  | 0.591996841533849  | 0.094422541231692<br>3 | 1,38E+03                 | 1,94E+05             |
| VDAC2       | 128.821.388.697.325 | 0.59427964544448   | 0.105051143244051      | 5,78E+04                 | 6,16E+06             |
| FGFR2       | 282.071.577.743.889 | 0.614594852851092  | 0.10179451505322       | 5,45E+04                 | 6,90E+05             |
| SPHK2       | 990.013.366.279.113 | 0.617877886815798  | 0.16358013542891       | 5,28E+08                 | 0.00027165538890307  |
| CALM2       | 139.947.481.397.403 | 0.658786203542567  | 0.087884305725829<br>9 | 1,66E+00                 | 4,31E+01             |
| VDAC3       | 615.721.313.965.366 | 0.659604486969271  | 0.079207967350540<br>8 | 2,75E-03                 | 1,01E-01             |
| VEGFB       | 182.794.381.075.822 | 0.66583541826766   | 0.128523584142247      | 6,82E+06                 | 6,07E+07             |
| SLC25A6     | 110.045.490.085.772 | 0.697750300545649  | 0.132019257663235      | 2,62E+06                 | 2,52E+07             |
| PPP3CB      | 282.723.784.431.472 | 0.737736854234094  | 0.1037294597725        | 3,04E+01                 | 6,49E+02             |
| CALM3       | 237.389.641.209.479 | 0.740184385222163  | 0.070241951160023      | 3,98E-12                 | 4,23E-10             |
| VDAC1       | 127.948.228.767.543 | 0.798029346731346  | 0.088243570587933<br>9 | 2,97E-06                 | 1,58E-04             |
| CAMK1       | 302.929.731.805.388 | 0.832051455658237  | 0.114559291649818      | 8,35E+00                 | 1,95E+02             |

**Appendix table S2. Rare coding pathogenic variants in the *ATP2B1* locus.**

Among the 351 coding variants of *ATP2B1* from “The Genome Aggregation Database” (GnomAD v2.1), 13 are reported as “pathogenic” according to “Functional Analysis through Hidden Markov Models” (FATHMM) prediction scores. These variants are rare and were thus excluded from further investigations. Data given include chromosomal locus, position, rsID, dbSNP ID, protein consequence, fathmm prediction, reference and alternative alleles, transcript consequence, variant annotation, and allele frequency.

| Chr | Position | rsID        | dbSNP       | ID             | Protein | FATHMM prediction | Ref | Alt | Transcript consequence | Annotation       | Allele frequency |
|-----|----------|-------------|-------------|----------------|---------|-------------------|-----|-----|------------------------|------------------|------------------|
| 12  | 89984832 | rs115449702 | rs115449702 | NP_001673.2    | I1198V  | DAMAGING          | T   | C   | c.3592A>G              | missense_variant | 7,96096E-06      |
| 12  | 89984882 | rs142404163 | rs142404163 | NP_001673.2    | P1181H  | DAMAGING          | G   | T   | c.3542C>A              | missense_variant | 0,000453695      |
| 12  | 89995138 | rs79015625  | rs79015625  | NP_001001323.1 | I1045V  | DAMAGING          | T   | C   | c.3133A>G              | missense_variant | 0,000900653      |
| 12  | 89997018 | rs189003061 | rs189003061 | NP_001673.2    | F954L   | DAMAGING          | A   | T   | c.2862T>A              | missense_variant | 4,24257E-06      |
| 12  | 90005121 | rs182212584 | rs182212584 | NP_001001323.1 | R699T   | DAMAGING          | C   | G   | c.2096G>C              | missense_variant | 3,00153E-05      |
| 12  | 90010584 | rs145288143 | rs145288143 | NP_001001323.1 | P688T   | DAMAGING          | G   | T   | c.2062C>A              | missense_variant | 1,99351E-05      |
| 12  | 90013932 | rs199582675 | rs199582675 | NP_001673.2    | R558Q   | DAMAGING          | C   | T   | c.1673G>A              | missense_variant | 3,98137E-06      |
| 12  | 90018046 | rs184588664 | rs184588664 | NP_001673.2    | F420L   | DAMAGING          | A   | G   | c.1258T>C              | missense_variant | 3,98096E-06      |
| 12  | 90018088 | rs116585190 | rs116585190 | NP_001001323.1 | A406S   | DAMAGING          | C   | A   | c.1216G>T              | missense_variant | 0,000159293      |
| 12  | 90028654 | rs149203241 | rs149203241 | NP_001001323.1 | L230F   | DAMAGING          | G   | C   | c.688C>G               | missense_variant | 4,00208E-06      |
| 12  | 90036125 | rs200832650 | rs200832650 | NP_001001323.1 | S72R    | DAMAGING          | A   | T   | c.216T>A               | missense_variant | 8,22788E-06      |
| 12  | 90049575 | rs116694524 | rs116694524 | NP_001001323.1 | T30M    | DAMAGING          | G   | A   | c.89C>T                | missense_variant | 0,000767591      |
| 12  | 90049584 | rs201371800 | rs201371800 | NP_001001323.1 | F27Y    | DAMAGING          | A   | T   | c.80T>A                | missense_variant | 3,97712E-06      |

**Appendix table S3. Noncoding variants in the genomic region of the *ATP2B1* locus that act as “expression quantitative traits loci” (eQTLs).**

In-silico analysis pipeline identifying the presence of noncoding variants in the *ATP2B1* locus acting as expression quantitative traits. Data given include genecode ID, gene symbol, variant ID (chromosomal position, alternative and reference alleles), SNP ID, P-value, normalized enrichment score (NES) and tissue (using the “Genotype-Tissue Expression” GTex database).

| Genecode Id        | Gene symbol | Variant Id                 | SNP Id      | P-value  | NES   | Tissue                                   |
|--------------------|-------------|----------------------------|-------------|----------|-------|------------------------------------------|
| ENSG00000070961.15 | ATP2B1      | chr12 89615182 A G b38     | rs2681472   | 1,60E-18 | 0,35  | Artery - Tibial                          |
| ENSG00000070961.15 | ATP2B1      | chr12 89619312 T C b38     | rs2681492   | 3,40E-18 | 0,35  | Artery - Tibial                          |
| ENSG00000070961.15 | ATP2B1      | chr12 89632685 G A b38     | rs11105352  | 3,60E-18 | 0,35  | Artery - Tibial                          |
| ENSG00000070961.15 | ATP2B1      | chr12 89632686 C A b38     | rs11105353  | 3,60E-18 | 0,35  | Artery - Tibial                          |
| ENSG00000070961.15 | ATP2B1      | chr12 89632746 A G b38     | rs11105354  | 3,60E-18 | 0,35  | Artery - Tibial                          |
| ENSG00000070961.15 | ATP2B1      | chr12 89656726 A G b38     | rs12579302  | 3,60E-18 | 0,35  | Artery - Tibial                          |
| ENSG00000070961.15 | ATP2B1      | chr12 89665065 G A b38     | rs111478946 | 3,60E-18 | 0,35  | Artery - Tibial                          |
| ENSG00000070961.15 | ATP2B1      | chr12 89675499 T G b38     | rs11105364  | 3,60E-18 | 0,35  | Artery - Tibial                          |
| ENSG00000070961.15 | ATP2B1      | chr12 89680664 G C b38     | rs11105368  | 7,40E-18 | 0,34  | Artery - Tibial                          |
| ENSG00000070961.15 | ATP2B1      | chr12 89681466 C T b38     | rs4842675   | 7,40E-18 | 0,34  | Artery - Tibial                          |
| ENSG00000070961.15 | ATP2B1      | chr12 89591515 AAAGT A b38 | rs10580742  | 1,20E-17 | 0,35  | Artery - Tibial                          |
| ENSG00000070961.15 | ATP2B1      | chr12 89696964 C T b38     | rs11105378  | 1,30E-17 | 0,34  | Artery - Tibial                          |
| ENSG00000070961.15 | ATP2B1      | chr12 89666809 G A b38     | rs17249754  | 1,50E-17 | 0,34  | Artery - Tibial                          |
| ENSG00000070961.15 | ATP2B1      | chr12 89668599 G A b38     | rs6538195   | 1,50E-17 | 0,34  | Artery - Tibial                          |
| ENSG00000070961.15 | ATP2B1      | chr12 89678299 G A b38     | rs73437358  | 1,50E-17 | 0,34  | Artery - Tibial                          |
| ENSG00000070961.15 | ATP2B1      | chr12 89625401 C G b38     | rs57481061  | 1,50E-17 | 0,34  | Artery - Tibial                          |
| ENSG00000070961.15 | ATP2B1      | chr12 89548613 A G b38     | rs11105328  | 1,70E-17 | 0,34  | Artery - Tibial                          |
| ENSG00000070961.15 | ATP2B1      | chr12 89547772 T C b38     | rs4842666   | 2,10E-17 | 0,34  | Artery - Tibial                          |
| ENSG00000070961.15 | ATP2B1      | chr12 89694803 T A b38     | rs11105375  | 5,70E-17 | 0,34  | Artery - Tibial                          |
| ENSG00000070961.15 | ATP2B1      | chr12 89697090 A G b38     | rs12230074  | 8,10E-17 | 0,33  | Artery - Tibial                          |
| ENSG00000070961.15 | ATP2B1      | chr12 89660842 T C b38     | rs73437338  | 1,50E-16 | 0,33  | Artery - Tibial                          |
| ENSG00000070961.15 | ATP2B1      | chr12 89597536 C T b38     | rs117742247 | 4,20E-16 | 0,34  | Artery - Tibial                          |
| ENSG00000070961.15 | ATP2B1      | chr12 89599730 A T b38     | rs11105337  | 4,60E-16 | 0,33  | Artery - Tibial                          |
| ENSG00000070961.15 | ATP2B1      | chr12 89694991 G A b38     | rs11105376  | 7,80E-16 | 0,33  | Artery - Tibial                          |
| ENSG00000070961.15 | ATP2B1      | chr12 89709925 C G b38     | rs2280715   | 4,30E-14 | 0,31  | Artery - Tibial                          |
| ENSG00000070961.15 | ATP2B1      | chr12 89713495 T C b38     | rs11105382  | 4,30E-14 | 0,31  | Artery - Tibial                          |
| ENSG00000070961.15 | ATP2B1      | chr12 89713529 T C b38     | rs11105383  | 4,30E-14 | 0,31  | Artery - Tibial                          |
| ENSG00000070961.15 | ATP2B1      | chr12 89719293 T G b38     | rs7299436   | 4,30E-14 | 0,31  | Artery - Tibial                          |
| ENSG00000070961.15 | ATP2B1      | chr12 89709168 C G b38     | rs73437382  | 8,00E-14 | 0,3   | Artery - Tibial                          |
| ENSG00000070961.15 | ATP2B1      | chr12 89698005 G C b38     | rs4842676   | 6,10E-13 | -0,27 | Artery - Tibial                          |
| ENSG00000070961.15 | ATP2B1      | chr12 89701396 T C b38     | rs11105379  | 1,40E-12 | 0,3   | Artery - Tibial                          |
| ENSG00000070961.15 | ATP2B1      | chr12 89695013 G A b38     | rs10858917  | 2,50E-12 | -0,26 | Artery - Tibial                          |
| ENSG00000070961.15 | ATP2B1      | chr12 89556543 A C b38     | rs7302816   | 4,50E-12 | 0,25  | Artery - Tibial                          |
| ENSG00000070961.15 | ATP2B1      | chr12 89713058 A G b38     | rs11105381  | 2,90E-11 | -0,25 | Artery - Tibial                          |
| ENSG00000070961.15 | ATP2B1      | chr12 89715560 T C b38     | rs2408046   | 5,50E-11 | -0,24 | Artery - Tibial                          |
| ENSG00000070961.15 | ATP2B1      | chr12 89703890 G C b38     | rs10745511  | 5,70E-11 | -0,25 | Artery - Tibial                          |
| ENSG00000070961.15 | ATP2B1      | chr12 89705620 T A b38     | rs2113894   | 5,70E-11 | -0,25 | Artery - Tibial                          |
| ENSG00000070961.15 | ATP2B1      | chr12 89696509 CAA C b38   | rs10550903  | 7,60E-11 | -0,23 | Artery - Tibial                          |
| ENSG00000070961.15 | ATP2B1      | chr12 89738370 G A b38     | rs12579052  | 5,40E-10 | 0,28  | Artery - Tibial                          |
| ENSG00000070961.15 | ATP2B1      | chr12 90001084 A T b38     | rs4408360   | 3,40E-08 | -0,18 | Esophagus - Mucosa                       |
| ENSG00000070961.15 | ATP2B1      | chr12_90024395_T_G_b38     | rs149193253 | 4,40E-08 | 1     | Brain - Anterior cingulate cortex (BA24) |
| ENSG00000070961.15 | ATP2B1      | chr12_90049701_T_C_b38     | rs150184539 | 4,40E-08 | 1     | Brain - Anterior cingulate cortex (BA24) |
| ENSG00000070961.15 | ATP2B1      | chr12_90137707_G_A_b38     | rs77187603  | 4,40E-08 | 1     | Brain - Anterior cingulate cortex (BA24) |
| ENSG00000070961.15 | ATP2B1      | chr12_90143905_A_G_b38     | rs150119566 | 4,40E-08 | 1     | Brain - Anterior cingulate cortex (BA24) |
| ENSG00000070961.15 | ATP2B1      | chr12 89677042 CAAAG C b38 | rs143087380 | 5,00E-08 | -0,17 | Artery - Tibial                          |
| ENSG00000070961.15 | ATP2B1      | chr12 90006794 TA T b38    | rs67882152  | 8,80E-08 | -0,18 | Esophagus - Mucosa                       |
| ENSG00000070961.15 | ATP2B1      | chr12 90006796 A T b38     | rs114744356 | 8,80E-08 | -0,18 | Esophagus - Mucosa                       |
| ENSG00000070961.15 | ATP2B1      | chr12 90010274 T C b38     | rs7488223   | 1,10E-07 | -0,17 | Esophagus - Mucosa                       |
| ENSG00000070961.15 | ATP2B1      | chr12 89973923 G C b38     | rs4842701   | 1,30E-07 | -0,17 | Esophagus - Mucosa                       |
| ENSG00000070961.15 | ATP2B1      | chr12 89997003 T C b38     | rs7968803   | 1,30E-07 | -0,18 | Esophagus - Mucosa                       |

|                    |        |                            |             |           |       |                                    |
|--------------------|--------|----------------------------|-------------|-----------|-------|------------------------------------|
| ENSG00000070961.15 | ATP2B1 | chr12 89991517 A G b38     | rs10777217  | 1,60E-07  | -0,17 | Esophagus - Mucosa                 |
| ENSG00000070961.15 | ATP2B1 | chr12 89595822 G A b38     | rs1401982   | 2,30E-07  | -0,16 | Artery - Tibial                    |
| ENSG00000070961.15 | ATP2B1 | chr12 89576142 A AACTC b38 | rs10689649  | 2,50E-07  | 0,16  | Artery - Tibial                    |
| ENSG00000070961.15 | ATP2B1 | chr12 89968275 A G b38     | rs4466894   | 2,70E-07  | -0,17 | Esophagus - Mucosa                 |
| ENSG00000070961.15 | ATP2B1 | chr12 89584456 C T b38     | rs1689040   | 2,80E-07  | 0,16  | Artery - Tibial                    |
| ENSG00000070961.15 | ATP2B1 | chr12 89951830 C T b38     | rs4842699   | 3,00E-07  | -0,17 | Esophagus - Mucosa                 |
| ENSG00000070961.15 | ATP2B1 | chr12 89631845 G A b38     | rs2681485   | 3,30E-07  | -0,16 | Artery - Tibial                    |
| ENSG00000070961.15 | ATP2B1 | chr12 90140138 C T b38     | rs55849728  | 3,80E-07  | -0,18 | Esophagus - Mucosa                 |
| ENSG00000070961.15 | ATP2B1 | chr12 89571272 C T b38     | rs7313874   | 3,90E-07  | 0,16  | Artery - Tibial                    |
| ENSG00000070961.15 | ATP2B1 | chr12 89434814 A G b38     | rs8181784   | 4,20E-07  | 0,17  | Artery - Tibial                    |
| ENSG00000070961.15 | ATP2B1 | chr12 89435693 C T b38     | rs11105287  | 4,20E-07  | 0,17  | Artery - Tibial                    |
| ENSG00000070961.15 | ATP2B1 | chr12 89569762 G GAGA b38  | rs35533953  | 4,20E-07  | 0,16  | Artery - Tibial                    |
| ENSG00000070961.15 | ATP2B1 | chr12 89687411 T C b38     | rs7136259   | 5,00E-07  | -0,16 | Artery - Tibial                    |
| ENSG00000070961.15 | ATP2B1 | chr12 89702568 T C b38     | rs10858918  | 5,00E-07  | -0,17 | Artery - Tibial                    |
| ENSG00000070961.15 | ATP2B1 | chr12 89943269 A C b38     | rs4842697   | 5,20E-07  | -0,17 | Esophagus - Mucosa                 |
| ENSG00000070961.15 | ATP2B1 | chr12 89436943 T C b38     | rs10777163  | 6,60E-07  | 0,17  | Artery - Tibial                    |
| ENSG00000070961.15 | ATP2B1 | chr12 89643729 T C b38     | rs111337717 | 7,20E-07  | 0,35  | Artery - Tibial                    |
| ENSG00000070961.15 | ATP2B1 | chr12 89713948 C T b38     | rs1590008   | 7,20E-07  | -0,16 | Artery - Tibial                    |
| ENSG00000070961.15 | ATP2B1 | chr12 89717005 G A b38     | rs1980235   | 7,20E-07  | -0,16 | Artery - Tibial                    |
| ENSG00000070961.15 | ATP2B1 | chr12 90156621 AG A b38    | rs369917221 | 7,60E-07  | 0,75  | Artery - Tibial                    |
| ENSG00000070961.15 | ATP2B1 | chr12 90025415 G A b38     | rs10858944  | 8,30E-07  | -0,16 | Esophagus - Mucosa                 |
| ENSG00000070961.15 | ATP2B1 | chr12 90034251 A G b38     | rs73208536  | 8,40E-07  | -0,16 | Esophagus - Mucosa                 |
| ENSG00000070961.15 | ATP2B1 | chr12_90385245_G_A_b38     | rs1594565   | 8,60E-07  | 0,38  | Brain - Spinal cord (cervical c-1) |
| ENSG00000070961.15 | ATP2B1 | chr12 90047438 T C b38     | rs10777221  | 8,70E-07  | -0,16 | Esophagus - Mucosa                 |
| ENSG00000070961.15 | ATP2B1 | chr12 90048224 G A b38     | rs7488974   | 8,70E-07  | -0,16 | Esophagus - Mucosa                 |
| ENSG00000070961.15 | ATP2B1 | chr12 89987295 A ATGTT b38 | rs10625779  | 9,80E-07  | -0,16 | Esophagus - Mucosa                 |
| ENSG00000070961.15 | ATP2B1 | chr12 89708115 T A b38     | rs1358350   | 9,90E-07  | -0,16 | Artery - Tibial                    |
| ENSG00000070961.15 | ATP2B1 | chr12 89640625 G GC b38    | rs66786558  | 0,0000011 | -0,16 | Artery - Tibial                    |
| ENSG00000070961.15 | ATP2B1 | chr12 89640630 T C b38     | rs78409878  | 0,0000011 | -0,16 | Artery - Tibial                    |
| ENSG00000070961.15 | ATP2B1 | chr12 89648365 C G b38     | rs11105358  | 0,0000011 | -0,16 | Artery - Tibial                    |
| ENSG00000070961.15 | ATP2B1 | chr12_90398938_C_T_b38     | rs7955801   | 0,0000012 | 0,38  | Brain - Spinal cord (cervical c-1) |
| ENSG00000070961.15 | ATP2B1 | chr12_90392860_A_C_b38     | rs2116497   | 0,0000012 | 0,37  | Brain - Spinal cord (cervical c-1) |
| ENSG00000070961.15 | ATP2B1 | chr12 89437093 C T b38     | rs10858851  | 0,0000012 | 0,17  | Artery - Tibial                    |
| ENSG00000070961.15 | ATP2B1 | chr12 90072266 A G b38     | rs6538223   | 0,0000012 | -0,16 | Esophagus - Mucosa                 |
| ENSG00000070961.15 | ATP2B1 | chr12 90168240 C T b38     | rs4842509   | 0,0000012 | -0,17 | Esophagus - Mucosa                 |
| ENSG00000070961.15 | ATP2B1 | chr12 90170518 A G b38     | rs17836934  | 0,0000014 | -0,17 | Esophagus - Mucosa                 |
| ENSG00000070961.15 | ATP2B1 | chr12 89482366 T C b38     | rs11105298  | 0,0000015 | 0,17  | Artery - Tibial                    |
| ENSG00000070961.15 | ATP2B1 | chr12_90391772_A_C_b38     | rs7976895   | 0,0000016 | 0,37  | Brain - Spinal cord (cervical c-1) |
| ENSG00000070961.15 | ATP2B1 | chr12_90393455_G_A_b38     | rs12580873  | 0,0000016 | 0,37  | Brain - Spinal cord (cervical c-1) |
| ENSG00000070961.15 | ATP2B1 | chr12 90084874 G A b38     | rs10858948  | 0,0000016 | -0,15 | Esophagus - Mucosa                 |
| ENSG00000070961.15 | ATP2B1 | chr12 90079719 A G b38     | rs6538224   | 0,0000017 | -0,16 | Esophagus - Mucosa                 |
| ENSG00000070961.15 | ATP2B1 | chr12_90376827_T_C_b38     | rs11105589  | 0,0000018 | 0,37  | Brain - Spinal cord (cervical c-1) |
| ENSG00000070961.15 | ATP2B1 | chr12_90386667_C_T_b38     | rs6538234   | 0,0000018 | 0,37  | Brain - Spinal cord (cervical c-1) |
| ENSG00000070961.15 | ATP2B1 | chr12_90388244_T_A_b38     | rs7979392   | 0,0000018 | 0,37  | Brain - Spinal cord (cervical c-1) |
| ENSG00000070961.15 | ATP2B1 | chr12_90390285_G_C_b38     | rs2043213   | 0,0000018 | 0,37  | Brain - Spinal cord (cervical c-1) |
| ENSG00000070961.15 | ATP2B1 | chr12 89526956 C T b38     | rs11105312  | 0,0000018 | 0,16  | Artery - Tibial                    |
| ENSG00000070961.15 | ATP2B1 | chr12 89527498 C T b38     | rs10777185  | 0,0000018 | 0,16  | Artery - Tibial                    |
| ENSG00000070961.15 | ATP2B1 | chr12 89625452 C T b38     | rs7297206   | 0,0000018 | -0,15 | Artery - Tibial                    |
| ENSG00000070961.15 | ATP2B1 | chr12 90059201 T C b38     | rs7959983   | 0,0000021 | -0,16 | Esophagus - Mucosa                 |
| ENSG00000070961.15 | ATP2B1 | chr12 90080698 G A b38     | rs7485419   | 0,0000021 | -0,16 | Esophagus - Mucosa                 |
| ENSG00000070961.15 | ATP2B1 | chr12_90376071_T_C_b38     | rs12582977  | 0,0000023 | 0,37  | Brain - Spinal cord (cervical c-1) |
| ENSG00000070961.15 | ATP2B1 | chr12 89533400 G A b38     | rs11105319  | 0,0000024 | 0,16  | Artery - Tibial                    |
| ENSG00000070961.15 | ATP2B1 | chr12 89534012 A G b38     | rs10858902  | 0,0000024 | 0,16  | Artery - Tibial                    |
| ENSG00000070961.15 | ATP2B1 | chr12 89534195 G A b38     | rs10858903  | 0,0000024 | 0,16  | Artery - Tibial                    |
| ENSG00000070961.15 | ATP2B1 | chr12 89539669 T C b38     | rs4842662   | 0,0000024 | 0,16  | Artery - Tibial                    |
| ENSG00000070961.15 | ATP2B1 | chr12 89539986 G C b38     | rs3741898   | 0,0000024 | 0,16  | Artery - Tibial                    |
| ENSG00000070961.15 | ATP2B1 | chr12 89540697 C T b38     | rs10858906  | 0,0000024 | 0,16  | Artery - Tibial                    |
| ENSG00000070961.15 | ATP2B1 | chr12 89541074 CAGAG C b38 | rs71897440  | 0,0000024 | 0,16  | Artery - Tibial                    |
| ENSG00000070961.15 | ATP2B1 | chr12 89541195 G C b38     | rs12369195  | 0,0000024 | 0,16  | Artery - Tibial                    |
| ENSG00000070961.15 | ATP2B1 | chr12 89528255 C A b38     | rs10858897  | 0,0000025 | 0,16  | Artery - Tibial                    |
| ENSG00000070961.15 | ATP2B1 | chr12 89535128 A G b38     | rs12369685  | 0,0000026 | 0,17  | Artery - Tibial                    |
| ENSG00000070961.15 | ATP2B1 | chr12 90068229 T C b38     | rs7310135   | 0,0000026 | -0,15 | Esophagus - Mucosa                 |
| ENSG00000070961.15 | ATP2B1 | chr12 90079906 G A b38     | rs6419356   | 0,0000026 | -0,15 | Esophagus - Mucosa                 |

|                    |        |                           |             |           |       |                    |
|--------------------|--------|---------------------------|-------------|-----------|-------|--------------------|
| ENSG00000070961.15 | ATP2B1 | chr12 90081169 G A b38    | rs7962435   | 0,0000026 | -0,15 | Esophagus - Mucosa |
| ENSG00000070961.15 | ATP2B1 | chr12 90084513 C T b38    | rs7132441   | 0,0000026 | -0,15 | Esophagus - Mucosa |
| ENSG00000070961.15 | ATP2B1 | chr12 89530034 G C b38    | rs10858899  | 0,0000027 | 0,16  | Artery - Tibial    |
| ENSG00000070961.15 | ATP2B1 | chr12 89530596 A ATCT b38 | rs112698976 | 0,0000027 | 0,16  | Artery - Tibial    |
| ENSG00000070961.15 | ATP2B1 | chr12 89530782 C T b38    | rs11105314  | 0,0000027 | 0,16  | Artery - Tibial    |
| ENSG00000070961.15 | ATP2B1 | chr12 89531423 T G b38    | rs11105316  | 0,0000027 | 0,16  | Artery - Tibial    |
| ENSG00000070961.15 | ATP2B1 | chr12 89933142 G A b38    | rs11105466  | 0,0000028 | -0,16 | Esophagus - Mucosa |
| ENSG00000070961.15 | ATP2B1 | chr12 89432148 T C b38    | rs10858848  | 0,0000029 | 0,16  | Artery - Tibial    |
| ENSG00000070961.15 | ATP2B1 | chr12 89497589 G A b38    | rs11105302  | 0,000003  | 0,16  | Artery - Tibial    |
| ENSG00000070961.15 | ATP2B1 | chr12 89497697 T G b38    | rs10858881  | 0,000003  | 0,16  | Artery - Tibial    |
| ENSG00000070961.15 | ATP2B1 | chr12 89441951 C A b38    | rs10858854  | 0,0000032 | 0,17  | Artery - Tibial    |
| ENSG00000070961.15 | ATP2B1 | chr12 89445295 C T b38    | rs11105291  | 0,0000032 | 0,17  | Artery - Tibial    |
| ENSG00000070961.15 | ATP2B1 | chr12 89445926 A G b38    | rs10858860  | 0,0000032 | 0,17  | Artery - Tibial    |
| ENSG00000070961.15 | ATP2B1 | chr12 90049705 A G b38    | rs10858945  | 0,0000032 | -0,15 | Esophagus - Mucosa |
| ENSG00000070961.15 | ATP2B1 | chr12 90050234 G T b38    | rs7958749   | 0,0000032 | -0,15 | Esophagus - Mucosa |
| ENSG00000070961.15 | ATP2B1 | chr12 89481583 G A b38    | rs75615848  | 0,0000035 | 0,32  | Artery - Tibial    |
| ENSG00000070961.15 | ATP2B1 | chr12 89439561 T C b38    | rs10858852  | 0,0000036 | 0,16  | Artery - Tibial    |
| ENSG00000070961.15 | ATP2B1 | chr12 89440336 C T b38    | rs4842653   | 0,0000036 | 0,16  | Artery - Tibial    |
| ENSG00000070961.15 | ATP2B1 | chr12 89440651 T A b38    | rs4842654   | 0,0000036 | 0,16  | Artery - Tibial    |
| ENSG00000070961.15 | ATP2B1 | chr12 89442082 C G b38    | rs10858855  | 0,0000036 | 0,16  | Artery - Tibial    |
| ENSG00000070961.15 | ATP2B1 | chr12 89442149 G A b38    | rs9795772   | 0,0000036 | 0,16  | Artery - Tibial    |
| ENSG00000070961.15 | ATP2B1 | chr12 89442895 G C b38    | rs11513812  | 0,0000036 | 0,16  | Artery - Tibial    |
| ENSG00000070961.15 | ATP2B1 | chr12 89443404 T C b38    | rs11105289  | 0,0000036 | 0,16  | Artery - Tibial    |
| ENSG00000070961.15 | ATP2B1 | chr12 89445026 A T b38    | rs11105290  | 0,0000036 | 0,16  | Artery - Tibial    |
| ENSG00000070961.15 | ATP2B1 | chr12 89445465 C T b38    | rs10858859  | 0,0000036 | 0,16  | Artery - Tibial    |
| ENSG00000070961.15 | ATP2B1 | chr12 89445949 A G b38    | rs10858861  | 0,0000036 | 0,16  | Artery - Tibial    |
| ENSG00000070961.15 | ATP2B1 | chr12 89448276 T C b38    | rs10858862  | 0,0000036 | 0,16  | Artery - Tibial    |
| ENSG00000070961.15 | ATP2B1 | chr12 89451080 T TG b38   | rs11461256  | 0,0000036 | 0,16  | Artery - Tibial    |
| ENSG00000070961.15 | ATP2B1 | chr12 89452453 C T b38    | rs10858864  | 0,0000036 | 0,16  | Artery - Tibial    |
| ENSG00000070961.15 | ATP2B1 | chr12 89452699 G A b38    | rs10858865  | 0,0000036 | 0,16  | Artery - Tibial    |
| ENSG00000070961.15 | ATP2B1 | chr12 89457389 C T b38    | rs10858867  | 0,0000036 | 0,16  | Artery - Tibial    |
| ENSG00000070961.15 | ATP2B1 | chr12 89463834 C T b38    | rs10858869  | 0,0000036 | 0,16  | Artery - Tibial    |
| ENSG00000070961.15 | ATP2B1 | chr12 89466542 C A b38    | rs3803128   | 0,0000036 | 0,16  | Artery - Tibial    |
| ENSG00000070961.15 | ATP2B1 | chr12 89467752 T C b38    | rs10506972  | 0,0000036 | 0,16  | Artery - Tibial    |
| ENSG00000070961.15 | ATP2B1 | chr12 89468253 G T b38    | rs12228177  | 0,0000036 | 0,16  | Artery - Tibial    |
| ENSG00000070961.15 | ATP2B1 | chr12 89477836 G A b38    | rs10858871  | 0,0000036 | 0,16  | Artery - Tibial    |
| ENSG00000070961.15 | ATP2B1 | chr12 89479155 C T b38    | rs10858872  | 0,0000036 | 0,16  | Artery - Tibial    |
| ENSG00000070961.15 | ATP2B1 | chr12 89483146 C T b38    | rs112511312 | 0,0000036 | 0,16  | Artery - Tibial    |
| ENSG00000070961.15 | ATP2B1 | chr12 89484166 A G b38    | rs11105299  | 0,0000036 | 0,16  | Artery - Tibial    |
| ENSG00000070961.15 | ATP2B1 | chr12 89487787 C G b38    | rs4842488   | 0,0000036 | 0,16  | Artery - Tibial    |
| ENSG00000070961.15 | ATP2B1 | chr12 89490501 C T b38    | rs10858877  | 0,0000036 | 0,16  | Artery - Tibial    |
| ENSG00000070961.15 | ATP2B1 | chr12 89490517 G A b38    | rs10858878  | 0,0000036 | 0,16  | Artery - Tibial    |
| ENSG00000070961.15 | ATP2B1 | chr12 89492146 C A b38    | rs6538189   | 0,0000036 | 0,16  | Artery - Tibial    |
| ENSG00000070961.15 | ATP2B1 | chr12 89492165 T C b38    | rs6538190   | 0,0000036 | 0,16  | Artery - Tibial    |
| ENSG00000070961.15 | ATP2B1 | chr12 89492801 T A b38    | rs10858879  | 0,0000036 | 0,16  | Artery - Tibial    |
| ENSG00000070961.15 | ATP2B1 | chr12 89493872 T C b38    | rs1008764   | 0,0000036 | 0,16  | Artery - Tibial    |
| ENSG00000070961.15 | ATP2B1 | chr12 89503120 C T b38    | rs10858885  | 0,0000036 | 0,16  | Artery - Tibial    |
| ENSG00000070961.15 | ATP2B1 | chr12 89503384 C G b38    | rs10858886  | 0,0000036 | 0,16  | Artery - Tibial    |
| ENSG00000070961.15 | ATP2B1 | chr12 89503557 C T b38    | rs11105305  | 0,0000036 | 0,16  | Artery - Tibial    |
| ENSG00000070961.15 | ATP2B1 | chr12 89503611 C T b38    | rs11105306  | 0,0000036 | 0,16  | Artery - Tibial    |
| ENSG00000070961.15 | ATP2B1 | chr12 89508827 G A b38    | rs10858889  | 0,0000036 | 0,16  | Artery - Tibial    |
| ENSG00000070961.15 | ATP2B1 | chr12 89513389 T C b38    | rs10858890  | 0,0000036 | 0,16  | Artery - Tibial    |
| ENSG00000070961.15 | ATP2B1 | chr12 89516073 T C b38    | rs11105309  | 0,0000036 | 0,16  | Artery - Tibial    |
| ENSG00000070961.15 | ATP2B1 | chr12 89519642 C T b38    | rs1054807   | 0,0000036 | 0,16  | Artery - Tibial    |
| ENSG00000070961.15 | ATP2B1 | chr12 89520484 T C b38    | rs10858894  | 0,0000036 | 0,16  | Artery - Tibial    |
| ENSG00000070961.15 | ATP2B1 | chr12 89529599 A T b38    | rs11105313  | 0,0000036 | 0,16  | Artery - Tibial    |
| ENSG00000070961.15 | ATP2B1 | chr12 90056289 A G b38    | rs12227543  | 0,0000036 | -0,15 | Esophagus - Mucosa |
| ENSG00000070961.15 | ATP2B1 | chr12 89524900 C A b38    | rs11105310  | 0,0000037 | 0,16  | Artery - Tibial    |
| ENSG00000070961.15 | ATP2B1 | chr12 89525791 C T b38    | rs10777184  | 0,0000037 | 0,16  | Artery - Tibial    |
| ENSG00000070961.15 | ATP2B1 | chr12 89526407 C T b38    | rs10858896  | 0,0000037 | 0,16  | Artery - Tibial    |
| ENSG00000070961.15 | ATP2B1 | chr12 89527500 G A b38    | rs10777186  | 0,0000037 | 0,16  | Artery - Tibial    |
| ENSG00000070961.15 | ATP2B1 | chr12 90052157 T C b38    | rs4842710   | 0,0000037 | -0,15 | Esophagus - Mucosa |
| ENSG00000070961.15 | ATP2B1 | chr12 90057274 A G b38    | rs10858947  | 0,0000037 | -0,15 | Esophagus - Mucosa |
| ENSG00000070961.15 | ATP2B1 | chr12 90068211 G A b38    | rs7139279   | 0,0000037 | -0,15 | Esophagus - Mucosa |
| ENSG00000070961.15 | ATP2B1 | chr12 90077187 C T b38    | rs7488228   | 0,0000037 | -0,15 | Esophagus - Mucosa |
| ENSG00000070961.15 | ATP2B1 | chr12 90083730 C T b38    | rs4842505   | 0,0000037 | -0,15 | Esophagus - Mucosa |
| ENSG00000070961.15 | ATP2B1 | chr12 90083900 C T b38    | rs7306280   | 0,0000037 | -0,15 | Esophagus - Mucosa |
| ENSG00000070961.15 | ATP2B1 | chr12 89996947 A G b38    | rs7953742   | 0,0000038 | -0,15 | Esophagus - Mucosa |
| ENSG00000070961.15 | ATP2B1 | chr12 89996827 CA C b38   | rs112780917 | 0,0000039 | -0,15 | Esophagus - Mucosa |
| ENSG00000070961.15 | ATP2B1 | chr12 90007154 C CA b38   | rs11396475  | 0,0000039 | -0,15 | Esophagus - Mucosa |
| ENSG00000070961.15 | ATP2B1 | chr12 90018978 A C b38    | rs4842705   | 0,0000039 | -0,15 | Esophagus - Mucosa |
| ENSG00000070961.15 | ATP2B1 | chr12 89531304 C A b38    | rs10858900  | 0,0000041 | 0,16  | Artery - Tibial    |



|                    |        |                                    |             |           |       |                                          |
|--------------------|--------|------------------------------------|-------------|-----------|-------|------------------------------------------|
| ENSG00000070961.15 | ATP2B1 | chr12_89536622_A_G_b38             | rs4842661   | 0,0000047 | 0,17  | Artery - Tibial                          |
| ENSG00000070961.15 | ATP2B1 | chr12_89539933_C_T_b38             | rs3825330   | 0,000005  | 0,16  | Artery - Tibial                          |
| ENSG00000070961.15 | ATP2B1 | chr12_89541610_C_T_b38             | rs10858909  | 0,000005  | 0,16  | Artery - Tibial                          |
| ENSG00000070961.15 | ATP2B1 | chr12_89544813_G_A_b38             | rs11105325  | 0,000005  | 0,16  | Artery - Tibial                          |
| ENSG00000070961.15 | ATP2B1 | chr12_90050964_A_G_b38             | rs10777222  | 0,000005  | -0,15 | Esophagus - Mucosa                       |
| ENSG00000070961.15 | ATP2B1 | chr12_89540154_G_A_b38             | rs3741899   | 0,0000051 | 0,16  | Artery - Tibial                          |
| ENSG00000070961.15 | ATP2B1 | chr12_90389431_C_T_b38             | rs1228496   | 0,0000052 | 0,49  | Brain - Substantia nigra                 |
| ENSG00000070961.15 | ATP2B1 | chr12_89528334_A_G_b38             | rs10858898  | 0,0000052 | 0,16  | Artery - Tibial                          |
| ENSG00000070961.15 | ATP2B1 | chr12_89544253_G_A_b38             | rs4842664   | 0,0000052 | 0,16  | Artery - Tibial                          |
| ENSG00000070961.15 | ATP2B1 | chr12_90510721_G_T_b38             | rs12578110  | 0,0000055 | 0,46  | Brain - Substantia nigra                 |
| ENSG00000070961.15 | ATP2B1 | chr12_89532881_G_A_b38             | rs11105318  | 0,0000056 | 0,16  | Artery - Tibial                          |
| ENSG00000070961.15 | ATP2B1 | chr12_89931928_T_C_b38             | rs7970120   | 0,0000063 | -0,21 | Artery - Tibial                          |
| ENSG00000070961.15 | ATP2B1 | chr12_89432335_C_G_b38             | rs11105286  | 0,0000064 | 0,15  | Artery - Tibial                          |
| ENSG00000070961.15 | ATP2B1 | chr12_90386667_C_T_b38             | rs6538234   | 0,0000083 | 0,51  | Brain - Substantia nigra                 |
| ENSG00000070961.15 | ATP2B1 | chr12_90388244_T_A_b38             | rs7979392   | 0,0000083 | 0,51  | Brain - Substantia nigra                 |
| ENSG00000070961.15 | ATP2B1 | chr12_90390285_G_C_b38             | rs2043213   | 0,0000083 | 0,51  | Brain - Substantia nigra                 |
| ENSG00000070961.15 | ATP2B1 | chr12_90398938_C_T_b38             | rs7955801   | 0,0000083 | 0,51  | Brain - Substantia nigra                 |
| ENSG00000070961.15 | ATP2B1 | chr12_90063091_G_A_b38             | rs6538220   | 0,0000084 | -0,15 | Esophagus - Mucosa                       |
| ENSG00000070961.15 | ATP2B1 | chr12_90516738_A_G_b38             | rs1347015   | 0,0000088 | 0,47  | Brain - Substantia nigra                 |
| ENSG00000070961.15 | ATP2B1 | chr12_90523189_C_T_b38             | rs1579534   | 0,0000088 | 0,47  | Brain - Substantia nigra                 |
| ENSG00000070961.15 | ATP2B1 | chr12_90510105_C_T_b38             | rs10858992  | 0,0000088 | 0,46  | Brain - Substantia nigra                 |
| ENSG00000070961.15 | ATP2B1 | chr12_90519613_A_T_b38             | rs61655253  | 0,0000088 | 0,46  | Brain - Substantia nigra                 |
| ENSG00000070961.15 | ATP2B1 | chr12_90528232_A_G_b38             | rs4274255   | 0,0000088 | 0,46  | Brain - Substantia nigra                 |
| ENSG00000070961.15 | ATP2B1 | chr12_90528837_C_T_b38             | rs11105663  | 0,0000088 | 0,46  | Brain - Substantia nigra                 |
| ENSG00000070961.15 | ATP2B1 | chr12_90532822_TTCTTAAGGACAA_T_b38 | rs6144807   | 0,0000088 | 0,46  | Brain - Substantia nigra                 |
| ENSG00000070961.15 | ATP2B1 | chr12_90533124_TA_T_b38            | rs36032096  | 0,0000088 | 0,46  | Brain - Substantia nigra                 |
| ENSG00000070961.15 | ATP2B1 | chr12_90535560_T_C_b38             | rs12580833  | 0,0000088 | 0,46  | Brain - Substantia nigra                 |
| ENSG00000070961.15 | ATP2B1 | chr12_90543285_C_T_b38             | rs11105668  | 0,0000088 | 0,46  | Brain - Substantia nigra                 |
| ENSG00000070961.15 | ATP2B1 | chr12_89780365_G_T_b38             | rs116990534 | 0,0000092 | 0,35  | Artery - Tibial                          |
| ENSG00000070961.15 | ATP2B1 | chr12_89719404_G_A_b38             | rs4842679   | 0,0000094 | -0,15 | Artery - Tibial                          |
| ENSG00000070961.15 | ATP2B1 | chr12_89504370_G_A_b38             | rs138808993 | 0,0000095 | 0,65  | Brain - Anterior cingulate cortex (BA24) |
| ENSG00000070961.15 | ATP2B1 | chr12_89538657_G_A_b38             | rs143285018 | 0,0000095 | 0,65  | Brain - Anterior cingulate cortex (BA24) |
| ENSG00000070961.15 | ATP2B1 | chr12_90129715_G_A_b38             | rs59313167  | 0,0000097 | -0,15 | Esophagus - Mucosa                       |
| ENSG00000070961.15 | ATP2B1 | chr12_90134908_C_T_b38             | rs7970711   | 0,0000097 | -0,15 | Esophagus - Mucosa                       |
| ENSG00000070961.15 | ATP2B1 | chr12_90136962_G_A_b38             | rs7979050   | 0,0000097 | -0,15 | Esophagus - Mucosa                       |
| ENSG00000070961.15 | ATP2B1 | chr12_89959608_C_T_b38             | rs11105474  | 0,00001   | -0,14 | Esophagus - Mucosa                       |
| ENSG00000070961.15 | ATP2B1 | chr12_89622750_A_G_b38             | rs147471906 | 0,000011  | 0,59  | Brain - Anterior cingulate cortex (BA24) |
| ENSG00000070961.15 | ATP2B1 | chr12_89643621_G_A_b38             | rs149731397 | 0,000011  | 0,59  | Brain - Anterior cingulate cortex (BA24) |
| ENSG00000070961.15 | ATP2B1 | chr12_90394122_TTTC_T_b38          | rs10543504  | 0,000011  | 0,52  | Brain - Substantia nigra                 |
| ENSG00000070961.15 | ATP2B1 | chr12_90385245_G_A_b38             | rs1594565   | 0,000011  | 0,5   | Brain - Substantia nigra                 |
| ENSG00000070961.15 | ATP2B1 | chr12_90088859_T_C_b38             | rs11105501  | 0,000011  | -0,15 | Esophagus - Mucosa                       |
| ENSG00000070961.15 | ATP2B1 | chr12_90089663_G_A_b38             | rs11105503  | 0,000011  | -0,15 | Esophagus - Mucosa                       |
| ENSG00000070961.15 | ATP2B1 | chr12_90089938_C_T_b38             | rs11105504  | 0,000011  | -0,15 | Esophagus - Mucosa                       |
| ENSG00000070961.15 | ATP2B1 | chr12_89926004_G_A_b38             | rs111342256 | 0,000012  | 0,65  | Artery - Tibial                          |
| ENSG00000070961.15 | ATP2B1 | chr12_90195090_A_G_b38             | rs10858967  | 0,000012  | -0,34 | Cells - EBV-transformed lymphocytes      |
| ENSG00000070961.15 | ATP2B1 | chr12_90407150_G_A_b38             | rs7969733   | 0,000013  | 0,34  | Brain - Spinal cord (cervical c-1)       |
| ENSG00000070961.15 | ATP2B1 | chr12_90411424_C_G_b38             | rs10777244  | 0,000013  | 0,34  | Brain - Spinal cord (cervical c-1)       |
| ENSG00000070961.15 | ATP2B1 | chr12_90411690_G_A_b38             | rs7958205   | 0,000013  | 0,34  | Brain - Spinal cord (cervical c-1)       |
| ENSG00000070961.15 | ATP2B1 | chr12_90411780_G_A_b38             | rs7958308   | 0,000013  | 0,34  | Brain - Spinal cord (cervical c-1)       |
| ENSG00000070961.15 | ATP2B1 | chr12_90414020_G_T_b38             | rs7966452   | 0,000013  | 0,34  | Brain - Spinal cord (cervical c-1)       |
| ENSG00000070961.15 | ATP2B1 | chr12_90414588_CT_C_b38            | rs35829324  | 0,000013  | 0,34  | Brain - Spinal cord (cervical c-1)       |
| ENSG00000070961.15 | ATP2B1 | chr12_90416671_A_G_b38             | rs2897862   | 0,000013  | 0,34  | Brain - Spinal cord (cervical c-1)       |
| ENSG00000070961.15 | ATP2B1 | chr12_90416672_A_T_b38             | rs2408160   | 0,000013  | 0,34  | Brain - Spinal cord (cervical c-1)       |
| ENSG00000070961.15 | ATP2B1 | chr12_90422109_C_T_b38             | rs7315821   | 0,000013  | 0,34  | Brain - Spinal cord (cervical c-1)       |
| ENSG00000070961.15 | ATP2B1 | chr12_90425535_T_A_b38             | rs6538235   | 0,000013  | 0,34  | Brain - Spinal cord (cervical c-1)       |
| ENSG00000070961.15 | ATP2B1 | chr12_90427858_G_A_b38             | rs10777245  | 0,000013  | 0,34  | Brain - Spinal cord (cervical c-1)       |

|                    |        |                          |             |          |       |                                    |
|--------------------|--------|--------------------------|-------------|----------|-------|------------------------------------|
| ENSG00000070961.15 | ATP2B1 | chr12_90430064_C_G_b38   | rs6538236   | 0,000013 | 0,34  | Brain - Spinal cord (cervical c-1) |
| ENSG00000070961.15 | ATP2B1 | chr12_90436231_T_C_b38   | rs1835768   | 0,000013 | 0,34  | Brain - Spinal cord (cervical c-1) |
| ENSG00000070961.15 | ATP2B1 | chr12_90436298_G_A_b38   | rs1835767   | 0,000013 | 0,34  | Brain - Spinal cord (cervical c-1) |
| ENSG00000070961.15 | ATP2B1 | chr12_90439201_G_A_b38   | rs34234695  | 0,000013 | 0,34  | Brain - Spinal cord (cervical c-1) |
| ENSG00000070961.15 | ATP2B1 | chr12_90439855_C_T_b38   | rs11105617  | 0,000013 | 0,34  | Brain - Spinal cord (cervical c-1) |
| ENSG00000070961.15 | ATP2B1 | chr12_90443686_G_A_b38   | rs66955893  | 0,000013 | 0,34  | Brain - Spinal cord (cervical c-1) |
| ENSG00000070961.15 | ATP2B1 | chr12_90451488_G_A_b38   | rs11105622  | 0,000013 | 0,34  | Brain - Spinal cord (cervical c-1) |
| ENSG00000070961.15 | ATP2B1 | chr12_90452503_C_T_b38   | rs7960740   | 0,000013 | 0,34  | Brain - Spinal cord (cervical c-1) |
| ENSG00000070961.15 | ATP2B1 | chr12_90457546_A_T_b38   | rs11105623  | 0,000013 | 0,34  | Brain - Spinal cord (cervical c-1) |
| ENSG00000070961.15 | ATP2B1 | chr12_90468635_G_A_b38   | rs7954409   | 0,000013 | 0,34  | Brain - Spinal cord (cervical c-1) |
| ENSG00000070961.15 | ATP2B1 | chr12_90474639_G_A_b38   | rs1864782   | 0,000013 | 0,34  | Brain - Spinal cord (cervical c-1) |
| ENSG00000070961.15 | ATP2B1 | chr12_90476135_C_T_b38   | rs7298940   | 0,000013 | 0,34  | Brain - Spinal cord (cervical c-1) |
| ENSG00000070961.15 | ATP2B1 | chr12_90478226_G_A_b38   | rs12818545  | 0,000013 | 0,34  | Brain - Spinal cord (cervical c-1) |
| ENSG00000070961.15 | ATP2B1 | chr12_90482472_AAC_A_b38 | rs67668093  | 0,000013 | 0,34  | Brain - Spinal cord (cervical c-1) |
| ENSG00000070961.15 | ATP2B1 | chr12_90484858_C_T_b38   | rs7311599   | 0,000013 | 0,34  | Brain - Spinal cord (cervical c-1) |
| ENSG00000070961.15 | ATP2B1 | chr12_90559065_T_A_b38   | rs2520561   | 0,000013 | 0,31  | Brain - Spinal cord (cervical c-1) |
| ENSG00000070961.15 | ATP2B1 | chr12_90391772_A_C_b38   | rs7976895   | 0,000014 | 0,48  | Brain - Substantia nigra           |
| ENSG00000070961.15 | ATP2B1 | chr12_90392860_A_C_b38   | rs2116497   | 0,000014 | 0,48  | Brain - Substantia nigra           |
| ENSG00000070961.15 | ATP2B1 | chr12_90393455_G_A_b38   | rs12580873  | 0,000014 | 0,48  | Brain - Substantia nigra           |
| ENSG00000070961.15 | ATP2B1 | chr12_90552916_G_A_b38   | rs2520567   | 0,000014 | 0,44  | Brain - Substantia nigra           |
| ENSG00000070961.15 | ATP2B1 | chr12_90001825_T_C_b38   | rs17192565  | 0,000014 | 0,43  | Artery - Tibial                    |
| ENSG00000070961.15 | ATP2B1 | chr12_90459042_T_A_b38   | rs7132660   | 0,000014 | 0,34  | Brain - Spinal cord (cervical c-1) |
| ENSG00000070961.15 | ATP2B1 | chr12_90106317_C_CAT_b38 | rs148143712 | 0,000015 | -0,15 | Esophagus - Mucosa                 |
| ENSG00000070961.15 | ATP2B1 | chr12_90112140_G_A_b38   | rs7966278   | 0,000015 | -0,15 | Esophagus - Mucosa                 |
| ENSG00000070961.15 | ATP2B1 | chr12_89556543_A_C_b38   | rs7302816   | 0,000016 | 0,19  | Artery - Aorta                     |
| ENSG00000070961.15 | ATP2B1 | chr12_89422110_G_A_b38   | rs80277599  | 0,000017 | 1,4   | Brain - Hypothalamus               |
| ENSG00000070961.15 | ATP2B1 | chr12_89428758_A_G_b38   | rs112370308 | 0,000017 | 1,4   | Brain - Hypothalamus               |
| ENSG00000070961.15 | ATP2B1 | chr12_89441431_T_C_b38   | rs113025676 | 0,000017 | 1,4   | Brain - Hypothalamus               |
| ENSG00000070961.15 | ATP2B1 | chr12_89457067_C_T_b38   | rs61435009  | 0,000017 | 1,4   | Brain - Hypothalamus               |
| ENSG00000070961.15 | ATP2B1 | chr12_89471149_A_G_b38   | rs74754458  | 0,000017 | 1,4   | Brain - Hypothalamus               |
| ENSG00000070961.15 | ATP2B1 | chr12_89478671_T_C_b38   | rs60772618  | 0,000017 | 1,4   | Brain - Hypothalamus               |
| ENSG00000070961.15 | ATP2B1 | chr12_89484136_C_G_b38   | rs74543833  | 0,000017 | 1,4   | Brain - Hypothalamus               |
| ENSG00000070961.15 | ATP2B1 | chr12_89487042_C_G_b38   | rs58117070  | 0,000017 | 1,4   | Brain - Hypothalamus               |
| ENSG00000070961.15 | ATP2B1 | chr12_89488169_C_T_b38   | rs185300284 | 0,000017 | 1,4   | Brain - Hypothalamus               |
| ENSG00000070961.15 | ATP2B1 | chr12_89488792_C_T_b38   | rs76672752  | 0,000017 | 1,4   | Brain - Hypothalamus               |
| ENSG00000070961.15 | ATP2B1 | chr12_89490053_G_T_b38   | rs78332000  | 0,000017 | 1,4   | Brain - Hypothalamus               |
| ENSG00000070961.15 | ATP2B1 | chr12_90581088_T_TA_b38  | rs143922775 | 0,000017 | 1,4   | Brain - Hypothalamus               |
| ENSG00000070961.15 | ATP2B1 | chr12_90583461_C_T_b38   | rs17018043  | 0,000017 | 1,4   | Brain - Hypothalamus               |
| ENSG00000070961.15 | ATP2B1 | chr12_90586839_A_G_b38   | rs73358180  | 0,000017 | 1,4   | Brain - Hypothalamus               |
| ENSG00000070961.15 | ATP2B1 | chr12_90589431_T_C_b38   | rs73358183  | 0,000017 | 1,4   | Brain - Hypothalamus               |
| ENSG00000070961.15 | ATP2B1 | chr12_90593192_C_T_b38   | rs73358194  | 0,000017 | 1,4   | Brain - Hypothalamus               |
| ENSG00000070961.15 | ATP2B1 | chr12_90594592_G_A_b38   | rs2106528   | 0,000017 | 1,4   | Brain - Hypothalamus               |
| ENSG00000070961.15 | ATP2B1 | chr12_90599502_C_T_b38   | rs76134788  | 0,000017 | 1,4   | Brain - Hypothalamus               |
| ENSG00000070961.15 | ATP2B1 | chr12_90602009_G_C_b38   | rs73360109  | 0,000017 | 1,4   | Brain - Hypothalamus               |
| ENSG00000070961.15 | ATP2B1 | chr12_90602975_T_C_b38   | rs73360112  | 0,000017 | 1,4   | Brain - Hypothalamus               |
| ENSG00000070961.15 | ATP2B1 | chr12_90603192_A_G_b38   | rs17018088  | 0,000017 | 1,4   | Brain - Hypothalamus               |
| ENSG00000070961.15 | ATP2B1 | chr12_90606864_CAG_C_b38 | rs34639687  | 0,000017 | 1,4   | Brain - Hypothalamus               |
| ENSG00000070961.15 | ATP2B1 | chr12_90608792_A_G_b38   | rs7306918   | 0,000017 | 1,4   | Brain - Hypothalamus               |
| ENSG00000070961.15 | ATP2B1 | chr12_90609936_C_T_b38   | rs73360125  | 0,000017 | 1,4   | Brain - Hypothalamus               |
| ENSG00000070961.15 | ATP2B1 | chr12_90614576_G_T_b38   | rs73360133  | 0,000017 | 1,4   | Brain - Hypothalamus               |
| ENSG00000070961.15 | ATP2B1 | chr12_90626419_G_T_b38   | rs11829105  | 0,000017 | 1,4   | Brain - Hypothalamus               |
| ENSG00000070961.15 | ATP2B1 | chr12_90626488_A_T_b38   | rs11833692  | 0,000017 | 1,4   | Brain - Hypothalamus               |
| ENSG00000070961.15 | ATP2B1 | chr12_90628581_A_G_b38   | rs73360170  | 0,000017 | 1,4   | Brain - Hypothalamus               |
| ENSG00000070961.15 | ATP2B1 | chr12_90646115_A_G_b38   | rs11830515  | 0,000017 | 1,4   | Brain - Hypothalamus               |
| ENSG00000070961.15 | ATP2B1 | chr12_90650906_T_C_b38   | rs11105723  | 0,000017 | 1,4   | Brain - Hypothalamus               |
| ENSG00000070961.15 | ATP2B1 | chr12_90661217_T_C_b38   | rs11105730  | 0,000017 | 1,4   | Brain - Hypothalamus               |

|                    |        |                             |              |          |       |                                          |
|--------------------|--------|-----------------------------|--------------|----------|-------|------------------------------------------|
| ENSG00000070961.15 | ATP2B1 | chr12_89525853_ACC_A_b38    | rs67346689   | 0,000017 | 0,16  | Artery - Tibial                          |
| ENSG00000070961.15 | ATP2B1 | chr12_90637101_TTG_T_b38    | rs1491580271 | 0,000018 | 1,4   | Brain - Hypothalamus                     |
| ENSG00000070961.15 | ATP2B1 | chr12_90136354_G_A_b38      | rs143689254  | 0,000018 | 0,68  | Brain - Anterior cingulate cortex (BA24) |
| ENSG00000070961.15 | ATP2B1 | chr12_90241276_A_G_b38      | rs73196463   | 0,000018 | 0,62  | Artery - Tibial                          |
| ENSG00000070961.15 | ATP2B1 | chr12_90554733_G_A_b38      | rs2520565    | 0,000018 | 0,44  | Brain - Substantia nigra                 |
| ENSG00000070961.15 | ATP2B1 | chr12_90556726_A_G_b38      | rs2520563    | 0,000018 | 0,44  | Brain - Substantia nigra                 |
| ENSG00000070961.15 | ATP2B1 | chr12_90557663_C_T_b38      | rs2520562    | 0,000018 | 0,44  | Brain - Substantia nigra                 |
| ENSG00000070961.15 | ATP2B1 | chr12_90558072_T_C_b38      | rs2723917    | 0,000018 | 0,44  | Brain - Substantia nigra                 |
| ENSG00000070961.15 | ATP2B1 | chr12_89569279_G_A_b38      | rs372643302  | 0,000018 | 0,17  | Artery - Tibial                          |
| ENSG00000070961.15 | ATP2B1 | chr12_89950918_A_G_b38      | rs7294671    | 0,000018 | -0,13 | Esophagus - Mucosa                       |
| ENSG00000070961.15 | ATP2B1 | chr12_89956338_C_G_b38      | rs11105473   | 0,000018 | -0,14 | Esophagus - Mucosa                       |
| ENSG00000070961.15 | ATP2B1 | chr12_89957460_T_G_b38      | rs7132526    | 0,000018 | -0,14 | Esophagus - Mucosa                       |
| ENSG00000070961.15 | ATP2B1 | chr12_89704243_G_A_b38      | rs61926784   | 0,000019 | 0,19  | Brain - Frontal Cortex (BA9)             |
| ENSG00000070961.15 | ATP2B1 | chr12_90326873_G_T_b38      | rs825954     | 0,000023 | -0,15 | Esophagus - Muscularis                   |
| ENSG00000070961.15 | ATP2B1 | chr12_90329398_C_T_b38      | rs10858974   | 0,000024 | -0,13 | Thyroid                                  |
| ENSG00000070961.15 | ATP2B1 | chr12_90299326_G_A_b38      | rs11105563   | 0,000024 | -0,35 | Cells - EBV-transformed lymphocytes      |
| ENSG00000070961.15 | ATP2B1 | chr12_89876539_G_A_b38      | rs74851539   | 0,000025 | 0,41  | Artery - Tibial                          |
| ENSG00000070961.15 | ATP2B1 | chr12_89940862_G_A_b38      | rs12368259   | 0,000027 | 0,22  | Esophagus - Mucosa                       |
| ENSG00000070961.15 | ATP2B1 | chr12_90299488_G_C_b38      | rs10506984   | 0,000027 | -0,34 | Cells - EBV-transformed lymphocytes      |
| ENSG00000070961.15 | ATP2B1 | chr12_90303890_G_C_b38      | rs2056699    | 0,000027 | -0,34 | Cells - EBV-transformed lymphocytes      |
| ENSG00000070961.15 | ATP2B1 | chr12_90306554_G_A_b38      | rs1587440    | 0,000027 | -0,34 | Cells - EBV-transformed lymphocytes      |
| ENSG00000070961.15 | ATP2B1 | chr12_90311197_C_T_b38      | rs10858971   | 0,000027 | -0,34 | Cells - EBV-transformed lymphocytes      |
| ENSG00000070961.15 | ATP2B1 | chr12_90631370_A_T_b38      | rs11105706   | 0,000028 | -0,28 | Colon - Transverse                       |
| ENSG00000070961.15 | ATP2B1 | chr12_90631458_A_G_b38      | rs11105707   | 0,000028 | -0,28 | Colon - Transverse                       |
| ENSG00000070961.15 | ATP2B1 | chr12_90632378_G_A_b38      | rs11105709   | 0,000028 | -0,28 | Colon - Transverse                       |
| ENSG00000070961.15 | ATP2B1 | chr12_90636015_C_A_b38      | rs11105712   | 0,000028 | -0,28 | Colon - Transverse                       |
| ENSG00000070961.15 | ATP2B1 | chr12_90638508_T_A_b38      | rs112784216  | 0,000028 | -0,28 | Colon - Transverse                       |
| ENSG00000070961.15 | ATP2B1 | chr12_90451210_G_A_b38      | rs1148676    | 0,000029 | 0,3   | Brain - Spinal cord (cervical c-1)       |
| ENSG00000070961.15 | ATP2B1 | chr12_89973104_A_G_b38      | rs10777215   | 0,000029 | -0,13 | Esophagus - Mucosa                       |
| ENSG00000070961.15 | ATP2B1 | chr12_89999628_A_ATTTC_b38  | rs10671258   | 0,000029 | -0,13 | Esophagus - Mucosa                       |
| ENSG00000070961.15 | ATP2B1 | chr12_90000940_A_G_b38      | rs4406875    | 0,000029 | -0,13 | Esophagus - Mucosa                       |
| ENSG00000070961.15 | ATP2B1 | chr12_90005097_T_A_b38      | rs4240746    | 0,000029 | -0,13 | Esophagus - Mucosa                       |
| ENSG00000070961.15 | ATP2B1 | chr12_89559134_C_T_b38      | rs112417857  | 0,000031 | 0,54  | Artery - Tibial                          |
| ENSG00000070961.15 | ATP2B1 | chr12_89394010_T_C_b38      | rs11105273   | 0,000031 | 0,18  | Artery - Tibial                          |
| ENSG00000070961.15 | ATP2B1 | chr12_89975574_A_G_b38      | rs7303123    | 0,000031 | -0,13 | Esophagus - Mucosa                       |
| ENSG00000070961.15 | ATP2B1 | chr12_89976239_C_T_b38      | rs10777216   | 0,000031 | -0,13 | Esophagus - Mucosa                       |
| ENSG00000070961.15 | ATP2B1 | chr12_89957885_A_G_b38      | rs4842700    | 0,000032 | -0,18 | Artery - Tibial                          |
| ENSG00000070961.15 | ATP2B1 | chr12_90287401_C_T_b38      | rs11105559   | 0,000032 | -0,34 | Cells - EBV-transformed lymphocytes      |
| ENSG00000070961.15 | ATP2B1 | chr12_90295570_G_A_b38      | rs2165035    | 0,000032 | -0,34 | Cells - EBV-transformed lymphocytes      |
| ENSG00000070961.15 | ATP2B1 | chr12_90273379_C_A_b38      | rs12320693   | 0,000033 | -0,37 | Cells - EBV-transformed lymphocytes      |
| ENSG00000070961.15 | ATP2B1 | chr12_89995520_A_C_b38      | rs6538214    | 0,000034 | -0,13 | Esophagus - Mucosa                       |
| ENSG00000070961.15 | ATP2B1 | chr12_90007782_T_TATAAA_b38 | rs57291885   | 0,000034 | -0,13 | Esophagus - Mucosa                       |
| ENSG00000070961.15 | ATP2B1 | chr12_90008924_A_C_b38      | rs4842504    | 0,000034 | -0,13 | Esophagus - Mucosa                       |
| ENSG00000070961.15 | ATP2B1 | chr12_90018772_T_C_b38      | rs10858942   | 0,000034 | -0,13 | Esophagus - Mucosa                       |
| ENSG00000070961.15 | ATP2B1 | chr12_90061403_T_C_b38      | rs7303035    | 0,000037 | -0,13 | Esophagus - Mucosa                       |
| ENSG00000070961.15 | ATP2B1 | chr12_89042639_G_A_b38      | rs76671707   | 0,000037 | -0,57 | Lung                                     |
| ENSG00000070961.15 | ATP2B1 | chr12_90266564_G_A_b38      | rs1347846    | 0,000039 | -0,33 | Cells - EBV-transformed lymphocytes      |
| ENSG00000070961.15 | ATP2B1 | chr12_90259816_T_C_b38      | rs4381424    | 0,000039 | -0,34 | Cells - EBV-transformed lymphocytes      |
| ENSG00000070961.15 | ATP2B1 | chr12_90303378_AT_A_b38     | rs141511768  | 0,000039 | -0,36 | Cells - EBV-transformed lymphocytes      |
| ENSG00000070961.15 | ATP2B1 | chr12_90275487_CAA_C_b38    | rs3042884    | 0,000041 | -0,35 | Cells - EBV-transformed lymphocytes      |
| ENSG00000070961.15 | ATP2B1 | chr12_90328476_T_C_b38      | rs1405527    | 0,000042 | -0,13 | Thyroid                                  |
| ENSG00000070961.15 | ATP2B1 | chr12_90330109_G_A_b38      | rs12818395   | 0,000042 | -0,13 | Thyroid                                  |
| ENSG00000070961.15 | ATP2B1 | chr12_90150155_C_T_b38      | rs7135166    | 0,000042 | -0,14 | Esophagus - Mucosa                       |
| ENSG00000070961.15 | ATP2B1 | chr12_89709017_C_A_b38      | rs12369944   | 0,000044 | 0,18  | Brain - Frontal Cortex (BA9)             |
| ENSG00000070961.15 | ATP2B1 | chr12_89966286_A_G_b38      | rs10745520   | 0,000044 | -0,13 | Esophagus - Mucosa                       |
| ENSG00000070961.15 | ATP2B1 | chr12_89702020_T_A_b38      | rs11105380   | 0,000045 | -0,14 | Artery - Tibial                          |
| ENSG00000070961.15 | ATP2B1 | chr12_90153750_C_G_b38      | rs2118803    | 0,000047 | -0,14 | Esophagus - Mucosa                       |

|                    |        |                            |             |          |       |                        |
|--------------------|--------|----------------------------|-------------|----------|-------|------------------------|
| ENSG00000070961.15 | ATP2B1 | chr12 90568565 A G b38     | rs35520023  | 0,000048 | 0,13  | Adipose - Subcutaneous |
| ENSG00000070961.15 | ATP2B1 | chr12 90629207 G A b38     | rs11105704  | 0,000048 | -0,27 | Colon - Transverse     |
| ENSG00000070961.15 | ATP2B1 | chr12 89666809 G A b38     | rs17249754  | 0,000051 | 0,19  | Artery - Aorta         |
| ENSG00000070961.15 | ATP2B1 | chr12 89668599 G A b38     | rs6538195   | 0,000051 | 0,19  | Artery - Aorta         |
| ENSG00000070961.15 | ATP2B1 | chr12 89678299 G A b38     | rs73437358  | 0,000051 | 0,19  | Artery - Aorta         |
| ENSG00000070961.15 | ATP2B1 | chr12 89913265 C T b38     | rs7972820   | 0,000053 | -0,13 | Esophagus - Mucosa     |
| ENSG00000070961.15 | ATP2B1 | chr12 89784106 A T b38     | rs113133867 | 0,000054 | 0,55  | Artery - Tibial        |
| ENSG00000070961.15 | ATP2B1 | chr12 89632685 G A b38     | rs11105352  | 0,000054 | 0,19  | Artery - Aorta         |
| ENSG00000070961.15 | ATP2B1 | chr12 89632686 C A b38     | rs11105353  | 0,000054 | 0,19  | Artery - Aorta         |
| ENSG00000070961.15 | ATP2B1 | chr12 89632746 A G b38     | rs11105354  | 0,000054 | 0,19  | Artery - Aorta         |
| ENSG00000070961.15 | ATP2B1 | chr12 89656726 A G b38     | rs12579302  | 0,000054 | 0,19  | Artery - Aorta         |
| ENSG00000070961.15 | ATP2B1 | chr12 89665065 G A b38     | rs111478946 | 0,000054 | 0,19  | Artery - Aorta         |
| ENSG00000070961.15 | ATP2B1 | chr12 89675499 T G b38     | rs11105364  | 0,000054 | 0,19  | Artery - Aorta         |
| ENSG00000070961.15 | ATP2B1 | chr12 90158457 G GT b38    | rs79468373  | 0,000054 | -0,14 | Esophagus - Mucosa     |
| ENSG00000070961.15 | ATP2B1 | chr12 89909790 G C b38     | rs7957657   | 0,000057 | -0,13 | Esophagus - Mucosa     |
| ENSG00000070961.15 | ATP2B1 | chr12 90328476 T C b38     | rs1405527   | 0,000057 | -0,15 | Esophagus - Muscularis |
| ENSG00000070961.15 | ATP2B1 | chr12 90329398 C T b38     | rs10858974  | 0,000057 | -0,15 | Esophagus - Muscularis |
| ENSG00000070961.15 | ATP2B1 | chr12 90330109 G A b38     | rs12818395  | 0,000057 | -0,15 | Esophagus - Muscularis |
| ENSG00000070961.15 | ATP2B1 | chr12 90026116 GT G b38    | rs11324040  | 0,000058 | -0,13 | Esophagus - Mucosa     |
| ENSG00000070961.15 | ATP2B1 | chr12 89629273 T C b38     | rs116858620 | 0,00006  | 0,43  | Lung                   |
| ENSG00000070961.15 | ATP2B1 | chr12 90035251 A G b38     | rs7311631   | 0,00006  | -0,13 | Esophagus - Mucosa     |
| ENSG00000070961.15 | ATP2B1 | chr12 89879521 G A b38     | rs2553100   | 0,00006  | -0,13 | Esophagus - Mucosa     |
| ENSG00000070961.15 | ATP2B1 | chr12 89944741 G A b38     | rs4842698   | 0,000062 | -0,18 | Artery - Tibial        |
| ENSG00000070961.15 | ATP2B1 | chr12 89680664 G C b38     | rs11105368  | 0,000063 | 0,19  | Artery - Aorta         |
| ENSG00000070961.15 | ATP2B1 | chr12 90577787 T C b38     | rs11105685  | 0,000063 | 0,13  | Adipose - Subcutaneous |
| ENSG00000070961.15 | ATP2B1 | chr12 89681466 C T b38     | rs4842675   | 0,000065 | 0,19  | Artery - Aorta         |
| ENSG00000070961.15 | ATP2B1 | chr12 89619312 T C b38     | rs2681492   | 0,000066 | 0,19  | Artery - Aorta         |
| ENSG00000070961.15 | ATP2B1 | chr12 89615182 A G b38     | rs2681472   | 0,000066 | 0,19  | Artery - Aorta         |
| ENSG00000070961.15 | ATP2B1 | chr12 89956222 G A b38     | rs10777213  | 0,000066 | -0,13 | Esophagus - Mucosa     |
| ENSG00000070961.15 | ATP2B1 | chr12 89958659 C T b38     | rs7306228   | 0,000066 | -0,13 | Esophagus - Mucosa     |
| ENSG00000070961.15 | ATP2B1 | chr12 90039790 A G b38     | rs6538218   | 0,000066 | -0,13 | Esophagus - Mucosa     |
| ENSG00000070961.15 | ATP2B1 | chr12 89912752 T C b38     | rs7135197   | 0,000067 | -0,13 | Esophagus - Mucosa     |
| ENSG00000070961.15 | ATP2B1 | chr12 89915156 G A b38     | rs7959788   | 0,000067 | -0,13 | Esophagus - Mucosa     |
| ENSG00000070961.15 | ATP2B1 | chr12 90152680 A G b38     | rs10745525  | 0,000068 | -0,18 | Artery - Tibial        |
| ENSG00000070961.15 | ATP2B1 | chr12 89837533 A G b38     | rs2722224   | 0,000079 | -0,13 | Esophagus - Mucosa     |
| ENSG00000070961.15 | ATP2B1 | chr12 89696964 C T b38     | rs11105378  | 0,00008  | 0,19  | Artery - Aorta         |
| ENSG00000070961.15 | ATP2B1 | chr12 89695013 G A b38     | rs10858917  | 0,00008  | -0,17 | Artery - Aorta         |
| ENSG00000070961.15 | ATP2B1 | chr12 90050278 C T b38     | rs55846104  | 0,000081 | -0,19 | Esophagus - Mucosa     |
| ENSG00000070961.15 | ATP2B1 | chr12 90147932 C T b38     | rs4608145   | 0,000083 | -0,13 | Lung                   |
| ENSG00000070961.15 | ATP2B1 | chr12 90087601 T C b38     | rs7316395   | 0,000087 | -0,13 | Lung                   |
| ENSG00000070961.15 | ATP2B1 | chr12 90087981 A G b38     | rs7300611   | 0,000087 | -0,13 | Lung                   |
| ENSG00000070961.15 | ATP2B1 | chr12 90089145 A G b38     | rs10735278  | 0,000087 | -0,13 | Lung                   |
| ENSG00000070961.15 | ATP2B1 | chr12 90089249 A T b38     | rs10735279  | 0,000087 | -0,13 | Lung                   |
| ENSG00000070961.15 | ATP2B1 | chr12 90089939 T G b38     | rs10858950  | 0,000087 | -0,13 | Lung                   |
| ENSG00000070961.15 | ATP2B1 | chr12 90090107 T C b38     | rs11105505  | 0,000087 | -0,13 | Lung                   |
| ENSG00000070961.15 | ATP2B1 | chr12 89966684 C T b38     | rs4584633   | 0,00009  | -0,17 | Artery - Tibial        |
| ENSG00000070961.15 | ATP2B1 | chr12 89921101 C G b38     | rs4842693   | 0,000093 | -0,13 | Esophagus - Mucosa     |
| ENSG00000070961.15 | ATP2B1 | chr12 90133970 C T b38     | rs11105516  | 0,000094 | -0,13 | Lung                   |
| ENSG00000070961.15 | ATP2B1 | chr12 90022580 A C b38     | rs10777219  | 0,000094 | -0,14 | Artery - Tibial        |
| ENSG00000070961.15 | ATP2B1 | chr12 90024345 G A b38     | rs10858943  | 0,000094 | -0,14 | Artery - Tibial        |
| ENSG00000070961.15 | ATP2B1 | chr12 90157130 AT A b38    | rs34734819  | 0,000099 | -0,13 | Esophagus - Mucosa     |
| ENSG00000070961.15 | ATP2B1 | chr12 89694803 T A b38     | rs11105375  | 0,0001   | 0,18  | Artery - Aorta         |
| ENSG00000070961.15 | ATP2B1 | chr12 89697090 A G b38     | rs12230074  | 0,0001   | 0,18  | Artery - Aorta         |
| ENSG00000070961.15 | ATP2B1 | chr12 90148406 A C b38     | rs1438984   | 0,0001   | -0,13 | Lung                   |
| ENSG00000070961.15 | ATP2B1 | chr12 90148426 G A b38     | rs1438983   | 0,0001   | -0,13 | Lung                   |
| ENSG00000070961.15 | ATP2B1 | chr12 90042305 C T b38     | rs7975953   | 0,0001   | -0,14 | Artery - Tibial        |
| ENSG00000070961.15 | ATP2B1 | chr12 90042794 T C b38     | rs7963304   | 0,0001   | -0,14 | Artery - Tibial        |
| ENSG00000070961.15 | ATP2B1 | chr12 90110385 A C b38     | rs10858955  | 0,00011  | -0,13 | Lung                   |
| ENSG00000070961.15 | ATP2B1 | chr12 90111572 G A b38     | rs10745523  | 0,00011  | -0,13 | Lung                   |
| ENSG00000070961.15 | ATP2B1 | chr12 90114532 G T b38     | rs10777224  | 0,00011  | -0,13 | Lung                   |
| ENSG00000070961.15 | ATP2B1 | chr12 90120301 C G b38     | rs10858956  | 0,00011  | -0,13 | Lung                   |
| ENSG00000070961.15 | ATP2B1 | chr12 89336143 A C b38     | rs10161308  | 0,00012  | 0,22  | Artery - Tibial        |
| ENSG00000070961.15 | ATP2B1 | chr12 89660842 T C b38     | rs73437338  | 0,00012  | 0,19  | Artery - Aorta         |
| ENSG00000070961.15 | ATP2B1 | chr12 89591515 AAAGT A b38 | rs10580742  | 0,00012  | 0,19  | Artery - Aorta         |
| ENSG00000070961.15 | ATP2B1 | chr12 89677042 CAAAG C b38 | rs143087380 | 0,00012  | -0,11 | Thyroid                |
| ENSG00000070961.15 | ATP2B1 | chr12 90099780 G A b38     | rs7486390   | 0,00012  | -0,13 | Lung                   |
| ENSG00000070961.15 | ATP2B1 | chr12 90100728 G C b38     | rs7303398   | 0,00012  | -0,13 | Lung                   |
| ENSG00000070961.15 | ATP2B1 | chr12 89694991 G A b38     | rs11105376  | 0,00013  | 0,19  | Artery - Aorta         |
| ENSG00000070961.15 | ATP2B1 | chr12 90117803 G C b38     | rs7486630   | 0,00013  | -0,13 | Lung                   |
| ENSG00000070961.15 | ATP2B1 | chr12 90119438 T A b38     | rs7139353   | 0,00013  | -0,13 | Lung                   |
| ENSG00000070961.15 | ATP2B1 | chr12 90121102 T C b38     | rs10777226  | 0,00013  | -0,13 | Lung                   |
| ENSG00000070961.15 | ATP2B1 | chr12 90122191 G C b38     | rs6538227   | 0,00013  | -0,13 | Lung                   |

|                    |        |                           |             |         |       |                    |
|--------------------|--------|---------------------------|-------------|---------|-------|--------------------|
| ENSG00000070961.15 | ATP2B1 | chr12 90123327 G T b38    | rs10858957  | 0,00013 | -0,13 | Lung               |
| ENSG00000070961.15 | ATP2B1 | chr12 90123338 T C b38    | rs10858958  | 0,00013 | -0,13 | Lung               |
| ENSG00000070961.15 | ATP2B1 | chr12 90124075 G A b38    | rs7315166   | 0,00013 | -0,13 | Lung               |
| ENSG00000070961.15 | ATP2B1 | chr12 90124724 G A b38    | rs4842713   | 0,00013 | -0,13 | Lung               |
| ENSG00000070961.15 | ATP2B1 | chr12 90126369 C T b38    | rs7138547   | 0,00013 | -0,13 | Lung               |
| ENSG00000070961.15 | ATP2B1 | chr12 90127423 A G b38    | rs10777227  | 0,00013 | -0,13 | Lung               |
| ENSG00000070961.15 | ATP2B1 | chr12 90127443 A G b38    | rs10777228  | 0,00013 | -0,13 | Lung               |
| ENSG00000070961.15 | ATP2B1 | chr12 90128789 G A b38    | rs12303180  | 0,00013 | -0,13 | Lung               |
| ENSG00000070961.15 | ATP2B1 | chr12 90129235 T C b38    | rs4842714   | 0,00013 | -0,13 | Lung               |
| ENSG00000070961.15 | ATP2B1 | chr12 90130357 GCTC G b38 | rs35647353  | 0,00013 | -0,13 | Lung               |
| ENSG00000070961.15 | ATP2B1 | chr12 90132074 G T b38    | rs10858961  | 0,00013 | -0,13 | Lung               |
| ENSG00000070961.15 | ATP2B1 | chr12 90133198 A AG b38   | rs79553876  | 0,00013 | -0,13 | Lung               |
| ENSG00000070961.15 | ATP2B1 | chr12 90134620 G C b38    | rs6538228   | 0,00013 | -0,13 | Lung               |
| ENSG00000070961.15 | ATP2B1 | chr12 90137321 T C b38    | rs1595599   | 0,00013 | -0,13 | Lung               |
| ENSG00000070961.15 | ATP2B1 | chr12 90137388 G A b38    | rs1595598   | 0,00013 | -0,13 | Lung               |
| ENSG00000070961.15 | ATP2B1 | chr12 90137720 T G b38    | rs7304226   | 0,00013 | -0,13 | Lung               |
| ENSG00000070961.15 | ATP2B1 | chr12 90139086 C T b38    | rs7295818   | 0,00013 | -0,13 | Lung               |
| ENSG00000070961.15 | ATP2B1 | chr12 90141861 G T b38    | rs1438986   | 0,00013 | -0,13 | Lung               |
| ENSG00000070961.15 | ATP2B1 | chr12 90142076 T G b38    | rs1438985   | 0,00013 | -0,13 | Lung               |
| ENSG00000070961.15 | ATP2B1 | chr12 90142537 C A b38    | rs1470031   | 0,00013 | -0,13 | Lung               |
| ENSG00000070961.15 | ATP2B1 | chr12 90142786 G A b38    | rs1470030   | 0,00013 | -0,13 | Lung               |
| ENSG00000070961.15 | ATP2B1 | chr12 90144066 A C b38    | rs10745524  | 0,00013 | -0,13 | Lung               |
| ENSG00000070961.15 | ATP2B1 | chr12 90144234 A G b38    | rs1470029   | 0,00013 | -0,13 | Lung               |
| ENSG00000070961.15 | ATP2B1 | chr12 90144899 A T b38    | rs4842715   | 0,00013 | -0,13 | Lung               |
| ENSG00000070961.15 | ATP2B1 | chr12 90145400 C A b38    | rs4842716   | 0,00013 | -0,13 | Lung               |
| ENSG00000070961.15 | ATP2B1 | chr12 90145401 C T b38    | rs4842717   | 0,00013 | -0,13 | Lung               |
| ENSG00000070961.15 | ATP2B1 | chr12 90145987 C A b38    | rs1344962   | 0,00013 | -0,13 | Lung               |
| ENSG00000070961.15 | ATP2B1 | chr12 90146644 T C b38    | rs11105517  | 0,00013 | -0,13 | Lung               |
| ENSG00000070961.15 | ATP2B1 | chr12 90147279 C G b38    | rs1344961   | 0,00013 | -0,13 | Lung               |
| ENSG00000070961.15 | ATP2B1 | chr12 90147385 C G b38    | rs2218085   | 0,00013 | -0,13 | Lung               |
| ENSG00000070961.15 | ATP2B1 | chr12 90147644 A C b38    | rs2196783   | 0,00013 | -0,13 | Lung               |
| ENSG00000070961.15 | ATP2B1 | chr12 90002703 T C b38    | rs7964216   | 0,00013 | -0,14 | Artery - Tibial    |
| ENSG00000070961.15 | ATP2B1 | chr12 90004485 T C b38    | rs10777218  | 0,00013 | -0,14 | Artery - Tibial    |
| ENSG00000070961.15 | ATP2B1 | chr12 90005574 C T b38    | rs11105483  | 0,00013 | -0,14 | Artery - Tibial    |
| ENSG00000070961.15 | ATP2B1 | chr12 90015717 C T b38    | rs61926987  | 0,00013 | -0,14 | Artery - Tibial    |
| ENSG00000070961.15 | ATP2B1 | chr12 90159905 G A b38    | rs6538230   | 0,00014 | -0,16 | Artery - Tibial    |
| ENSG00000070961.15 | ATP2B1 | chr12 89547597 G A b38    | rs4842665   | 0,00015 | 0,12  | Artery - Tibial    |
| ENSG00000070961.15 | ATP2B1 | chr12 89865713 T C b38    | rs2722213   | 0,00015 | -0,12 | Esophagus - Mucosa |
| ENSG00000070961.15 | ATP2B1 | chr12 89866278 G A b38    | rs2553097   | 0,00015 | -0,12 | Esophagus - Mucosa |
| ENSG00000070961.15 | ATP2B1 | chr12 89875126 G A b38    | rs2553104   | 0,00015 | -0,12 | Esophagus - Mucosa |
| ENSG00000070961.15 | ATP2B1 | chr12 90071866 G A b38    | rs6538222   | 0,00015 | -0,13 | Lung               |
| ENSG00000070961.15 | ATP2B1 | chr12 89851601 T C b38    | rs2553101   | 0,00015 | -0,13 | Esophagus - Mucosa |
| ENSG00000070961.15 | ATP2B1 | chr12 89637618 C T b38    | rs10858914  | 0,00017 | -0,12 | Artery - Tibial    |
| ENSG00000070961.15 | ATP2B1 | chr12 90010069 T C b38    | rs4393376   | 0,00017 | -0,15 | Artery - Tibial    |
| ENSG00000070961.15 | ATP2B1 | chr12 90016872 A C b38    | rs6538217   | 0,00017 | -0,15 | Artery - Tibial    |
| ENSG00000070961.15 | ATP2B1 | chr12 89904501 A C b38    | rs7965284   | 0,00017 | -0,18 | Artery - Tibial    |
| ENSG00000070961.15 | ATP2B1 | chr12 90128372 C T b38    | rs10858959  | 0,00019 | -0,13 | Artery - Tibial    |
| ENSG00000070961.15 | ATP2B1 | chr12 90129926 G A b38    | rs10858960  | 0,00019 | -0,13 | Artery - Tibial    |
| ENSG00000070961.15 | ATP2B1 | chr12 89943230 A C b38    | rs4842696   | 0,0002  | -0,14 | Esophagus - Mucosa |
| ENSG00000070961.15 | ATP2B1 | chr12 89345678 C G b38    | rs11105262  | 0,00022 | 0,21  | Artery - Tibial    |
| ENSG00000070961.15 | ATP2B1 | chr12 89861997 C A b38    | rs1946327   | 0,00023 | -0,12 | Esophagus - Mucosa |
| ENSG00000070961.15 | ATP2B1 | chr12 90003409 T C b38    | rs4453292   | 0,00023 | -0,15 | Artery - Tibial    |
| ENSG00000070961.15 | ATP2B1 | chr12 90162353 T C b38    | rs2731241   | 0,00023 | -0,16 | Artery - Tibial    |
| ENSG00000070961.15 | ATP2B1 | chr12 90164205 A G b38    | rs1438980   | 0,00023 | -0,16 | Artery - Tibial    |
| ENSG00000070961.15 | ATP2B1 | chr12 89434120 G A b38    | rs118130015 | 0,00027 | 0,33  | Artery - Tibial    |
| ENSG00000070961.15 | ATP2B1 | chr12 90173201 C T b38    | rs1347851   | 0,00027 | -0,15 | Artery - Tibial    |
| ENSG00000070961.15 | ATP2B1 | chr12 89623959 G T b38    | rs2070759   | 0,00028 | -0,11 | Artery - Tibial    |
| ENSG00000070961.15 | ATP2B1 | chr12 89646107 G A b38    | rs939329    | 0,00028 | -0,11 | Artery - Tibial    |
| ENSG00000070961.15 | ATP2B1 | chr12 90149730 G A b38    | rs10777230  | 0,00028 | -0,12 | Artery - Tibial    |
| ENSG00000070961.15 | ATP2B1 | chr12 89857319 C T b38    | rs12371308  | 0,00028 | -0,13 | Artery - Tibial    |
| ENSG00000070961.15 | ATP2B1 | chr12 89857983 T C b38    | rs11105439  | 0,00028 | -0,13 | Artery - Tibial    |

**Appendix table S4. eQTLs SNPs for the *ATP2B1* gene from the “Genotype-Tissue Expression” (GTEx) database ( $P < 1 \times 10^{-6}$ ).**

In-silico analysis pipeline identifying the presence of noncoding variants in the *ATP2B1* locus located in putative elements responsible for transcriptional regulation (EQTls). The 77 SNPs that act as eQTLs for the *ATP2B1* gene annotated with prediction functional scores calculated from the “Genome-Wide Annotation of Variants” GWAVA tool. Eight SNPs are not reported in GWAVA, and are thus excluded. Data given include ID, chromosome, position, and region score. Bold: the top six SNPs selected.

| <b>ID</b>          | <b>Chr.</b> | <b>Position</b>   | <b>Region score</b> |
|--------------------|-------------|-------------------|---------------------|
| <b>rs11105352</b>  | <b>12</b>   | <b>90.026.462</b> | <b>0,63</b>         |
| <b>rs11105353</b>  | <b>12</b>   | <b>90.026.463</b> | <b>0,61</b>         |
| <b>rs10777221</b>  | <b>12</b>   | <b>90.441.215</b> | <b>0,52</b>         |
| <b>rs73437358</b>  | <b>12</b>   | <b>90.072.076</b> | <b>0,48</b>         |
| <b>rs111337717</b> | <b>12</b>   | <b>90.037.506</b> | <b>0,47</b>         |
| <b>rs2681492</b>   | <b>12</b>   | <b>90.013.089</b> | <b>0,47</b>         |
| rs7136259          | 12          | 90.081.188        | 0,46                |
| rs17249754         | 12          | 90.060.586        | 0,43                |
| rs11105382         | 12          | 90.107.272        | 0,43                |
| rs73437338         | 12          | 90.054.619        | 0,42                |
| rs2280715          | 12          | 90.103.702        | 0,42                |
| rs149193253        | 12          | 90.418.172        | 0,42                |
| rs4842699          | 12          | 90.345.607        | 0,41                |
| rs114744356        | 12          | 90.400.573        | 0,41                |
| rs7488223          | 12          | 90.404.051        | 0,41                |
| rs11105354         | 12          | 90.026.523        | 0,4                 |
| rs11105337         | 12          | 89.993.507        | 0,39                |
| rs2681472          | 12          | 90.008.959        | 0,39                |
| rs11105364         | 12          | 90.069.276        | 0,39                |
| rs10777217         | 12          | 90.385.294        | 0,39                |
| rs10745511         | 12          | 90.097.667        | 0,38                |
| rs2408046          | 12          | 90.109.337        | 0,38                |
| rs1401982          | 12          | 89.989.599        | 0,37                |
| rs12579302         | 12          | 90.050.503        | 0,37                |
| rs4842675          | 12          | 90.075.243        | 0,37                |
| rs11105379         | 12          | 90.095.173        | 0,37                |
| rs7299436          | 12          | 90.113.070        | 0,37                |
| rs73208536         | 12          | 90.428.028        | 0,37                |
| rs8181784          | 12          | 89.828.591        | 0,36                |
| rs10777163         | 12          | 89.830.720        | 0,36                |
| rs6538195          | 12          | 90.062.376        | 0,35                |
| rs4842676          | 12          | 90.091.782        | 0,35                |
| rs2113894          | 12          | 90.099.397        | 0,35                |
| rs1980235          | 12          | 90.110.782        | 0,35                |
| rs7488974          | 12          | 90.442.001        | 0,35                |
| rs150184539        | 12          | 90.443.478        | 0,35                |
| rs150119566        | 12          | 90.537.682        | 0,35                |
| rs12230074         | 12          | 90.090.867        | 0,34                |
| rs1358350          | 12          | 90.101.892        | 0,34                |
| rs73437382         | 12          | 90.102.945        | 0,34                |
| rs11105381         | 12          | 90.106.835        | 0,34                |
| rs2681485          | 12          | 90.025.622        | 0,33                |

|             |    |            |      |
|-------------|----|------------|------|
| rs11105368  | 12 | 90.074.441 | 0,33 |
| rs11105378  | 12 | 90.090.741 | 0,33 |
| rs7313874   | 12 | 89.965.049 | 0,32 |
| rs1689040   | 12 | 89.978.233 | 0,32 |
| rs111478946 | 12 | 90.058.842 | 0,32 |
| rs11105383  | 12 | 90.107.306 | 0,32 |
| rs12579052  | 12 | 90.132.147 | 0,32 |
| rs1594565   | 12 | 90.779.022 | 0,32 |
| rs10858918  | 12 | 90.096.345 | 0,31 |
| rs4408360   | 12 | 90.394.861 | 0,31 |
| rs11105287  | 12 | 89.829.470 | 0,3  |
| rs7968803   | 12 | 90.390.780 | 0,3  |
| rs4842666   | 12 | 89.941.549 | 0,29 |
| rs11105328  | 12 | 89.942.390 | 0,29 |
| rs10858917  | 12 | 90.088.790 | 0,29 |
| rs7302816   | 12 | 89.950.320 | 0,28 |
| rs1590008   | 12 | 90.107.725 | 0,28 |
| rs4466894   | 12 | 90.362.052 | 0,27 |
| rs55849728  | 12 | 90.533.915 | 0,27 |
| rs11105375  | 12 | 90.088.580 | 0,26 |
| rs4842697   | 12 | 90.337.046 | 0,26 |
| rs77187603  | 12 | 90.531.484 | 0,25 |
| rs10858944  | 12 | 90.419.192 | 0,24 |
| rs11105376  | 12 | 90.088.768 | 0,23 |
| rs4842701   | 12 | 90.367.700 | 0,19 |
| rs117742247 | 12 | 89.991.313 | 0,16 |
| rs57481061  | 12 | 90.019.178 | 0,14 |

**Appendix table S5. Differentially expressed genes in HEK-293T edited cells**

Differentially expressed (DE) genes comparing differentially expressed genes from RNAseq analyses comparing HEK293T (WT T/T) and isogenic generated clones (C/C). Data given include gene name, BaseMean (average of the normalized count values), FoldChange, log2Fold Change, pValue and BH adjusted p value are listed.

| <b>Gene Symbol</b> | <b>C.C. / T.T.<br/>base Mean</b> | <b>C.C. / T.T.<br/>Fold change</b> | <b>C.C. / T.T.<br/>Log2 Fold change</b> | <b>C.C. / T.T.<br/>.raw. pval</b> | <b>C.C. / T.T.<br/>.bh. pval</b> |
|--------------------|----------------------------------|------------------------------------|-----------------------------------------|-----------------------------------|----------------------------------|
| TMEM189-UBE2V1     | 83,432186                        | -8,030776                          | 0,449601396                             | 2,31086E-11                       | 4,1064E-07                       |
| CCND1              | 1001,397770                      | -5,516491                          | 0,398915171                             | 6,5693E-10                        | 5,83682E-06                      |
| BRINP3             | 286,533286                       | 2,984710                           | 0,262334776                             | 1,81388E-09                       | 1,07442E-05                      |
| SGPP2              | 407,418822                       | -2,731977                          | 0,265271423                             | 4,60582E-08                       | 0,000204614                      |
| ACTRT3             | 160,576777                       | 2,871753                           | 0,284993336                             | 9,28257E-08                       | 0,000329903                      |
| KCNB1              | 82,902050                        | -8,504763                          | 0,594124921                             | 2,01426E-07                       | 0,000596558                      |
| UBAC2-AS1          | 137,141414                       | 3,239612                           | 0,33518791                              | 4,20766E-07                       | 0,00097994                       |
| LOC105274304       | 42,515853                        | 5,209731                           | 0,471500485                             | 4,41166E-07                       | 0,00097994                       |
| DECR1              | 969,930136                       | 2,615839                           | 0,279833059                             | 7,14043E-07                       | 0,001409838                      |
| TUNAR              | 59,840352                        | -7,617012                          | 0,598726825                             | 9,96018E-07                       | 0,001769925                      |
| AIFM2              | 413,442074                       | 3,150496                           | 0,344923044                             | 1,58785E-06                       | 0,002565095                      |
| IFI30              | 824,717238                       | 2,366240                           | 0,263042902                             | 2,31328E-06                       | 0,003425588                      |
| LINC00839          | 176,086803                       | -3,580646                          | 0,400302795                             | 4,28474E-06                       | 0,00585691                       |
| IFIT1              | 334,126293                       | 2,561404                           | 0,306536035                             | 9,56975E-06                       | 0,012146741                      |
| ZNF442             | 58,360208                        | -5,030546                          | 0,538613852                             | 1,50985E-05                       | 0,017471828                      |
| LOC105374338       | 57,358380                        | -10,111528                         | 0,772992986                             | 1,57315E-05                       | 0,017471828                      |
| STC1               | 61,570815                        | -13,594827                         | 0,874836971                             | 1,68012E-05                       | 0,017562241                      |
| TP53I3             | 647,230208                       | 3,278584                           | 0,404223866                             | 2,25589E-05                       | 0,020025016                      |
| SORCS1             | 580,443344                       | -5,656138                          | 0,587216634                             | 2,07132E-05                       | 0,020025016                      |
| C11orf96           | 232,808814                       | -3,155106                          | 0,391077311                             | 2,24744E-05                       | 0,020025016                      |
| ETNPPL             | 89,902382                        | 2,369733                           | 0,29823272                              | 2,99735E-05                       | 0,02417569                       |
| MAP6               | 113,007758                       | -2,857277                          | 0,364924211                             | 3,31659E-05                       | 0,024556566                      |
| NAALAD2            | 172,160859                       | 2,522826                           | 0,324404345                             | 3,86575E-05                       | 0,027025416                      |
| CRTAC1             | 151,000507                       | -3,739295                          | 0,464430892                             | 4,18567E-05                       | 0,027025416                      |
| ZNF83              | 296,337238                       | -4,632727                          | 0,540401733                             | 4,25837E-05                       | 0,027025416                      |
| SLC9A9             | 260,880735                       | 2,474374                           | 0,318723781                             | 4,11494E-05                       | 0,027025416                      |
| DUSP4              | 199,388914                       | -3,327344                          | 0,425797324                             | 4,63653E-05                       | 0,027463719                      |
| CACNA1C            | 285,991249                       | -2,298536                          | 0,300564281                             | 6,47297E-05                       | 0,032293583                      |
| KCND3              | 60,278431                        | -3,500644                          | 0,453509921                             | 6,72404E-05                       | 0,032293583                      |
| TAC1               | 32,763155                        | -6,635666                          | 0,679767066                             | 5,90848E-05                       | 0,032293583                      |
| HCAR1              | 30,689060                        | 3,294148                           | 0,427826276                             | 5,81729E-05                       | 0,032293583                      |
| SH3BGRL3           | 1332,907483                      | 2,280879                           | 0,297318012                             | 6,30567E-05                       | 0,032293583                      |
| ZFAS1              | 3127,906649                      | -2,477187                          | 0,326245427                             | 6,03582E-05                       | 0,032293583                      |
| INSC               | 111,875918                       | -5,631494                          | 0,631212073                             | 7,80323E-05                       | 0,034665871                      |



|              |             |           |             |             |             |
|--------------|-------------|-----------|-------------|-------------|-------------|
| CA5BP1-CA5B  | 466,096834  | -2,141693 | 0,27781154  | 7,65262E-05 | 0,034665871 |
| CALCB        | 550,253073  | -3,207646 | 0,427394581 | 8,34263E-05 | 0,034945057 |
| FAM189A1     | 428,197582  | -2,040489 | 0,261739715 | 8,45715E-05 | 0,034945057 |
| SLC10A4      | 97,279503   | 2,640249  | 0,356808371 | 8,65269E-05 | 0,034945057 |
| LOC105376600 | 64,661519   | 2,868588  | 0,3861753   | 8,25346E-05 | 0,034945057 |
| APOBEC3B     | 398,824054  | 4,451726  | 0,552665277 | 9,69358E-05 | 0,038278864 |
| MYO7A        | 138,110413  | 3,845872  | 0,500531182 | 0,000103389 | 0,039405917 |
| MIR503HG     | 382,949889  | 2,740963  | 0,377910205 | 0,000118465 | 0,042102402 |
| DTX4         | 43,232806   | -2,915700 | 0,404222777 | 0,000133839 | 0,044873876 |
| RASGRP1      | 252,508176  | -2,536054 | 0,353223386 | 0,000144141 | 0,047433015 |
| GPR85        | 89,893659   | 3,055436  | 0,424745359 | 0,000148388 | 0,047942902 |
| INSM1        | 333,792159  | -2,640916 | 0,370350247 | 0,000154944 | 0,049167057 |
| FOXL2NB      | 69,535137   | 2,242507  | 0,310092596 | 0,000171754 | 0,051335806 |
| ZNF887P      | 141,080914  | -2,027753 | 0,271087935 | 0,000168438 | 0,051335806 |
| BCL11B       | 128,012163  | -2,141969 | 0,293595502 | 0,000181812 | 0,052964053 |
| TNFSF12      | 92,089181   | 5,655907  | 0,674469239 | 0,000210342 | 0,057504346 |
| GFRA3        | 101,151302  | 6,134739  | 0,711668641 | 0,000235738 | 0,061603889 |
| FAM131B      | 181,464732  | -5,544801 | 0,674009661 | 0,000246065 | 0,063370689 |
| ZNF44        | 448,348209  | -2,660575 | 0,386100663 | 0,000255784 | 0,064017982 |
| UNC5A        | 171,595731  | -2,055024 | 0,284091889 | 0,000254375 | 0,064017982 |
| HLA-DPB1     | 257,589645  | 4,096743  | 0,557369411 | 0,000262095 | 0,0646866   |
| H4C11        | 59,272138   | 3,145864  | 0,456588286 | 0,000293094 | 0,070382225 |
| SERPINB9     | 222,213079  | 2,565982  | 0,376759785 | 0,000308057 | 0,072028525 |
| DCDC2        | 111,351198  | 3,554733  | 0,508187792 | 0,00031758  | 0,073290751 |
| B3GAT1       | 55,924350   | -6,020004 | 0,721809715 | 0,000333382 | 0,075951172 |
| H4C12        | 52,248215   | 2,875846  | 0,428253452 | 0,000372825 | 0,083861984 |
| ITGA8        | 1480,265031 | 2,565157  | 0,383623932 | 0,000396122 | 0,087988497 |
| EGR2         | 57,211147   | -3,256387 | 0,48351939  | 0,000427247 | 0,090382994 |
| CREG2        | 138,836938  | -3,811626 | 0,547340446 | 0,000420481 | 0,090382994 |
| GLT8D2       | 491,209835  | 2,068799  | 0,298657443 | 0,000445259 | 0,093085281 |
| MAGEH1       | 23,032460   | 3,765570  | 0,545761431 | 0,000456687 | 0,094364358 |
| KCNA3        | 174,522777  | -5,306064 | 0,694577979 | 0,0005276   | 0,099863623 |
| KCNH2        | 367,978109  | -2,119386 | 0,312378761 | 0,000522372 | 0,099863623 |
| PPP2R2C      | 623,556841  | -3,178508 | 0,480416645 | 0,000515224 | 0,099863623 |
| H2BC11       | 104,296047  | 3,505272  | 0,521191634 | 0,000516785 | 0,099863623 |
| H2BC12       | 5516,018025 | 2,972387  | 0,452599321 | 0,000515759 | 0,099863623 |
| TMEM271      | 66,685863   | -5,078329 | 0,683493121 | 0,000603671 | 0,107272367 |
| TNC          | 225,868755  | -3,865169 | 0,569370153 | 0,000613059 | 0,107861917 |
| MPPED1       | 79,902676   | -2,725473 | 0,422693183 | 0,000621349 | 0,10824876  |
| GRIP2        | 536,880773  | -2,409086 | 0,374771203 | 0,000712575 | 0,121754415 |
| H2BC4        | 158,261088  | 3,957894  | 0,587408093 | 0,000728037 | 0,123145543 |
| PLEKHB1      | 991,447366  | 2,364495  | 0,3682189   | 0,000746997 | 0,124057381 |
| CXCL12       | 497,709536  | 2,440144  | 0,383127391 | 0,000781944 | 0,127469281 |
| IGSF21       | 19,475213   | -3,463513 | 0,533943272 | 0,000789061 | 0,127469281 |
| CCDC144CP    | 89,717015   | -2,343600 | 0,367716468 | 0,000833258 | 0,132440319 |

|              |             |           |             |             |             |
|--------------|-------------|-----------|-------------|-------------|-------------|
| LOC105374985 | 122,075149  | 3,935212  | 0,591569805 | 0,000834739 | 0,132440319 |
| UTS2R        | 669,584487  | 2,216588  | 0,345007443 | 0,000873299 | 0,135418787 |
| WFIKKN2      | 26,461499   | 3,677875  | 0,564654428 | 0,000876374 | 0,135418787 |
| H3C10        | 84,134491   | 4,237925  | 0,627580818 | 0,000901255 | 0,138062951 |
| EPSTI1       | 127,915454  | 2,507306  | 0,400637841 | 0,000932738 | 0,140464055 |
| H2AC19       | 254,781970  | 3,581659  | 0,55686518  | 0,000948618 | 0,141654904 |
| NHS          | 387,764739  | -2,075790 | 0,320358692 | 0,001005432 | 0,146278352 |
| H2AC18       | 241,818396  | 3,582827  | 0,560110286 | 0,001012506 | 0,146278352 |
| CNFN         | 134,566492  | 2,034835  | 0,311705432 | 0,00100874  | 0,146278352 |
| LOC102724334 | 45,875395   | 4,157796  | 0,626222775 | 0,001027497 | 0,147246965 |
| H2BS1        | 47,617542   | 4,141893  | 0,627330158 | 0,001082034 | 0,15260112  |
| RBP1         | 498,109755  | 2,335820  | 0,375359291 | 0,001111426 | 0,155512164 |
| MYT1         | 336,558529  | -2,496780 | 0,405195824 | 0,001122582 | 0,155845922 |
| IGSF10       | 166,452007  | 2,822054  | 0,460107759 | 0,001141803 | 0,157285548 |
| CLCNKB       | 71,124774   | 2,626501  | 0,429119494 | 0,001168278 | 0,15854326  |
| CD2BP2-DT    | 102,902309  | 2,125394  | 0,33505821  | 0,001168777 | 0,15854326  |
| SCN2A        | 118,744369  | 4,382325  | 0,660897543 | 0,001257718 | 0,166966859 |
| LOC105377101 | 43,642001   | 2,453621  | 0,401504402 | 0,001259064 | 0,166966859 |
| GABBR2       | 275,256463  | -2,302025 | 0,37357461  | 0,001281988 | 0,167174498 |
| ADPRHL1      | 206,292022  | 2,044902  | 0,320362946 | 0,001275461 | 0,167174498 |
| GET1-SH3BGR  | 244,495810  | -4,533027 | 0,678679707 | 0,001314393 | 0,169251913 |
| MYD88        | 450,900886  | 2,744254  | 0,45372257  | 0,001327711 | 0,1697369   |
| CHRNA4       | 93,363994   | -5,174757 | 0,743578819 | 0,001426209 | 0,175792593 |
| NOTUM        | 121,190271  | -2,438830 | 0,402652245 | 0,00140174  | 0,175792593 |
| ABHD14A-ACY1 | 86,989168   | 4,121113  | 0,640588902 | 0,001426147 | 0,175792593 |
| RN7SL832P    | 86,608086   | 2,603285  | 0,432534517 | 0,001416503 | 0,175792593 |
| PCDH1        | 249,128800  | -3,070607 | 0,514882728 | 0,001669514 | 0,193903631 |
| FSTL4        | 105,636621  | -3,452507 | 0,568575036 | 0,001666109 | 0,193903631 |
| LOC105379452 | 18,840817   | -7,236213 | 0,91124622  | 0,001728351 | 0,196876904 |
| LOC107987172 | 224,587454  | -2,233874 | 0,369907133 | 0,001720297 | 0,196876904 |
| CHGA         | 52,623770   | 2,281134  | 0,380346509 | 0,001759575 | 0,197896488 |
| NEFL         | 3076,889048 | -2,324726 | 0,39182036  | 0,001895273 | 0,211817637 |
| IRS2         | 774,762114  | -2,430070 | 0,412667393 | 0,001908012 | 0,211908554 |
| DGUOK-AS1    | 61,009747   | 3,091032  | 0,525311791 | 0,001939911 | 0,214113167 |
| RIC3         | 16,087736   | -6,163998 | 0,849278443 | 0,002004773 | 0,219906273 |
| LOC105372431 | 20,335433   | -3,024195 | 0,517910682 | 0,002051481 | 0,223616918 |
| OSTN         | 265,011136  | -4,127151 | 0,669869737 | 0,002265276 | 0,235513736 |
| KCP          | 63,009142   | 3,034456  | 0,524561128 | 0,002266339 | 0,235513736 |
| B4GALNT4     | 1789,211576 | -2,360494 | 0,406635152 | 0,002310023 | 0,23865763  |
| H2AC20       | 38,358109   | 3,148083  | 0,544654169 | 0,002384238 | 0,243495518 |
| GAPDHP21     | 66,226989   | 2,039074  | 0,338965735 | 0,002425363 | 0,243495518 |
| H2BC21       | 467,016242  | 2,680520  | 0,470178014 | 0,002482406 | 0,247822236 |
| CD70         | 238,434988  | -2,135637 | 0,362964621 | 0,00256215  | 0,252686977 |
| ZNF804A      | 161,621028  | 2,502031  | 0,442391564 | 0,002782586 | 0,26727862  |

|              |             |           |             |             |             |
|--------------|-------------|-----------|-------------|-------------|-------------|
| PDGFA        | 321,135004  | -2,431151 | 0,432302092 | 0,003029935 | 0,284755132 |
| H2AC6        | 159,268699  | 3,655072  | 0,632378301 | 0,003107166 | 0,288759469 |
| LOC105376043 | 16,002502   | -7,968389 | 1,013067823 | 0,003119967 | 0,288759469 |
| LAMA2        | 84,810986   | 2,212674  | 0,390290428 | 0,003327536 | 0,30168526  |
| HLA-DRB1     | 261,379742  | 2,361657  | 0,423085885 | 0,003385552 | 0,305387139 |
| C1R          | 326,419676  | 2,102984  | 0,366464971 | 0,003428663 | 0,306167512 |
| CDO1         | 280,605339  | 2,471103  | 0,446550508 | 0,003469559 | 0,308270276 |
| PTX3         | 196,772221  | -3,196000 | 0,575713778 | 0,003595448 | 0,310480211 |
| H4C8         | 36,880186   | 4,138057  | 0,703235663 | 0,003572774 | 0,310480211 |
| LINC00673    | 63,137675   | -2,367503 | 0,426173496 | 0,003528355 | 0,310480211 |
| RNF103-CHMP3 | 23,006288   | 4,909577  | 0,790049364 | 0,003665034 | 0,313975487 |
| DUSP5        | 188,637928  | -2,127848 | 0,376078681 | 0,003770855 | 0,315387624 |
| LGALS1       | 484,005465  | 3,165096  | 0,574286868 | 0,00379814  | 0,315387624 |
| RSU1         | 4483,402702 | 2,096227  | 0,368836706 | 0,003791163 | 0,315387624 |
| LOC100506691 | 154,987603  | -2,603430 | 0,477442577 | 0,003836928 | 0,317126558 |
| MAFF         | 183,948512  | -2,747302 | 0,506155611 | 0,003969603 | 0,321912334 |
| C2orf50      | 30,828723   | 2,691050  | 0,496331917 | 0,004009059 | 0,321912334 |
| PAXIP1-AS2   | 96,613543   | 2,093501  | 0,370134505 | 0,003979131 | 0,321912334 |
| PPM1F-AS1    | 126,491921  | 2,321619  | 0,422439835 | 0,00402164  | 0,321912334 |
| RPL41P3      | 994,823529  | -6,363841 | 0,930643075 | 0,004119357 | 0,326790034 |
| ZNF441       | 217,268996  | -2,460594 | 0,453645679 | 0,004190123 | 0,327153842 |
| MIR3659HG    | 35,909683   | -2,917769 | 0,539273373 | 0,004173825 | 0,327153842 |
| IFI6         | 516,531609  | 2,037603  | 0,359182836 | 0,00425093  | 0,328430553 |
| FAM20A       | 18,469118   | -4,573073 | 0,769258599 | 0,004358061 | 0,330435232 |
| PHF21B       | 829,424746  | -2,110548 | 0,377709072 | 0,004330359 | 0,330435232 |
| UBE2E1-AS1   | 30,518553   | 3,030628  | 0,561304591 | 0,004374402 | 0,330435232 |
| FOXI3        | 405,501943  | -2,235103 | 0,408071728 | 0,004462465 | 0,334590736 |
| FAM21EP      | 28,952462   | 2,440531  | 0,454598738 | 0,004633063 | 0,344475022 |
| GNG11        | 177,289717  | 2,388944  | 0,444408438 | 0,004697628 | 0,347820231 |
| LOC151760    | 37,555359   | 4,055385  | 0,717594844 | 0,004881754 | 0,359953422 |
| EBF4         | 926,500813  | -2,105279 | 0,382956348 | 0,005039054 | 0,366983561 |
| CLTRN        | 91,214118   | -2,208317 | 0,408660804 | 0,005160954 | 0,374310337 |
| HLA-DMA      | 129,970696  | 2,791911  | 0,530479769 | 0,005233657 | 0,376526647 |
| DUSP8        | 1009,106859 | -2,124815 | 0,391010065 | 0,005421802 | 0,382323077 |
| AMER2        | 85,303773   | -4,903363 | 0,827422472 | 0,00556807  | 0,386300756 |
| NEXMIF       | 152,020623  | -2,379328 | 0,451180425 | 0,005575786 | 0,386300756 |
| LOC105372793 | 60,164013   | -2,645564 | 0,505870059 | 0,005527368 | 0,386300756 |
| ARMC3        | 44,004830   | 3,301865  | 0,623115799 | 0,005682036 | 0,391355711 |
| H1-2         | 1253,717094 | 4,372085  | 0,778833812 | 0,006281695 | 0,402363213 |
| NGF          | 28,998625   | -5,312023 | 0,878278419 | 0,006085037 | 0,402363213 |
| H2AC13       | 57,802894   | 2,912808  | 0,564885206 | 0,006324124 | 0,402363213 |
| SUSD2        | 48,559757   | 2,332326  | 0,44645699  | 0,006207968 | 0,402363213 |
| ZNF860       | 30,609216   | 3,327763  | 0,636034472 | 0,006388669 | 0,402363213 |
| SOX21-AS1    | 454,193051  | -2,288834 | 0,43839043  | 0,006430195 | 0,402363213 |
| STAB1        | 28,840577   | 4,147057  | 0,755452179 | 0,006600202 | 0,405872299 |

|              |             |            |             |             |             |
|--------------|-------------|------------|-------------|-------------|-------------|
| MARVELD3     | 125,416640  | -2,042442  | 0,378984335 | 0,006556484 | 0,405872299 |
| FOXCUT       | 173,477735  | 2,678922   | 0,524240057 | 0,006691182 | 0,410007933 |
| ZNF460       | 293,617721  | -2,224608  | 0,427585615 | 0,006979412 | 0,411478038 |
| A2M-AS1      | 60,090907   | 2,706839   | 0,531927131 | 0,00691806  | 0,411478038 |
| LOC105375740 | 86,770649   | -2,370976  | 0,46056627  | 0,006846118 | 0,411478038 |
| NQO1         | 351,818692  | 2,235962   | 0,430797178 | 0,007043902 | 0,412818205 |
| TCN2         | 85,481631   | 3,841755   | 0,720806098 | 0,007062551 | 0,412818205 |
| H2AJ         | 362,220293  | 2,430186   | 0,476221574 | 0,007143814 | 0,412818205 |
| LOC107985805 | 69,525191   | 2,079098   | 0,393589469 | 0,007298886 | 0,413061172 |
| PAX2         | 233,687579  | -2,136228  | 0,40852503  | 0,00735046  | 0,41334709  |
| ASNSP1       | 344,657840  | -3,151973  | 0,617752823 | 0,007338129 | 0,41334709  |
| TAPT1-AS1    | 123,498240  | -2,096041  | 0,39921997  | 0,00748669  | 0,418864575 |
| CXCR4        | 665,122921  | -2,221408  | 0,431640906 | 0,007637986 | 0,421512451 |
| HMOX1        | 1093,831527 | 2,024364   | 0,382354463 | 0,007789452 | 0,426123586 |
| SULF1        | 1407,221782 | -2,493240  | 0,495333451 | 0,007793714 | 0,426123586 |
| FAM78B       | 54,049146   | -2,562930  | 0,511916417 | 0,007992772 | 0,430292346 |
| LINC01597    | 37,243723   | -2,502565  | 0,499487631 | 0,008060368 | 0,430292346 |
| EXOSC10-AS1  | 39,898137   | 2,091504   | 0,401575181 | 0,008027439 | 0,430292346 |
| SNHG32       | 4816,524514 | -2,008954  | 0,38031661  | 0,008136959 | 0,432915455 |
| H2AC11       | 72,462803   | 2,602216   | 0,522608452 | 0,008288056 | 0,435951051 |
| UBL4B        | 8,989938    | -6,065390  | 0,984368804 | 0,008244327 | 0,435951051 |
| MASP1        | 21,080358   | -4,784451  | 0,85785675  | 0,008474581 | 0,441072181 |
| SETBP1       | 104,230686  | -4,504099  | 0,827547562 | 0,008697979 | 0,442373736 |
| DENND1C      | 166,681322  | 2,236305   | 0,442279609 | 0,00865723  | 0,442373736 |
| ABCC6P2      | 58,605638   | 2,124452   | 0,414419093 | 0,00871163  | 0,442373736 |
| LOC105375519 | 123,303250  | 2,201741   | 0,43332124  | 0,008596054 | 0,442373736 |
| SPINK5       | 56,960169   | 3,380029   | 0,671658903 | 0,00889759  | 0,446638892 |
| DNAH17       | 660,196411  | -12,991896 | 1,415355257 | 0,008952578 | 0,44813329  |
| GNG4         | 2828,753979 | -2,154744  | 0,424255402 | 0,009041138 | 0,450555045 |
| CCDC116      | 50,743509   | 2,828669   | 0,574753817 | 0,009053493 | 0,450555045 |
| ABCF2-H2BE1  | 79,017769   | -3,696435  | 0,723836331 | 0,009167405 | 0,452063237 |
| SH2D3C       | 173,250310  | -3,670695  | 0,722574101 | 0,009422087 | 0,452514835 |
| SOX21        | 192,512570  | -2,283514  | 0,457850407 | 0,009272394 | 0,452514835 |
| TMED10P2     | 13,875128   | -4,819407  | 0,871634639 | 0,009241487 | 0,452514835 |
| SHC2         | 684,471429  | -2,390509  | 0,485047011 | 0,009537637 | 0,453549176 |
| RFTN2        | 82,707924   | 2,864247   | 0,588418628 | 0,009878295 | 0,461769397 |
| LOC105379504 | 41,293086   | -2,451935  | 0,501916547 | 0,009938537 | 0,461769397 |
| IFIT3        | 43,831074   | 2,507580   | 0,51614904  | 0,010181648 | 0,462265878 |
| KCNA2        | 82,223961   | -2,978108  | 0,611573092 | 0,010043193 | 0,462265878 |
| PTPN6        | 78,379271   | 2,699979   | 0,557503478 | 0,010161193 | 0,462265878 |
| LDHD         | 129,209991  | 2,010303   | 0,391882921 | 0,010149346 | 0,462265878 |
| LOC101927372 | 254,006279  | -2,567526  | 0,528534871 | 0,010056872 | 0,462265878 |
| LOC114841040 | 32,439531   | 2,586396   | 0,533564783 | 0,010187365 | 0,462265878 |
| DAB1         | 90,481342   | -3,717556  | 0,738909645 | 0,010355817 | 0,46706311  |
| LOC644285    | 414,486063  | -2,280702  | 0,463925576 | 0,010349105 | 0,46706311  |

|              |             |           |             |             |             |
|--------------|-------------|-----------|-------------|-------------|-------------|
| LOC105374334 | 32,195839   | 4,638824  | 0,863822353 | 0,010384734 | 0,467181598 |
| ALOX5        | 68,900380   | -2,642849 | 0,54872954  | 0,010613777 | 0,473270214 |
| LOC105376483 | 15,592257   | 3,677065  | 0,735519121 | 0,010647714 | 0,473270214 |
| SLCO3A1      | 50,987492   | -2,509594 | 0,520864958 | 0,010816953 | 0,474027365 |
| KRT222       | 194,081512  | 2,808758  | 0,585660287 | 0,010958442 | 0,47441647  |
| PDE1A        | 76,600583   | 2,668715  | 0,559252946 | 0,011334662 | 0,475644889 |
| WNT4         | 40,266779   | -3,593715 | 0,731933331 | 0,011689823 | 0,475644889 |
| ERAP2        | 220,731598  | 2,214322  | 0,454493509 | 0,011622886 | 0,475644889 |
| H3C14        | 19,132920   | 3,126135  | 0,649555568 | 0,011356085 | 0,475644889 |
| SCARA5       | 71,406056   | -4,983017 | 0,918286074 | 0,011629218 | 0,475644889 |
| LOC100420528 | 20,732670   | 2,665940  | 0,557335307 | 0,011141539 | 0,475644889 |
| MYOF         | 98,844708   | 2,405213  | 0,503064848 | 0,011839179 | 0,477389443 |
| PTHLH        | 67,818047   | -2,799376 | 0,591552441 | 0,012055277 | 0,482482583 |
| SAMD9        | 284,810135  | 2,572262  | 0,544851383 | 0,012360968 | 0,486358865 |
| LOC107986617 | 17,359839   | 3,855924  | 0,77857966  | 0,012391103 | 0,486358865 |
| LOC107987250 | 48,694225   | 2,309197  | 0,482601656 | 0,012355056 | 0,486358865 |
| CALCRL       | 179,524358  | 2,819903  | 0,599296854 | 0,012572062 | 0,487190171 |
| H3C15        | 18,019846   | 3,213396  | 0,674335694 | 0,012510092 | 0,487190171 |
| LPP-AS2      | 27,195223   | 2,953635  | 0,626554803 | 0,01263898  | 0,487190171 |
| FOSL2        | 498,345889  | -2,160202 | 0,449119202 | 0,013357203 | 0,491346421 |
| GPRI1        | 43,831085   | 2,068560  | 0,424244067 | 0,013445204 | 0,491346421 |
| ONECUT1      | 80,375529   | -2,513206 | 0,53652296  | 0,013210403 | 0,491346421 |
| LOC105378808 | 60,735803   | -2,405349 | 0,511242528 | 0,013256575 | 0,491346421 |
| LOC105370363 | 22,128300   | 2,915329  | 0,625509733 | 0,013593049 | 0,49295607  |
| GALR2        | 18,776678   | 2,690987  | 0,582278692 | 0,014180182 | 0,505122879 |
| MGC16275     | 19,913205   | 2,699908  | 0,584681385 | 0,014255746 | 0,505122879 |
| PURPL        | 905,326998  | -2,178588 | 0,458829099 | 0,014349526 | 0,505122879 |
| PCAT7        | 44,179737   | 2,529582  | 0,547027132 | 0,014381473 | 0,505122879 |
| LOC107986673 | 32,149159   | -2,555470 | 0,55349272  | 0,014463524 | 0,505122879 |
| BHLHE40      | 3211,357365 | -2,035148 | 0,420187279 | 0,01469918  | 0,507367599 |
| ZNNT1        | 193,418348  | -2,055119 | 0,426198756 | 0,014754478 | 0,507367599 |
| ABCC2        | 147,085656  | -2,064318 | 0,429579076 | 0,014926274 | 0,5081224   |
| MID1         | 8398,040743 | 2,442604  | 0,530037031 | 0,015065038 | 0,509915674 |
| SCN3B        | 251,318239  | -3,127228 | 0,678378073 | 0,015319743 | 0,513718244 |
| LOC105376504 | 61,762559   | -3,448586 | 0,737366292 | 0,015429375 | 0,515375921 |
| MAGEB2       | 150,733781  | 5,985202  | 1,066853118 | 0,015535903 | 0,517960597 |
| SAMD11       | 3551,242289 | 2,512037  | 0,550171652 | 0,015720042 | 0,520195799 |
| LMCD1        | 280,590523  | -2,331061 | 0,50615077  | 0,015852283 | 0,522625367 |
| LOC101928092 | 140,132142  | -2,301133 | 0,501431022 | 0,016492685 | 0,528692213 |
| LOC101927441 | 20,980243   | 2,953978  | 0,652620361 | 0,016645856 | 0,530308548 |
| LOC105371870 | 96,721458   | -2,043582 | 0,430801613 | 0,016690937 | 0,530308548 |
| H3C6         | 480,760988  | 2,091117  | 0,445043835 | 0,016784642 | 0,530717248 |
| PHYH         | 1351,003601 | 2,079548  | 0,442799167 | 0,017058774 | 0,531333198 |
| VAMP8        | 885,013422  | 2,171423  | 0,468580666 | 0,016972804 | 0,531333198 |
| ZNF528       | 51,419408   | -2,789087 | 0,620849434 | 0,017149    | 0,531333198 |

|                   |            |           |             |             |             |
|-------------------|------------|-----------|-------------|-------------|-------------|
| LOC105379392      | 30,522192  | 2,168717  | 0,468142051 | 0,017047111 | 0,531333198 |
| H4C15             | 848,081978 | 2,326789  | 0,513961658 | 0,017764578 | 0,543333142 |
| ZSCAN18           | 496,028424 | -2,477565 | 0,553161678 | 0,01796893  | 0,544894016 |
| BST1              | 42,447076  | -2,733265 | 0,613235969 | 0,018004493 | 0,545042312 |
| H2BC5             | 325,329786 | 2,052075  | 0,43867119  | 0,018071646 | 0,546144805 |
| EXTL1             | 39,272401  | 2,955607  | 0,662931628 | 0,01835417  | 0,550006069 |
| FANCF             | 24,796607  | 3,274535  | 0,726371963 | 0,01847581  | 0,55028118  |
| LOC105375010      | 29,577349  | -2,326060 | 0,51692616  | 0,018471957 | 0,55028118  |
| HCN4              | 200,515863 | -2,341954 | 0,52183483  | 0,018638418 | 0,551089327 |
| MIR1915HG         | 622,393508 | 2,143832  | 0,467832047 | 0,018688765 | 0,551660042 |
| SHBG              | 16,336178  | 2,600599  | 0,586773003 | 0,018779639 | 0,552506929 |
| LOC105374493      | 34,884114  | -2,082786 | 0,450736212 | 0,018853601 | 0,552852287 |
| SMIM2-AS1         | 39,907480  | 2,069649  | 0,447096195 | 0,018919456 | 0,553627805 |
| LOC112268241      | 16,162227  | 2,576821  | 0,58192947  | 0,018942358 | 0,553627805 |
| PTPRO             | 109,503379 | -3,192074 | 0,717533457 | 0,019612448 | 0,564851214 |
| GABRQ             | 117,505298 | -3,325180 | 0,743274717 | 0,019692484 | 0,565850958 |
| ST6GALNAC5        | 58,661560  | -2,277628 | 0,509295209 | 0,019715577 | 0,565850958 |
| AGGFIP1           | 75,236533  | -2,001329 | 0,429735175 | 0,019846073 | 0,566829963 |
| BTBD19            | 19,815384  | -2,256164 | 0,505427563 | 0,020204302 | 0,569046054 |
| TOP1P1            | 20,975574  | 2,395720  | 0,545105753 | 0,020760003 | 0,576763449 |
| LBH               | 348,392939 | -2,007632 | 0,436482617 | 0,021243329 | 0,580922357 |
| JMJD1C-AS1        | 20,547817  | 2,177953  | 0,486735487 | 0,021046359 | 0,580922357 |
| CRHR1             | 74,163037  | -3,119579 | 0,714829279 | 0,021667636 | 0,587838014 |
| ALDH3A1           | 51,564457  | 2,030258  | 0,445706127 | 0,021892099 | 0,589428174 |
| TOGARAM2          | 64,410262  | 2,032265  | 0,446168429 | 0,021844844 | 0,589428174 |
| LY6G6F-<br>LY6G6D | 30,422044  | 2,837476  | 0,656716005 | 0,021957089 | 0,589475932 |
| ISM1              | 168,213279 | 2,253060  | 0,514240247 | 0,022674901 | 0,596937774 |
| HLA-DRB5          | 66,684569  | 2,095448  | 0,474913907 | 0,024622952 | 0,6124707   |
| PLXNC1            | 125,599244 | -2,032641 | 0,455195742 | 0,024565674 | 0,6124707   |
| OLFM1             | 87,194852  | -2,502325 | 0,588324214 | 0,024498682 | 0,6124707   |
| ZMAT1             | 154,767848 | -2,057124 | 0,460991629 | 0,023984921 | 0,6124707   |
| COL23A1           | 161,782803 | -2,293905 | 0,533073397 | 0,024641254 | 0,6124707   |
| GRIN3B            | 75,913529  | -2,122059 | 0,480329354 | 0,023831561 | 0,6124707   |
| TCAM1P            | 292,359082 | -2,164467 | 0,494167664 | 0,024176086 | 0,6124707   |
| SNORA11F          | 26,338611  | 2,425985  | 0,565904865 | 0,023862346 | 0,6124707   |
| LINC02154         | 46,614149  | -4,990886 | 1,026013531 | 0,023790692 | 0,6124707   |
| PVALB             | 47,946661  | 2,151926  | 0,493283792 | 0,025002553 | 0,613180123 |
| LAMB2P1           | 81,418210  | -2,224735 | 0,515092519 | 0,025112833 | 0,613180123 |
| PLPP4             | 83,437231  | -2,586149 | 0,6118097   | 0,02505361  | 0,613180123 |
| HAPLN2            | 66,310597  | -2,150832 | 0,493860281 | 0,025269234 | 0,613519736 |
| ZNF136            | 547,872865 | -2,288885 | 0,537473715 | 0,026235772 | 0,618327315 |
| DLEC1             | 69,802038  | -2,346366 | 0,557397501 | 0,027282522 | 0,618327315 |
| ZNF681            | 67,945174  | -3,170104 | 0,753168711 | 0,027102651 | 0,618327315 |
| SOX1-OT           | 27,428964  | -2,472606 | 0,588381895 | 0,026438999 | 0,618327315 |
| LOC107987248      | 27,404747  | -2,656373 | 0,638453499 | 0,027271334 | 0,618327315 |

|                     |             |           |             |             |             |
|---------------------|-------------|-----------|-------------|-------------|-------------|
| LOC107987251        | 24,939658   | -2,492595 | 0,591782975 | 0,025975741 | 0,618327315 |
| LEF1-AS1            | 10,382565   | 2,965153  | 0,712581027 | 0,027764282 | 0,62136913  |
| DST-AS1             | 18,634134   | 2,385808  | 0,570050732 | 0,027761299 | 0,62136913  |
| LOC105369250        | 54,782954   | -2,358759 | 0,563292125 | 0,027960272 | 0,624188491 |
| INSM2               | 11,886420   | -4,562444 | 0,998014051 | 0,028223603 | 0,626134106 |
| CHST8               | 147,860459  | -2,191799 | 0,516440039 | 0,028368458 | 0,62747547  |
| LOC102724378        | 107,836594  | 2,044709  | 0,471499984 | 0,028630399 | 0,631967839 |
| CILP2               | 1056,471899 | 2,191085  | 0,51891651  | 0,029199336 | 0,638129205 |
| LOC105376328        | 35,957406   | 3,257089  | 0,781766807 | 0,029320919 | 0,638129205 |
| BST2                | 129,190668  | -2,603304 | 0,637831445 | 0,030455147 | 0,638242279 |
| HRH1                | 31,364331   | -3,547574 | 0,839254605 | 0,029500518 | 0,638242279 |
| IGF2                | 298,928826  | -2,190637 | 0,523733752 | 0,030760052 | 0,638242279 |
| SPOCK1              | 74,099071   | -2,533698 | 0,620688448 | 0,030703218 | 0,638242279 |
| HRK                 | 1442,061989 | -2,067082 | 0,482684959 | 0,029980322 | 0,638242279 |
| CEACAM19            | 421,866469  | -2,111206 | 0,496631935 | 0,029949543 | 0,638242279 |
| AGAP11              | 226,224745  | -4,149321 | 0,945037251 | 0,029835361 | 0,638242279 |
| LOC100132813        | 26,858145   | 3,591384  | 0,848840792 | 0,029779515 | 0,638242279 |
| TGM2                | 102,982558  | 2,036974  | 0,476814833 | 0,031344216 | 0,641216622 |
| GRM4                | 33,914389   | -2,166065 | 0,518157665 | 0,031397154 | 0,641295886 |
| IL6R                | 455,226024  | -2,414722 | 0,597222214 | 0,033202873 | 0,657379503 |
| STUM                | 712,383401  | -2,019302 | 0,475845422 | 0,033118578 | 0,657379503 |
| KRT8                | 1692,119095 | -3,237575 | 0,803462327 | 0,034900367 | 0,659904218 |
| PDE1B               | 121,592956  | -2,420183 | 0,614313225 | 0,037923755 | 0,659904218 |
| TF                  | 53,626629   | -2,140486 | 0,526316224 | 0,036971291 | 0,659904218 |
| TNXB                | 126,148950  | -2,777447 | 0,700142904 | 0,03529643  | 0,659904218 |
| H2AC17              | 44,397996   | 2,123504  | 0,514353935 | 0,034664515 | 0,659904218 |
| H3C2                | 37,279100   | 2,441449  | 0,611098822 | 0,035095964 | 0,659904218 |
| H4C14               | 171,407851  | 2,145295  | 0,529799692 | 0,037665465 | 0,659904218 |
| RBMXL2              | 7,056080    | -4,092136 | 0,970121257 | 0,036129778 | 0,659904218 |
| TBX21               | 23,823518   | -3,535255 | 0,87011824  | 0,036281811 | 0,659904218 |
| MXRA8               | 742,309992  | 4,938746  | 1,100322983 | 0,036254433 | 0,659904218 |
| FBXO43              | 27,910448   | 2,324499  | 0,586318879 | 0,037937867 | 0,659904218 |
| NKX1-2              | 328,033589  | -2,063241 | 0,498482414 | 0,03606565  | 0,659904218 |
| LOC101929174        | 40,160169   | -2,477070 | 0,620696243 | 0,03500213  | 0,659904218 |
| LOC105370910        | 97,580591   | -2,037697 | 0,492260299 | 0,03696304  | 0,659904218 |
| CCDC153             | 45,688284   | 2,117462  | 0,521734304 | 0,038033238 | 0,660655556 |
| GFAP                | 56,207540   | 2,525608  | 0,645819608 | 0,038483651 | 0,665228083 |
| TXLNB               | 67,542515   | 2,138848  | 0,532055281 | 0,039255018 | 0,672672778 |
| SUGT1P4-<br>STRA6LP | 90,262837   | 2,070079  | 0,509493046 | 0,039374107 | 0,672767195 |
| ADCYAP1R1           | 465,193709  | -2,198484 | 0,551971334 | 0,039494182 | 0,674170625 |
| LOC105371532        | 14,132693   | 2,467460  | 0,634079108 | 0,039879884 | 0,676255363 |
| LOC729557           | 9,871495    | -3,513475 | 0,883260477 | 0,040120401 | 0,676413214 |
| SCARNA17            | 28,820570   | -2,044434 | 0,503553726 | 0,040477633 | 0,676756734 |
| MYRIP               | 88,728956   | -3,270970 | 0,835919301 | 0,040823763 | 0,677578065 |
| LOC100128164        | 19,536298   | 2,490301  | 0,644092608 | 0,040985032 | 0,677578065 |

|              |            |           |             |             |             |
|--------------|------------|-----------|-------------|-------------|-------------|
| LOC107985770 | 68,489353  | 2,396833  | 0,617532415 | 0,041130972 | 0,677578065 |
| PTGER2       | 85,787112  | 2,029074  | 0,504340009 | 0,042962561 | 0,679242342 |
| SORCS2       | 32,286955  | -2,270660 | 0,580786738 | 0,04164157  | 0,679242342 |
| DLGAP3       | 87,714925  | -2,189738 | 0,557256084 | 0,042442684 | 0,679242342 |
| NOD2         | 29,843526  | -2,656171 | 0,696051762 | 0,042890477 | 0,679242342 |
| LRRTM4       | 150,016199 | 2,702259  | 0,707208258 | 0,042567824 | 0,679242342 |
| SYT9         | 129,882797 | -2,769766 | 0,722887965 | 0,042033928 | 0,679242342 |
| TCTE1        | 51,052442  | -2,897185 | 0,755715189 | 0,042282642 | 0,679242342 |
| LINC01402    | 10,805989  | -3,217822 | 0,829104117 | 0,041989727 | 0,679242342 |
| LOC105371017 | 36,450784  | -2,459946 | 0,637256278 | 0,041565889 | 0,679242342 |
| LOC105378833 | 20,204920  | -2,245461 | 0,576124057 | 0,042803151 | 0,679242342 |
| KCNMA1       | 74,965729  | -2,250091 | 0,579673145 | 0,043554829 | 0,679530352 |
| NTRK2        | 141,708054 | -2,044637 | 0,510582031 | 0,04328823  | 0,679530352 |
| PAX5         | 19,568319  | -2,734964 | 0,717831779 | 0,043166855 | 0,679530352 |
| LOC112268295 | 24,415084  | -2,997949 | 0,783904476 | 0,043318754 | 0,679530352 |
| IL11         | 44,702869  | -2,752191 | 0,725039729 | 0,043958762 | 0,67984961  |
| MRO          | 15,883299  | 2,329972  | 0,605762425 | 0,043956368 | 0,67984961  |
| STAC2        | 260,470414 | 2,553762  | 0,6713543   | 0,043928815 | 0,67984961  |
| MSANTD1      | 33,984032  | -2,022199 | 0,50443212  | 0,044009807 | 0,680047188 |
| THBS4        | 76,990769  | -2,139081 | 0,545757687 | 0,044427726 | 0,681228534 |
| SUGT1P3      | 19,701491  | -2,308214 | 0,601111382 | 0,044688301 | 0,681311766 |
| TMEM178A     | 54,875002  | -2,018488 | 0,505256216 | 0,04491301  | 0,681468869 |
| PHOSPHO1     | 96,998389  | 2,060482  | 0,520749767 | 0,045193765 | 0,682184047 |
| LOC107986246 | 15,956279  | -2,135533 | 0,546524024 | 0,045195192 | 0,682184047 |
| SMIM38       | 89,398948  | -4,752361 | 1,12486107  | 0,045603814 | 0,682746789 |
| PEG10        | 51,475601  | 2,171752  | 0,560292324 | 0,045833778 | 0,683667226 |
| C8orf34-AS1  | 36,077362  | -2,149353 | 0,55358984  | 0,046143368 | 0,683667226 |
| LOC105376010 | 162,695106 | -4,282941 | 1,050605227 | 0,045769033 | 0,683667226 |
| H2BC17       | 62,093953  | 2,172750  | 0,562547537 | 0,046580628 | 0,687489829 |
| TNFRSF12A    | 702,530996 | -2,201738 | 0,572560751 | 0,046736058 | 0,688639922 |
| SNORD15A     | 12,494615  | -3,166962 | 0,837004461 | 0,046926124 | 0,689367271 |
| GNAO1        | 354,579308 | -2,304205 | 0,606754546 | 0,047169963 | 0,69095057  |
| SATB2-AS1    | 24,904431  | 2,408586  | 0,640765043 | 0,047796243 | 0,69481449  |
| RPL5P30      | 13,576400  | -3,342785 | 0,880028155 | 0,04788322  | 0,69481449  |
| C15orf48     | 44,677075  | -2,657012 | 0,717744712 | 0,049505175 | 0,706024844 |
| LOC441087    | 36,410145  | -2,278663 | 0,606125248 | 0,049960668 | 0,707138674 |

| KEGG                                    | N. of SigGenes | Pvalue   | Bonferroni | FDR      | Number of SigGenes UP | Number of SigGenes DOWN |
|-----------------------------------------|----------------|----------|------------|----------|-----------------------|-------------------------|
| Systemic lupus erythematosus            | 31             | 1,23E-38 | 2,83E-36   | 2,83E-36 | 31                    | 0                       |
| Alcoholism                              | 32             | 8,62E-36 | 1,98E-33   | 9,88E-34 | 27                    | 5                       |
| Neutrophil extracellular trap formation | 26             | 2,57E-26 | 5,89E-24   | 1,96E-24 | 26                    | 0                       |



|                                              |    |          |          |          |    |    |
|----------------------------------------------|----|----------|----------|----------|----|----|
| Viral carcinogenesis                         | 15 | 2,83E-11 | 6,49E-09 | 1,62E-09 | 13 | 2  |
| <b>PI3K-Akt signaling pathway</b>            | 14 | 2,63E-07 | 6,02E-05 | 1,20E-05 | 3  | 11 |
| Neuroactive ligand-receptor interaction      | 14 | 3,96E-07 | 9,06E-05 | 1,51E-05 | 4  | 10 |
| Herpes simplex virus 1 infection             | 15 | 3,00E-06 | 6,87E-04 | 9,81E-05 | 6  | 9  |
| Toxoplasmosis                                | 8  | 5,21E-06 | 1,19E-03 | 1,49E-04 | 6  | 2  |
| Necroptosis                                  | 9  | 5,88E-06 | 1,35E-03 | 1,50E-04 | 9  | 0  |
| Intestinal immune network for IgA production | 6  | 1,17E-05 | 2,68E-03 | 2,68E-04 | 5  | 1  |
| Taste transduction                           | 7  | 1,41E-05 | 3,23E-03 | 2,93E-04 | 2  | 5  |
| Morphine addiction                           | 7  | 1,95E-05 | 4,46E-03 | 3,72E-04 | 2  | 5  |
| Pathways in cancer                           | 14 | 2,21E-05 | 5,06E-03 | 3,89E-04 | 6  | 8  |
| Viral myocarditis                            | 6  | 3,18E-05 | 7,29E-03 | 5,21E-04 | 5  | 1  |
| Inflammatory bowel disease                   | 6  | 4,70E-05 | 1,08E-02 | 7,17E-04 | 4  | 2  |
| Renin secretion                              | 6  | 6,27E-05 | 1,44E-02 | 8,97E-04 | 2  | 4  |
| <b>MAPK signaling pathway</b>                | 10 | 9,54E-05 | 2,18E-02 | 1,28E-03 | 1  | 9  |
| Leishmaniasis                                | 6  | 1,06E-04 | 2,43E-02 | 1,35E-03 | 6  | 0  |
| <b>Calcium signaling pathway</b>             | 9  | 1,60E-04 | 3,67E-02 | 1,93E-03 | 1  | 8  |
| Transcriptional misregulation in cancer      | 8  | 1,80E-04 | 4,12E-02 | 2,06E-03 | 5  | 3  |
| GABAergic synapse                            | 6  | 2,10E-04 | 4,81E-02 | 2,29E-03 | 1  | 5  |

**Appendix table S6. Differentially expressed proteins in HEK293T-ACE2 cells upon treatment with 1  $\mu$ M compound #7 for 24 h.**

Proteomic assay based on LC-MS/MS approach performed on HEK-293T-ACE2 cells treated with PI-7 molecule (1  $\mu$ M) for 24 h. In the treated cells, there were found 17 downregulated and 66 upregulated proteins. Data given include protein entry, protein names, gene names, log<sub>2</sub> fold changes (log<sub>2</sub>FC), fold change (FC), Student's *t*-test false discovery rate (FDR), number of peptides (Razor + unique peptides), and proportion of sequence coverage (Unique + razor sequence coverage).

| Entry  | Protein name                                                             | Gene name | log <sub>2</sub> FC | FC   | Student's <i>t</i> -test FDR | Razor + unique peptides | Unique + razor sequence coverage (%) |
|--------|--------------------------------------------------------------------------|-----------|---------------------|------|------------------------------|-------------------------|--------------------------------------|
| Q6FI81 | Anamorsin                                                                | CIAPIN1   | -0,92               | 0,53 | 3,71E-02                     | 4                       | 24,4                                 |
| P55145 | Mesencephalic astrocyte-derived neurotrophic factor                      | MANF      | -0,87               | 0,55 | 4,88E-02                     | 6                       | 33                                   |
| P10412 | Histone H1.4                                                             | HIST1H1E  | -0,73               | 0,60 | 5,44E-04                     | 12                      | 32,4                                 |
| P51572 | B-cell receptor-associated protein 31                                    | BCAP31    | -0,72               | 0,61 | 6,31E-03                     | 7                       | 26                                   |
| P62280 | 40S ribosomal protein S11                                                | RPS11     | -0,70               | 0,61 | 5,76E-03                     | 8                       | 41,1                                 |
| P47813 | Eukaryotic translation initiation factor 1A, X-chromosomal               | EIF1AX    | -0,70               | 0,62 | 3,17E-03                     | 6                       | 34                                   |
| P62750 | 60S ribosomal protein L23a                                               | RPL23A    | -0,62               | 0,65 | 3,54E-03                     | 9                       | 37,2                                 |
| P62979 | Ubiquitin-40S ribosomal protein S27a                                     | RPS27A    | -0,62               | 0,65 | 5,82E-05                     | 12                      | 55,8                                 |
| P84090 | Enhancer of rudimentary homolog                                          | ERH       | -0,58               | 0,67 | 1,32E-02                     | 4                       | 37,5                                 |
| P60866 | 40S ribosomal protein S20                                                | RPS20     | -0,58               | 0,67 | 2,10E-03                     | 4                       | 28,6                                 |
| P35613 | Basigin                                                                  | BSG       | -0,57               | 0,67 | 2,79E-03                     | 6                       | 22,9                                 |
| Q9H444 | Charged multivesicular body protein 4b                                   | CHMP4B    | -0,57               | 0,67 | 5,54E-04                     | 6                       | 27,7                                 |
| Q07020 | 60S ribosomal protein L18                                                | RPL18     | -0,56               | 0,68 | 9,09E-03                     | 7                       | 35,6                                 |
| P42677 | 40S ribosomal protein S27                                                | RPS27     | -0,55               | 0,68 | 2,24E-04                     | 5                       | 40,5                                 |
| P25788 | Proteasome subunit alpha type-3                                          | PSMA3     | -0,52               | 0,70 | 5,44E-04                     | 6                       | 22,4                                 |
| P13073 | Cytochrome c oxidase subunit 4 isoform 1, mitochondrial                  | COX4I1    | -0,50               | 0,71 | 7,07E-03                     | 6                       | 31,4                                 |
| Q9BRA2 | Thioredoxin domain-containing protein 17                                 | TXNDC17   | -0,50               | 0,71 | 3,68E-03                     | 4                       | 46,3                                 |
| P38159 | RNA-binding motif protein, X chromosome                                  | RBMX      | -0,50               | 0,71 | 2,35E-04                     | 10                      | 26,1                                 |
| P48643 | T-complex protein 1 subunit epsilon                                      | CCT5      | 0,50                | 1,41 | 6,28E-04                     | 28                      | 68,6                                 |
| P12532 | Creatine kinase U-type, mitochondrial                                    | CKMT1A    | 0,50                | 1,41 | 6,28E-04                     | 7                       | 35,5                                 |
| P04844 | Dolichyl-diphosphooligosaccharide--protein glycosyltransferase subunit 2 | RPN2      | 0,50                | 1,41 | 1,71E-04                     | 16                      | 39,9                                 |
| Q9Y5L0 | Transportin-3                                                            | TNPO3     | 0,50                | 1,41 | 4,25E-02                     | 6                       | 11,1                                 |
| P63208 | S-phase kinase-associated protein 1                                      | SKP1      | 0,50                | 1,41 | 7,76E-03                     | 5                       | 33,7                                 |
| P06748 | Nucleophosmin                                                            | NPM1      | 0,51                | 1,42 | 3,58E-03                     | 11                      | 36,4                                 |
| O15160 | DNA-directed RNA polymerases I and III subunit RPAC1                     | POLR1C    | 0,52                | 1,43 | 3,37E-03                     | 5                       | 21,7                                 |
| Q9Y285 | Phenylalanine--tRNA ligase alpha subunit                                 | FARSA     | 0,52                | 1,44 | 1,69E-02                     | 6                       | 19,5                                 |
| P23921 | Ribonucleoside-diphosphate reductase large subunit                       | RRM1      | 0,53                | 1,44 | 8,05E-03                     | 8                       | 19,4                                 |
| Q13126 | S-methyl-5-thioadenosine phosphorylase                                   | MTAP      | 0,55                | 1,46 | 3,11E-03                     | 8                       | 48,1                                 |
| Q9BSJ8 | Extended synaptotagmin-1                                                 | ESYT1     | 0,55                | 1,47 | 1,37E-02                     | 5                       | 6,4                                  |
| Q15435 | Protein phosphatase 1 regulatory subunit 7                               | PPP1R7    | 0,55                | 1,47 | 4,65E-03                     | 6                       | 23,9                                 |
| Q92616 | eIF-2-alpha kinase activator GCN1                                        | GCN1      | 0,55                | 1,47 | 1,74E-04                     | 35                      | 21                                   |

|        |                                                           |          |      |      |          |    |      |
|--------|-----------------------------------------------------------|----------|------|------|----------|----|------|
| P24534 | Elongation factor 1-beta                                  | EEF1B2   | 0,56 | 1,47 | 2,75E-03 | 5  | 37,3 |
| P09104 | Gamma-enolase                                             | ENO2     | 0,56 | 1,47 | 2,35E-04 | 13 | 48,6 |
| Q14257 | Reticulocalbin-2                                          | RCN2     | 0,57 | 1,49 | 6,68E-03 | 4  | 20,8 |
| P62917 | 60S ribosomal protein L8                                  | RPL8     | 0,58 | 1,50 | 9,79E-03 | 7  | 33,9 |
| Q8IY67 | Ribonucleoprotein PTB-binding 1                           | RAVER1   | 0,58 | 1,50 | 2,35E-04 | 5  | 17,3 |
| Q8IZL8 | Proline-, glutamic acid- and leucine-rich protein 1       | PELP1    | 0,59 | 1,51 | 3,75E-03 | 6  | 9,4  |
| P61011 | Signal recognition particle 54 kDa protein                | SRP54    | 0,60 | 1,51 | 2,37E-02 | 7  | 21   |
| Q9UBE0 | SUMO-activating enzyme subunit 1                          | SAE1     | 0,60 | 1,52 | 4,37E-04 | 11 | 47,1 |
| Q6P1J9 | Parafibromin                                              | CDC73    | 0,60 | 1,52 | 2,70E-02 | 4  | 9,6  |
| Q9ULC4 | Malignant T-cell-amplified sequence 1                     | MCTS1    | 0,62 | 1,54 | 3,58E-03 | 7  | 57,5 |
| P47985 | Cytochrome b-c1 complex subunit Rieske, mitochondrial     | UQCRCF1  | 0,62 | 1,54 | 3,37E-03 | 4  | 22,6 |
| Q8N3U4 | Cohesin subunit SA-2                                      | STAG2    | 0,63 | 1,55 | 1,48E-02 | 7  | 8,1  |
| P26038 | Moesin                                                    | MSN      | 0,63 | 1,55 | 5,64E-03 | 7  | 15,8 |
| P60953 | Cell division control protein 42 homolog                  | CDC42    | 0,63 | 1,55 | 7,15E-03 | 8  | 48,2 |
| Q15021 | Condensin complex subunit 1                               | NCAPD2   | 0,64 | 1,55 | 3,53E-03 | 14 | 16,2 |
| Q96P70 | Importin-9                                                | IPO9     | 0,66 | 1,58 | 1,03E-02 | 5  | 9,1  |
| P26599 | Polypyrimidine tract-binding protein 1                    | PTBP1    | 0,66 | 1,59 | 2,24E-04 | 16 | 52   |
| Q9C0B1 | Alpha-ketoglutarate-dependent dioxygenase FTO             | FTO      | 0,67 | 1,59 | 6,56E-03 | 7  | 20,4 |
| Q92896 | Golgi apparatus protein 1                                 | GLG1     | 0,69 | 1,61 | 2,52E-02 | 4  | 4,8  |
| Q96CS3 | FAS-associated factor 2                                   | FAF2     | 0,69 | 1,62 | 2,35E-04 | 4  | 16,2 |
| P61970 | Nuclear transport factor 2                                | NUTF2    | 0,70 | 1,62 | 3,58E-03 | 5  | 69,3 |
| P63010 | AP-2 complex subunit beta                                 | AP2B1    | 0,70 | 1,63 | 2,39E-04 | 10 | 20,4 |
| P04632 | Calpain small subunit 1                                   | CAPNS1   | 0,71 | 1,63 | 3,81E-02 | 5  | 31   |
| Q9Y6G9 | Cytoplasmic dynein 1 light intermediate chain 1           | DYNC1LI1 | 0,73 | 1,65 | 2,07E-03 | 5  | 18,4 |
| Q9HAV4 | Exportin-5                                                | XPO5     | 0,73 | 1,65 | 2,21E-03 | 13 | 15,9 |
| O75947 | ATP synthase subunit d, mitochondrial                     | ATP5PD   | 0,73 | 1,66 | 1,71E-03 | 8  | 64   |
| P08708 | 40S ribosomal protein S17                                 | RPS17    | 0,74 | 1,67 | 9,90E-04 | 8  | 60   |
| P20290 | Transcription factor BTF3                                 | BTF3     | 0,75 | 1,68 | 1,20E-03 | 6  | 48,1 |
| Q96AC1 | Fermitin family homolog 2                                 | FERMT2   | 0,75 | 1,68 | 1,48E-02 | 8  | 18,4 |
| Q5JTH9 | RRP12-like protein                                        | RRP12    | 0,79 | 1,72 | 4,43E-02 | 11 | 12,8 |
| Q9H0A0 | RNA cytidine acetyltransferase                            | NAT10    | 0,79 | 1,73 | 5,44E-04 | 12 | 17,2 |
| Q96T76 | MMS19 nucleotide excision repair protein homolog          | MMS19    | 0,80 | 1,75 | 5,44E-04 | 6  | 10,2 |
| P62081 | 40S ribosomal protein S7                                  | RPS7     | 0,82 | 1,76 | 2,31E-03 | 12 | 55,7 |
| O00429 | Dynamin-1-like protein                                    | DNM1L    | 0,82 | 1,77 | 1,42E-03 | 12 | 27,3 |
| P35270 | Sepiapterin reductase                                     | SPR      | 0,87 | 1,83 | 1,81E-02 | 4  | 24,5 |
| O00764 | Pyridoxal kinase                                          | PDXK     | 0,87 | 1,83 | 1,97E-02 | 4  | 21,2 |
| O15260 | Surfeit locus protein 4                                   | SURF4    | 0,88 | 1,83 | 1,82E-03 | 4  | 18,2 |
| Q9BXW7 | Haloacid dehalogenase-like hydrolase domain-containing 5  | HDHD5    | 0,92 | 1,89 | 2,99E-03 | 6  | 25,1 |
| P61086 | Ubiquitin-conjugating enzyme E2 K                         | UBE2K    | 0,92 | 1,90 | 3,36E-02 | 4  | 33   |
| P99999 | Cytochrome c                                              | CYCS     | 0,97 | 1,95 | 6,59E-04 | 4  | 41   |
| Q14978 | Nucleolar and coiled-body phosphoprotein 1                | NOLC1    | 1,01 | 2,01 | 2,14E-02 | 8  | 15,2 |
| Q99436 | Proteasome subunit beta type-7                            | PSMB7    | 1,01 | 2,02 | 7,16E-03 | 6  | 34,3 |
| Q9GZS3 | WD repeat-containing protein 61                           | WDR61    | 1,02 | 2,02 | 2,21E-03 | 4  | 26,9 |
| Q9BWD1 | Acetyl-CoA acetyltransferase, cytosolic                   | ACAT2    | 1,03 | 2,04 | 2,07E-04 | 5  | 35   |
| Q05639 | Elongation factor 1-alpha 2                               | EEF1A2   | 1,04 | 2,05 | 8,77E-04 | 8  | 38,2 |
| Q14011 | Cold-inducible RNA-binding protein                        | CIRBP    | 1,06 | 2,09 | 4,55E-04 | 4  | 32   |
| Q16836 | Hydroxyacyl-coenzyme A dehydrogenase, mitochondrial       | HADH     | 1,07 | 2,09 | 4,26E-04 | 8  | 42,4 |
| Q8N684 | Cleavage and polyadenylation specificity factor subunit 7 | CPSF7    | 1,08 | 2,11 | 2,71E-02 | 4  | 13,4 |
| Q99598 | Translin-associated protein X                             | TSNAX    | 1,11 | 2,16 | 7,56E-03 | 4  | 22,8 |
| Q15428 | Splicing factor 3A subunit 2                              | SF3A2    | 1,11 | 2,17 | 4,19E-02 | 7  | 24,4 |
| P25787 | Proteasome subunit alpha type-2                           | PSMA2    | 1,12 | 2,17 | 1,71E-04 | 7  | 45,7 |
| P07602 | Prosaposin                                                | PSAP     | 1,31 | 2,47 | 2,35E-02 | 4  | 9,2  |
| Q7L1Q6 | Basic leucine zipper and W2 domain-containing protein 1   | BZW1     | 2,10 | 4,28 | 1,76E-03 | 8  | 23,4 |



**Appendix table S7. Proteins that take part in the interaction-network, according to those downregulated by compound #7 in HEK293T-ACE2 cells.**

A protein interaction network was generated using the Search Tool for the Retrieval of Interacting Genes/ Proteins (STRING) database (<https://string-db.org>), using only those proteins that were downregulated in PI-7- treated cells. Data given include term ID, term description, observed gene count in the network, background gene count, strength, false discovery rate (FDR), and matching network proteins.

| Term ID    | Term description                                                    | Observed gene count | Background gene count | Strength | FDR      | Matching proteins in the network                                                                       |
|------------|---------------------------------------------------------------------|---------------------|-----------------------|----------|----------|--------------------------------------------------------------------------------------------------------|
| GO:0070972 | Protein localization to endoplasmic reticulum                       | 8                   | 140                   | 1.79     | 4.64e-09 | CHMP4B,RPS11,RPS27A,RPS27,RPL23A,BCAP31,RPS20,RPL18                                                    |
| GO:0045047 | Protein targeting to endoplasmic reticulum                          | 7                   | 110                   | 1.84     | 4.39e-08 | CHMP4B,RPS11,RPS27A,RPS27,RPL23A,RPS20,RPL18                                                           |
| GO:0006413 | Translational initiation                                            | 7                   | 141                   | 1.73     | 1.16e-07 | RPS11,RPS27A,RPS27,EIF1AX,RPL23A,RPS20,RPL18                                                           |
| GO:0006612 | Protein targeting to membrane                                       | 7                   | 165                   | 1.66     | 2.69e-07 | CHMP4B,RPS11,RPS27A,RPS27,RPL23A,RPS20,RPL18                                                           |
| GO:0006614 | SRP-dependent cotranslational protein targeting to membrane         | 6                   | 96                    | 1.83     | 6.50e-07 | RPS11,RPS27A,RPS27,RPL23A,RPS20,RPL18                                                                  |
| GO:0019083 | Viral transcription                                                 | 6                   | 115                   | 1.75     | 1.38e-06 | RPS11,RPS27A,RPS27,RPL23A,RPS20,RPL18                                                                  |
| GO:0000184 | Nuclear-transcribed mRNA catabolic process, nonsense-mediated decay | 6                   | 119                   | 1.74     | 1.49e-06 | RPS11,RPS27A,RPS27,RPL23A,RPS20,RPL18                                                                  |
| GO:0072657 | Protein localization to membrane                                    | 8                   | 495                   | 1.24     | 6.70e-06 | CHMP4B,RPS11,RPS27A,BSG,RPS27,RPL23A,RPS20,RPL18                                                       |
| GO:0016032 | Viral process                                                       | 9                   | 776                   | 1.1      | 8.86e-06 | PSMA3,CHMP4B,RPS11,RPS27A,RPS27,RPL23A,BCAP31,RPS20,RPL18                                              |
| GO:0044265 | Cellular macromolecule catabolic process                            | 8                   | 917                   | 0.98     | 0.00035  | PSMA3,CHMP4B,RPS11,RPS27A,RPS27,RPL23A,RPS20,RPL18                                                     |
| GO:0006886 | Intracellular protein transport                                     | 8                   | 999                   | 0.94     | 0.00062  | CHMP4B,RPS11,RPS27A,RPS27,RPL23A,BCAP31,RPS20,RPL18                                                    |
| GO:0016071 | mRNA metabolic process                                              | 7                   | 678                   | 1.05     | 0.00065  | RPS11,RPS27A,RPS27,RBMX,RPL23A,RPS20,RPL18                                                             |
| GO:0034613 | Cellular protein localization                                       | 9                   | 1610                  | 0.78     | 0.0016   | CHMP4B,RPS11,RPS27A,BSG,RPS27,RPL23A,BCAP31,RPS20,RPL18                                                |
| GO:0044271 | Cellular nitrogen compound biosynthetic process                     | 8                   | 1522                  | 0.76     | 0.0095   | RPS11,RPS27A,RPS27,RBMX,EIF1AX,RPL23A,RPS20,RPL18                                                      |
| GO:0034645 | Cellular macromolecule biosynthetic process                         | 8                   | 1592                  | 0.74     | 0.0118   | RPS11,RPS27A,RPS27,RBMX,EIF1AX,RPL23A,RPS20,RPL18                                                      |
| GO:0008152 | Metabolic process                                                   | 16                  | 8298                  | 0.32     | 0.0167   | PSMA3,CHMP4B,TXNDC17,RPS11,RPS27A,HIST1H1E,BSG,RPS27,RBMX,EIF1AX,CIAPIN1,RPL23A,RPS20,RPL18,ERH,COX4I1 |
| GO:0034622 | Cellular protein-containing complex assembly                        | 6                   | 816                   | 0.9      | 0.0173   | CHMP4B,RPS27A,HIST1H1E,RPS27,RBMX,RPL23A                                                               |
| GO:0051641 | Cellular localization                                               | 10                  | 2967                  | 0.56     | 0.0220   | CHMP4B,RPS11,RPS27A,BSG,RPS27,RPL23A,BCAP31,RPS20,MANF,RPL18                                           |
| GO:0051649 | Establishment of localization in cell                               | 9                   | 2375                  | 0.61     | 0.0247   | CHMP4B,RPS11,RPS27A,RPS27,RPL23A,BCAP31,RPS20,MANF,RPL18                                               |
| GO:0044237 | Cellular metabolic process                                          | 15                  | 7513                  | 0.34     | 0.0294   | PSMA3,CHMP4B,RPS11,RPS27A,HIST1H1E,BSG,RPS27,RBMX,EIF1AX,CIAPIN1,RPL23A,RPS20,RPL18,ERH,COX4I1         |
| GO:0010629 | Negative regulation of gene expression                              | 8                   | 2014                  | 0.64     | 0.0485   | RPS11,RPS27A,HIST1H1E,RPS27,RBMX,RPL23A,RPS20,RPL18                                                    |

**Appendix table S8. Proteins that take part in the interaction network, according to those upregulated by compound #7 in HEK293T-ACE2 cells.**

A protein interaction network was generated using STRING database (<https://string-db.org>) by using only those proteins found upregulated in PI-7-treated cells. Data given include term ID, term description, observed gene count in the network, background gene count, strength, false discovery rate (FDR), and matching network proteins.

| Term ID    | Term description                                  | Observed gene count | Background gene count | Strength | FDR      | Matching proteins in the network                                                                                                                                                                                                                                                         |
|------------|---------------------------------------------------|---------------------|-----------------------|----------|----------|------------------------------------------------------------------------------------------------------------------------------------------------------------------------------------------------------------------------------------------------------------------------------------------|
| GO:0034641 | Cellular nitrogen compound metabolic process      | 32                  | 3282                  | 0.46     | 3.69e-05 | EEF1A2,SF3A2,SPR,NAT10,RPL8,XPO5,WDR61,PDXK,RAVER1,NPM1,GCN1L1,RRM1,PELP1,ATP5H,FARSA,RPS7,CPSF7,RPS17,PTBP1,TSNAX,CDC73,MCTS1,POLR1C,MTAP,BTF3,EEF1B2,PSAP,NOLC1,MMS19,FTO,ENO2,RRP12                                                                                                   |
| GO:0010608 | Posttranscriptional regulation of gene expression | 14                  | 574                   | 0.86     | 4.75e-05 | EEF1A2,PSMA2,NAT10,PSMB7,XPO5,NPM1,GCN1L1,PTBP1,TSNAX,MCTS1,EEF1B2,NOLC1,FTO,CIRBP                                                                                                                                                                                                       |
| GO:0044237 | Cellular metabolic process                        | 48                  | 7513                  | 0.28     | 7.28e-05 | EEF1A2,SF3A2,PSMA2,SKP1,SPR,RPN2,NAT10,PSMB7,UBE2K,FAF2,RPL8,XPO5,ESYT1,WDR61,SAE1,PDXK,RAVER1,NPM1,GCN1L1,RRM1,PELP1,ATP5H,UQCFS1,CYCS,FARSA,CECR5,RPS7,CPSF7,RPS17,PTBP1,TSNAX,ACAT2,CDC73,MCTS1,POLR1C,MTAP,BTF3,EEF1B2,PSAP,CDC42,NOLC1,CKMT1A,MMS19,FTO,ENO2,RRP12,HADH,AP2B1       |
| GO:0006807 | Nitrogen compound metabolic process               | 45                  | 6852                  | 0.29     | 0.00015  | EEF1A2,SF3A2,PSMA2,SKP1,SPR,RPN2,CAPN1,NAT10,PSMB7,UBE2K,FAF2,RPL8,XPO5,ESYT1,WDR61,SAE1,PDXK,RAVER1,NPM1,GCN1L1,RRM1,PELP1,ATP5H,CYCS,FARSA,RPS7,CPSF7,RPS17,PTBP1,TSNAX,CDC73,MCTS1,POLR1C,MTAP,BTF3,EEF1B2,PSAP,CDC42,NOLC1,CKMT1A,MMS19,FTO,ENO2,RRP12,AP2B1                         |
| GO:0071704 | Organic substance metabolic process               | 48                  | 7755                  | 0.26     | 0.00015  | EEF1A2,SF3A2,PSMA2,SKP1,SPR,RPN2,CAPN1,NAT10,PSMB7,UBE2K,FAF2,RPL8,XPO5,ESYT1,WDR61,SAE1,PDXK,RAVER1,NPM1,GCN1L1,RRM1,PELP1,ATP5H,CYCS,FARSA,CECR5,RPS7,CPSF7,RPS17,PTBP1,TSNAX,ACAT2,CDC73,MCTS1,POLR1C,MTAP,BTF3,EEF1B2,PSAP,CDC42,NOLC1,CKMT1A,MMS19,FTO,ENO2,RRP12,HADH,AP2B1        |
| GO:0010467 | Gene expression                                   | 23                  | 2056                  | 0.52     | 0.00027  | EEF1A2,SF3A2,NAT10,RPL8,WDR61,RAVER1,GCN1L1,PELP1,FARSA,RPS7,CPSF7,RPS17,PTBP1,TSNAX,CDC73,MCTS1,POLR1C,BTF3,EEF1B2,PSAP,NOLC1,MMS19,RRP12                                                                                                                                               |
| GO:0006725 | Cellular aromatic compound metabolic process      | 27                  | 2882                  | 0.44     | 0.00030  | SF3A2,SPR,NAT10,RPL8,XPO5,WDR61,PDXK,RAVER1,NPM1,RRM1,PELP1,ATP5H,FARSA,RPS7,CPSF7,RPS17,PTBP1,TSNAX,CDC73,POLR1C,MTAP,BTF3,NOLC1,MMS19,FTO,ENO2,RRP12                                                                                                                                   |
| GO:0008152 | Metabolic process                                 | 49                  | 8298                  | 0.24     | 0.00030  | EEF1A2,SF3A2,PSMA2,SKP1,SPR,RPN2,CAPN1,NAT10,PSMB7,UBE2K,FAF2,RPL8,XPO5,ESYT1,WDR61,SAE1,PDXK,RAVER1,NPM1,GCN1L1,RRM1,PELP1,ATP5H,UQCFS1,CYCS,FARSA,CECR5,RPS7,CPSF7,RPS17,PTBP1,TSNAX,ACAT2,CDC73,MCTS1,POLR1C,MTAP,BTF3,EEF1B2,PSAP,CDC42,NOLC1,CKMT1A,MMS19,FTO,ENO2,RRP12,HADH,AP2B1 |
| GO:0016070 | RNA metabolic process                             | 20                  | 1584                  | 0.57     | 0.00030  | SF3A2,NAT10,RPL8,XPO5,WDR61,RAVER1,PELP1,FARSA,RPS7,CPSF7,RPS17,PTBP1,TSNAX,CDC73,POLR1C,BTF3,NOLC1,MMS19,FTO,RRP12                                                                                                                                                                      |
| GO:0022613 | Ribonucleoprotein complex biogenesis              | 11                  | 423                   | 0.89     | 0.00030  | SF3A2,NAT10,NPM1,PELP1,RPS7,CPSF7,RPS17,CDC73,MCTS1,NOLC1,RRP12                                                                                                                                                                                                                          |
| GO:0046483 | Heterocycle metabolic process                     | 27                  | 2840                  | 0.45     | 0.00030  | SF3A2,SPR,NAT10,RPL8,XPO5,WDR61,PDXK,RAVER1,NPM1,RRM1,PELP1,ATP5H,FARSA,R                                                                                                                                                                                                                |

|            |                                                  |    |       |      |         |                                                                                                                                                                                                                                                                                                                                                                              |
|------------|--------------------------------------------------|----|-------|------|---------|------------------------------------------------------------------------------------------------------------------------------------------------------------------------------------------------------------------------------------------------------------------------------------------------------------------------------------------------------------------------------|
|            |                                                  |    |       |      |         | PS7,CPSF7,RPS17,PTBP1,TSNAX,CDC73,POLR1C,MTAP,BTF3,NOLC1,MMS19,FTO,ENO2,RRP12                                                                                                                                                                                                                                                                                                |
| GO:1901360 | Organic cyclic compound metabolic process        | 28 | 3118  | 0.43 | 0.00033 | SF3A2,SPR,NAT10,RPL8,XPO5,WDR61,PDXK,RAVER1,NPM1,RRM1,PELP1,ATP5H,FARSA,RPS7,CPSF7,RPS17,PTBP1,TSNAX,ACAT2,CDC73,POLR1C,MTAP,BTF3,NOLC1,MMS19,FTO,ENO2,RRP12                                                                                                                                                                                                                 |
| GO:0044238 | Primary metabolic process                        | 45 | 7332  | 0.26 | 0.00043 | EEF1A2,SF3A2,PSMA2,SKP1,RPN2,CAPNS1,NAT10,PSMB7,UBE2K,FAF2,RPL8,XPO5,ESYT1,WDR61,SAE1,RAVER1,NPM1,GCN1L1,RRM1,PELP1,ATP5H,CYCS,FARSA,CECR5,RPS7,CPSF7,RPS17,PTBP1,TSNAX,ACAT2,CDC73,MCTS1,POLR1C,MTAP,BTF3,EEF1B2,PSAP,CDC42,NOLC1,MMS19,FTO,ENO2,RRP12,HADH,AP2B1                                                                                                           |
| GO:0044271 | Cellular nitrogen compound biosynthetic process  | 19 | 1522  | 0.57 | 0.00043 | EEF1A2,SPR,RPL8,WDR61,PDXK,GCN1L1,RRM1,ATP5H,FARSA,RPS7,CPSF7,RPS17,CDC73,MCTS1,POLR1C,MTAP,BTF3,EEF1B2,MMS19                                                                                                                                                                                                                                                                |
| GO:0006139 | Nucleobase-containing compound metabolic process | 25 | 2659  | 0.45 | 0.00068 | SF3A2,NAT10,RPL8,XPO5,WDR61,RAVER1,NPM1,RRM1,PELP1,ATP5H,FARSA,RPS7,CPSF7,RPS17,PTBP1,TSNAX,CDC73,POLR1C,MTAP,BTF3,NOLC1,MMS19,FTO,ENO2,RRP12                                                                                                                                                                                                                                |
| GO:0006417 | Regulation of translation                        | 10 | 398   | 0.87 | 0.00081 | EEF1A2,NAT10,NPM1,GCN1L1,PTBP1,MCTS1,EEF1B2,NOLC1,FTO,CIRBP                                                                                                                                                                                                                                                                                                                  |
| GO:0016032 | Viral process                                    | 13 | 776   | 0.7  | 0.0014  | SKP1,PSMB7,RPL8,XPO5,DYNC1L1,NPM1,RPS7,RPS17,PTBP1,MSN,MCTS1,CDC42,AP2B1                                                                                                                                                                                                                                                                                                     |
| GO:0044085 | Cellular component biogenesis                    | 24 | 2583  | 0.44 | 0.0014  | STAG2,SF3A2,SKP1,NAT10,UBE2K,NPM1,RRM1,PELP1,FARSA,RPS7,FERMT2,CPSF7,RPS17,CDC73,MCTS1,PSAP,CDC42,NOLC1,MMS19,RRP12,DNM1L,SRP54,CIRBP,AP2B1                                                                                                                                                                                                                                  |
| GO:1901576 | Organic substance biosynthetic process           | 24 | 2734  | 0.42 | 0.0032  | EEF1A2,SPR,RPN2,RPL8,WDR61,PDXK,GCN1L1,RRM1,ATP5H,FARSA,CECR5,RPS7,CPSF7,RPS17,ACAT2,CDC73,MCTS1,POLR1C,MTAP,BTF3,EEF1B2,CKMT1A,MMS19,ENO2                                                                                                                                                                                                                                   |
| GO:0090304 | Nucleic acid metabolic process                   | 21 | 2178  | 0.46 | 0.0036  | SF3A2,NAT10,RPL8,XPO5,WDR61,RAVER1,NPM1,PELP1,FARSA,RPS7,CPSF7,RPS17,PTBP1,TSNAX,CDC73,POLR1C,BTF3,NOLC1,MMS19,FTO,RRP12                                                                                                                                                                                                                                                     |
| GO:0043170 | Macromolecule metabolic process                  | 38 | 6137  | 0.26 | 0.0054  | EEF1A2,SF3A2,PSMA2,SKP1,RPN2,CAPNS1,NAT10,PSMB7,UBE2K,FAF2,RPL8,XPO5,WDR61,SAE1,RAVER1,NPM1,GCN1L1,RRM1,PELP1,CYCS,FARSA,RPS7,CPSF7,RPS17,PTBP1,TSNAX,CDC73,MCTS1,POLR1C,BTF3,EEF1B2,PSAP,CDC42,NOLC1,MMS19,FTO,RRP12,AP2B1                                                                                                                                                  |
| GO:1903311 | Regulation of mrna metabolic process             | 8  | 338   | 0.85 | 0.0104  | PSMA2,PSMB7,NPM1,CPSF7,PTBP1,CDC73,FTO,CIRBP                                                                                                                                                                                                                                                                                                                                 |
| GO:0006396 | RNA processing                                   | 12 | 854   | 0.62 | 0.0130  | SF3A2,NAT10,RAVER1,PELP1,RPS7,CPSF7,RPS17,PTBP1,TSNAX,CDC73,NOLC1,RRP12                                                                                                                                                                                                                                                                                                      |
| GO:0016055 | Wnt signaling pathway                            | 8  | 351   | 0.83 | 0.0130  | PSMA2,SKP1,PSMB7,WDR61,FERMT2,CDC73,CDC42,AP2B1                                                                                                                                                                                                                                                                                                                              |
| GO:0051290 | Protein heterotetramerization                    | 3  | 15    | 1.77 | 0.0130  | RRM1,FARSA,CPSF7                                                                                                                                                                                                                                                                                                                                                             |
| GO:0006412 | Translation                                      | 8  | 366   | 0.81 | 0.0149  | EEF1A2,RPL8,GCN1L1,FARSA,RPS7,RPS17,MCTS1,EEF1B2                                                                                                                                                                                                                                                                                                                             |
| GO:0031329 | Regulation of cellular catabolic process         | 12 | 875   | 0.61 | 0.0149  | EEF1A2,PSMA2,CAPNS1,PSMB7,UBE2K,NPM1,RPS7,MSN,PSAP,FTO,DNM1L,CIRBP                                                                                                                                                                                                                                                                                                           |
| GO:0046907 | Intracellular transport                          | 16 | 1520  | 0.49 | 0.0149  | NUTF2,FAF2,RPL8,XPO5,TNPO3,DYNC1L1,NPM1,ATP5H,RPS7,RPS17,IPO9,PSAP,CDC42,DNM1L,SRP54,AP2B1                                                                                                                                                                                                                                                                                   |
| GO:0009987 | Cellular process                                 | 63 | 15024 | 0.09 | 0.0158  | GLG1,EEF1A2,STAG2,NUTF2,SF3A2,PSMA2,SKP1,SPR,RPN2,CAPNS1,NAT10,PSMB7,UBE2K,FAF2,RPL8,XPO5,TNPO3,ESYT1,WDR61,SAE1,DYNC1L1,CT5,PDXK,RAVER1,NPM1,GCN1L1,RRM1,PELP1,ATP5H,UQCRFS1,CYCS,FARSA,NCAPD2,CECR5,RPS7,FERMT2,CPSF7,RPS17,PTBP1,MSN,IPO9,TSNAX,ACAT2,CDC73,MCTS1,SURF4,POLR1C,MTAP,BTF3,EEF1B2,PSAP,CDC42,NOLC1,CKMT1A,MMS19,FTO,ENO2,RRP12,DNM1L,SRP54,CIRBP,HADH,AP2B1 |

|            |                                                    |    |      |      |        |                                                                                                                                                                                                                          |
|------------|----------------------------------------------------|----|------|------|--------|--------------------------------------------------------------------------------------------------------------------------------------------------------------------------------------------------------------------------|
| GO:0032268 | Regulation of cellular protein metabolic process   | 22 | 2693 | 0.38 | 0.0170 | GLG1,EEF1A2,SKP1,PPP1R7,NAT10,UBE2K,WDR61,SAE1,NPM1,GCN1L1,CYCS,RPS7,PTBP1,MSN,MCTS1,EEF1B2,PSAP,CDC42,NOLC1,FTO,DNM1L,CIRBP                                                                                             |
| GO:0034645 | Cellular macromolecule biosynthetic process        | 16 | 1592 | 0.47 | 0.0226 | EEF1A2,RPN2,RPL8,WDR61,GCN1L1,RRM1,FARSA,RPS7,CPSF7,RPS17,CDC73,MCTS1,POLR1C,BTF3,EEF1B2,MMS19                                                                                                                           |
| GO:0042254 | Ribosome biogenesis                                | 7  | 292  | 0.85 | 0.0226 | NAT10,NPM1,PELP1,RPS7,RPS17,NOLC1,RRP12                                                                                                                                                                                  |
| GO:0051641 | Cellular localization                              | 23 | 2967 | 0.36 | 0.0226 | NUTF2,PSMA2,SKP1,PSMB7,FAF2,RPL8,XPO5,TNPO3,ESYT1,DYNC1LI1,PDXK,NPM1,ATP5H,RPS7,FERMT2,RPS17,IPO9,SURF4,PSAP,CDC42,DNM1L,SRP54,AP2B1                                                                                     |
| GO:0034613 | Cellular protein localization                      | 16 | 1610 | 0.47 | 0.0239 | NUTF2,SKP1,FAF2,RPL8,XPO5,TNPO3,NPM1,RPS7,FERMT2,RPS17,IPO9,PSAP,CDC42,DNM1L,SRP54,AP2B1                                                                                                                                 |
| GO:0051649 | Establishment of localization in cell              | 20 | 2375 | 0.4  | 0.0241 | NUTF2,PSMA2,PSMB7,FAF2,RPL8,XPO5,TNPO3,DYNC1LI1,PDXK,NPM1,ATP5H,RPS7,RPS17,IPO9,SURF4,PSAP,CDC42,DNM1L,SRP54,AP2B1                                                                                                       |
| GO:0006364 | rRNA processing                                    | 6  | 212  | 0.92 | 0.0264 | NAT10,PELP1,RPS7,RPS17,NOLC1,RRP12                                                                                                                                                                                       |
| GO:0019080 | Viral gene expression                              | 5  | 132  | 1.05 | 0.0264 | RPL8,RPS7,RPS17,PTBP1,MCTS1                                                                                                                                                                                              |
| GO:0044249 | Cellular biosynthetic process                      | 21 | 2611 | 0.38 | 0.0264 | EEF1A2,SPR,RPN2,RPL8,WDR61,PDXK,GCN1L1,RRM1,ATP5H,FARSA,CECR5,RPS7,CPSF7,RPS17,CDC73,MCTS1,POLR1C,MTAP,BTF3,EEF1B2,MMS19                                                                                                 |
| GO:0071840 | Cellular component organization or biogenesis      | 34 | 5633 | 0.25 | 0.0264 | STAG2,SF3A2,SKP1,CAPNS1,NAT10,UBE2K,FAF2,ESYT1,WDR61,DYNC1LI1,NPM1,RRM1,PPLP1,ATP5H,CYCS,FARSA,NCAPD2,RPS7,FERMT2,CPSF7,RPS17,MSN,CDC73,MCTS1,SURF4,PSAP,CDC42,NOLC1,MMS19,RRP12,DNM1L,SRP54,CIRBP,AP2B1                 |
| GO:0042274 | Ribosomal small subunit biogenesis                 | 4  | 70   | 1.23 | 0.0293 | NAT10,NPM1,RPS7,RPS17                                                                                                                                                                                                    |
| GO:0072594 | Establishment of protein localization to organelle | 8  | 433  | 0.74 | 0.0293 | NUTF2,RPL8,TNPO3,RPS7,RPS17,IPO9,SRP54,AP2B1                                                                                                                                                                             |
| GO:0006886 | Intracellular protein transport                    | 12 | 999  | 0.55 | 0.0301 | NUTF2,FAF2,RPL8,XPO5,TNPO3,NPM1,RPS7,RPS17,IPO9,PSAP,SRP54,AP2B1                                                                                                                                                         |
| GO:1904666 | Regulation of ubiquitin protein ligase activity    | 3  | 26   | 1.53 | 0.0302 | SKP1,RPS7,DNM1L                                                                                                                                                                                                          |
| GO:1901566 | Organonitrogen compound biosynthetic process       | 14 | 1346 | 0.49 | 0.0334 | EEF1A2,SPR,RPN2,RPL8,PDXK,GCN1L1,ATP5H,FARSA,RPS7,RPS17,MCTS1,MTAP,EEF1B2,CKMT1A                                                                                                                                         |
| GO:0034660 | ncRNA metabolic process                            | 8  | 467  | 0.71 | 0.0419 | NAT10,XPO5,PELP1,FARSA,RPS7,RPS17,NOLC1,RRP12                                                                                                                                                                            |
| GO:0048522 | Positive regulation of cellular process            | 33 | 5579 | 0.24 | 0.0423 | EEF1A2,NUTF2,SF3A2,PSMA2,SKP1,PPP1R7,CAPNS1,NAT10,PSMB7,UBE2K,XPO5,WDR61,SAE1,DYNC1LI1,CCT5,NPM1,GCN1L1,PELP1,CYCS,RPS7,PTBP1,MSN,CDC73,MCTS1,SURF4,PSAP,CDC42,NOLC1,MMS19,FTO,DNM1L,CIRBP,AP2B1                         |
| GO:0033365 | Protein localization to organelle                  | 10 | 743  | 0.6  | 0.0427 | NUTF2,SKP1,RPL8,TNPO3,RPS7,RPS17,IPO9,DNM1L,SRP54,AP2B1                                                                                                                                                                  |
| GO:0048518 | Positive regulation of biological process          | 35 | 6112 | 0.23 | 0.0427 | EEF1A2,NUTF2,SF3A2,PSMA2,SKP1,PPP1R7,CAPNS1,NAT10,PSMB7,UBE2K,XPO5,WDR61,SAE1,DYNC1LI1,CCT5,NPM1,GCN1L1,PELP1,CYCS,RPS7,PTBP1,MSN,CDC73,MCTS1,SURF4,POLR1C,PSAP,CDC42,NOLC1,MMS19,FTO,DNM1L,CIRBP,HADH,AP2B1             |
| GO:0019222 | Regulation of metabolic process                    | 38 | 6948 | 0.21 | 0.0453 | GLG1,EEF1A2,NUTF2,PSMA2,SKP1,PPP1R7,SPR,CAPNS1,NAT10,PSMB7,UBE2K,RPL8,XPO5,WDR61,SAE1,CCT5,NPM1,GCN1L1,PELP1,CYCS,RPS7,CPSF7,RPS17,PTBP1,MSN,TSNAX,CDC73,MCTS1,POLR1C,EEF1B2,PSAP,CDC42,NOLC1,MMS19,FTO,DNM1L,CIRBP,HADH |



## Appendix table S9

Sequences of the primers used in this study for qPCR analyses.

|                                        |                          |
|----------------------------------------|--------------------------|
| <b>CoV-2 N Forward:</b>                | GACCCCAAATCAGCGAAAT      |
| <b>CoV-2 N Reverse:</b>                | TCTGGTACTGCCAGTTGAATCTG  |
| <b>ACTB Forward:</b>                   | GACCCAGATCATGTTTGAGACCTT |
| <b>ACTB Reverse:</b>                   | CCAGAGGCGTACAGGGATAGC    |
| <b>IL-1<math>\beta</math> Forward:</b> | ATGATGGCTTATTACAGTGGCAA  |
| <b>IL-1<math>\beta</math> Reverse:</b> | GTCGGAGATTCGTAGCTGGA     |
| <b>TNFA Forward:</b>                   | CTCTTCTGCCTGCTGCACTTTG   |
| <b>TNFA Reverse:</b>                   | ATGGGCTACAGGCTTGTCCTC    |
| <b>ATP2B1 Forward:</b>                 | CGATCTCACTGGCTTATTCAGTCA |
| <b>ATP2B1 Reverse:</b>                 | TAGCTGTAGCATTTCCCATGGTT  |
| <b>ATP2A1 Forward:</b>                 | AACGAGGCCAAAGGTGTCTA     |
| <b>ATP2A1 Reverse:</b>                 | TCGAGAGGCTTCTCACATC      |
| <b>IL-12 Forward:</b>                  | TGATGGCCCTGTGCCTTAGT     |
| <b>IL-12 Reverse:</b>                  | GGATCCATCAGAAGCTTTGCAT   |
| <b>ACE2 Forward:</b>                   | GAAATTCCCAAAGACCAGTGGA   |
| <b>ACE2 Reverse:</b>                   | CCCCAACTATCTCTCGCTTCAT   |
| <b>Spike Forward:</b>                  | ATTGCCACTAGTCTCTAGT      |
| <b>Spike Reverse:</b>                  | AGGATCTGAAAACCTTTGTCA    |
| <b>TMEM16 Forward:</b>                 | GAAGCGGAAACAGATGCGACTC   |
| <b>TMEM16 Reverse:</b>                 | CTGGCTTCGTATTCAGCTCTAGG  |
